# Supplementary material for: Neuron-Like Networks Between Ribosomal Proteins Within the Ribosome
Source: PubMed Central journal article supplement (PMC4881015; doi:10.1038/srep26485), 2016-05-26
Supplement: srep26485-s1.pdf [file srep26485-s1.pdf]

**Neuron-Like Networks Between  
Ribosomal Proteins Within the Ribosome**

**Olivier Poirot & Yuri Timsit**

**Supplementary Information**



**Table S2**

Properties of the extensions of the eubacterial and archaeal ribosomes (from the pdb structure 4v8i and 1s72, respectively)

| <b>Segment</b>     | Length<br>(aas) | <b>Mix</b>  | Length<br>(aas) | $\alpha$ -helix<br>tot. | $\alpha$ -helix<br>prop. | <b>Loop</b>   | Length<br>(aas) | <b>Helix</b> | Length<br>(aas) | <b><math>\beta</math>-HP</b> | size        |
|--------------------|-----------------|-------------|-----------------|-------------------------|--------------------------|---------------|-----------------|--------------|-----------------|------------------------------|-------------|
| <b>50S eubact.</b> |                 |             |                 |                         |                          |               |                 |              |                 |                              |             |
| <b>uL13</b>        | 11              | <b>uL2</b>  | 52              | 8                       | 0,15                     | <b>uL3</b>    | 53              | <b>bL9</b>   | 37              | <b>bL21</b>                  | 17          |
| <b>uL15</b>        | 78              | <b>bL19</b> | 19              | 9                       | 0,47                     | <b>uL4</b>    | 59              | <b>bL19</b>  | 13              | <b>uL22</b>                  | 16          |
| <b>uL16</b>        | 30              | <b>bL20</b> | 71              | 54                      | 0,76                     | <b>uL13_1</b> | 16              | <b>av.</b>   | <b>25</b>       | <b>uL23</b>                  | 17          |
| <b>bL17</b>        | 13              | <b>bL25</b> | 25              | 8                       | 0,32                     | <b>uL13_2</b> | 15              |              | 37              | <b>bL28</b>                  | 29          |
| <b>bL27</b>        | 26              | <b>bL32</b> | 29              | 11                      | 0,38                     | <b>uL16</b>   | 13              |              |                 | <b>av.</b>                   | <b>19,8</b> |
| <b>bL31_1</b>      | 9               | <b>av.</b>  | <b>39,2</b>     |                         | <b>0,42</b>              | <b>bL17</b>   | 12              |              |                 | <b>max</b>                   | 29          |
| <b>bL31_2</b>      | 13              | <b>max</b>  | 71              |                         |                          | <b>bL35</b>   | 21              |              |                 |                              |             |
| <b>bL34</b>        | 6               |             |                 |                         |                          | <b>av.</b>    | <b>27</b>       |              |                 |                              |             |
| <b>av.</b>         | <b>23,3</b>     |             |                 |                         |                          | <b>max</b>    | 59              |              |                 |                              |             |
| <b>max</b>         | 78              |             |                 |                         |                          |               |                 |              |                 |                              |             |
| <b>30S eubact</b>  |                 |             |                 |                         |                          |               |                 |              |                 |                              |             |
| <b>bS6</b>         | 8               | <b>uS12</b> | 27              | 8                       | 0,30                     | <b>uS8</b>    | 19              | <b>uS5</b>   | 8               | <b>uS5</b>                   | 13          |
| <b>uS7</b>         | 18              | <b>uS13</b> | 50              | 29                      | 0,58                     |               |                 |              |                 | <b>uS7</b>                   | 10          |
| <b>uS9</b>         | 29              | <b>uS14</b> | 59              | 21                      | 0,36                     |               |                 |              |                 | <b>uS10</b>                  | 24          |
| <b>uS11</b>        | 16              | <b>av.</b>  | <b>45,3</b>     |                         | <b>0,41</b>              |               |                 |              |                 | <b>uS17</b>                  | 17          |
| <b>bS18</b>        | 10              | <b>max</b>  | 59              |                         |                          |               |                 |              |                 | <b>av.</b>                   | <b>16</b>   |
| <b>uS19</b>        | 9               |             |                 |                         |                          |               |                 |              |                 | <b>max</b>                   | 24          |
| <b>av.</b>         | <b>15</b>       |             |                 |                         |                          |               |                 |              |                 |                              |             |
| <b>max</b>         | 29              |             |                 |                         |                          |               |                 |              |                 |                              |             |
| <b>50S archae</b>  |                 |             |                 |                         |                          |               |                 |              |                 |                              |             |
| <b>uL3</b>         | 15              | <b>eL19</b> | 39              | 22                      | 0,56                     | <b>uL3</b>    | 56              | <b>uL24</b>  | 22              | <b>eL22</b>                  | 16          |
| <b>uL15</b>        | 60              | <b>eL37</b> | 55              | 4                       | 0,07                     | <b>uL4_1</b>  | 62              | <b>eL43</b>  | 11              |                              |             |
| <b>eL15</b>        | 24              | <b>eL39</b> | 48              | 18                      | 0,38                     | <b>uL4_2</b>  | 12              | <b>av.</b>   | <b>16,5</b>     |                              |             |
| <b>uL18</b>        | 19              | <b>av.</b>  | <b>47,3</b>     |                         | <b>0,34</b>              | <b>uL5_1</b>  | 20              | <b>max</b>   | 22              |                              |             |
| <b>eL21</b>        | 25              | <b>max</b>  | 55              |                         |                          | <b>uL5_2</b>  | 11              |              |                 |                              |             |
| <b>av.</b>         | <b>28,6</b>     |             |                 |                         |                          | <b>uL16</b>   | 22              |              |                 |                              |             |
| <b>max</b>         | 60              |             |                 |                         |                          | <b>uL13_1</b> | 12              |              |                 |                              |             |
|                    |                 |             |                 |                         |                          | <b>uL13_2</b> | 9               |              |                 |                              |             |
|                    |                 |             |                 |                         |                          | <b>uL14</b>   | 12              |              |                 |                              |             |
|                    |                 |             |                 |                         |                          | <b>eL15</b>   | 29              |              |                 |                              |             |
|                    |                 |             |                 |                         |                          | <b>eL32</b>   | 45              |              |                 |                              |             |
|                    |                 |             |                 |                         |                          | <b>eL42</b>   | 43              |              |                 |                              |             |
|                    |                 |             |                 |                         |                          | <b>av.</b>    | <b>27,8</b>     |              |                 |                              |             |
|                    |                 |             |                 |                         |                          | <b>max</b>    | 62              |              |                 |                              |             |

**Table S3**

List of the intermolecular interactions between the ribosomal proteins within the 60S subunit of the eukaryotic ribosome (from the pdb structure 4v88). Colour code: light pink: 3 extensions; light blue: 2 extensions; light green: 1 extension; white: without extension.

| Name        | Ch. |               | 1                    | 2                 | 3                    | 4                      | 5                    | 6                 | 7                 | 8                 |
|-------------|-----|---------------|----------------------|-------------------|----------------------|------------------------|----------------------|-------------------|-------------------|-------------------|
| <b>uL2</b>  | A   | glob. domain  | eL8<br><i>GS</i>     | eL15<br><i>GL</i> | eL43<br><i>GG/GH</i> |                        |                      |                   |                   |                   |
| <b>uL3</b>  | B   | glob. dom.    | uL13<br><i>GG</i>    | uL14<br><i>GG</i> | eL24<br><i>GG</i>    | eS6 (40S)<br><i>GG</i> |                      |                   |                   |                   |
|             |     | seg-N 1-21    |                      | uL14<br><i>SL</i> |                      |                        |                      |                   |                   |                   |
|             |     | loop 220-274  | uL13<br><i>LL</i>    |                   |                      |                        |                      |                   |                   |                   |
|             |     | mix-C 373-387 |                      |                   | eL24<br><i>HG</i>    |                        |                      |                   |                   |                   |
| <b>uL4</b>  | C   | glob. dom.    |                      |                   |                      |                        |                      | eL18<br><i>GG</i> |                   |                   |
|             |     | loop 44-115   | eL13<br><i>LH</i>    | eL15<br><i>LS</i> | eL37<br><i>LH</i>    |                        |                      |                   |                   |                   |
|             |     | loop 183-202  |                      |                   |                      | uL24<br><i>LH</i>      |                      |                   |                   |                   |
|             |     | mix-C 262-362 |                      |                   |                      |                        | uL30<br><i>HH/HG</i> | eL18<br><i>HG</i> | eL20<br><i>HG</i> | eL21<br><i>HS</i> |
| <b>uL5</b>  | J   | glob. dom.    |                      |                   |                      |                        |                      |                   |                   |                   |
|             |     | loop 48-66    |                      | eL42<br><i>LS</i> |                      |                        |                      |                   |                   |                   |
|             |     | loop 131-156  | uL18<br><i>LS/LG</i> |                   |                      |                        |                      |                   |                   |                   |
| <b>uL6</b>  | H   | glob. dom.    | eL14<br><i>GS</i>    | uL13<br><i>GG</i> | eL20<br><i>GS</i>    | eL40<br><i>GH</i>      |                      |                   |                   |                   |
| <b>eL6</b>  | E   | glob. dom.    |                      | eL14<br><i>GH</i> | eL33<br><i>GG/GS</i> |                        |                      |                   |                   |                   |
|             |     | seg-N 2-30    | eL32<br><i>SG</i>    |                   |                      |                        |                      |                   |                   |                   |
|             |     | seg-C 160-176 |                      |                   | eL33<br><i>SS/SG</i> |                        |                      |                   |                   |                   |
| <b>eL8</b>  | G   | glob. dom.    |                      | eL15<br><i>GG</i> |                      |                        | eL36<br><i>GG</i>    |                   |                   |                   |
|             |     | mix-N 24-73   | uL2<br><i>SG</i>     | eL15<br><i>HG</i> | uL23<br><i>SS</i>    | eL27<br><i>SL</i>      |                      |                   |                   |                   |
|             |     | mix-C 231-256 | -                    |                   |                      |                        |                      |                   |                   |                   |
| <b>uL13</b> | O   | glob. dom.    | uL3<br><i>GG</i>     | uL6<br><i>GG</i>  |                      | eL20<br><i>GS</i>      | eL33<br><i>GG</i>    |                   |                   |                   |
|             |     | loop 58-76    | uL3<br><i>LL</i>     |                   |                      |                        |                      |                   |                   |                   |
|             |     | helix 145-199 |                      |                   | eL14<br><i>HH</i>    |                        |                      |                   |                   |                   |
| <b>eL13</b> | L   | glob. dom.    |                      |                   |                      |                        | uL29<br><i>GS</i>    | eL36<br><i>GS</i> |                   |                   |
|             |     | mix-N 2-49    | uL4<br><i>HL</i>     | eL15<br><i>SS</i> | eL18<br><i>SG</i>    | uL15<br><i>SH</i>      |                      |                   |                   |                   |
|             |     | mix-C 123-194 |                      |                   |                      | uL15<br><i>SG</i>      |                      | eL36<br><i>HS</i> |                   |                   |
| <b>uL14</b> | V   | glob. dom.    | uL3<br><i>GG</i>     | eL24<br><i>GG</i> |                      |                        |                      |                   |                   |                   |
|             |     | loop 39-51    | uL3<br><i>LS</i>     |                   |                      |                        |                      |                   |                   |                   |
| <b>eL14</b> | M   | glob. dom.    |                      |                   |                      | eL20<br><i>GG/GS</i>   |                      |                   |                   |                   |
|             |     | seg-N 3-13    |                      | uL6<br><i>SG</i>  |                      | eL20<br><i>SS</i>      |                      |                   |                   |                   |
|             |     | helix 89-138  | eL6<br><i>HG</i>     |                   | uL13<br><i>HH</i>    |                        |                      |                   |                   |                   |
| <b>uL15</b> | a   | glob. dom.    | eL13<br><i>GS</i>    | eL18<br><i>GG</i> |                      | eL36<br><i>GS</i>      |                      |                   |                   |                   |
|             |     | mix-N 2-72    | eL13<br><i>HS</i>    | eL18<br><i>SG</i> | eL32<br><i>SL</i>    |                        | eL42<br><i>SH</i>    |                   |                   |                   |
| <b>eL15</b> | N   | glob. dom.    |                      |                   | eL8<br><i>GG</i>     |                        | uL29<br><i>GS</i>    | eL36<br><i>GH</i> |                   |                   |
|             |     | loop 67-98    | uL2<br><i>LG</i>     |                   |                      |                        |                      |                   | eL42<br><i>LL</i> |                   |
|             |     | seg-C 172-204 |                      | uL4<br><i>SL</i>  |                      | eL13<br><i>SS</i>      |                      |                   |                   |                   |

|             |   |                            |                   |                   |                        |                      |                   |                   |  |
|-------------|---|----------------------------|-------------------|-------------------|------------------------|----------------------|-------------------|-------------------|--|
| <b>uL16</b> | I | glob. dom.                 |                   | eL20<br><i>GG</i> | eL21<br><i>GS</i>      |                      |                   |                   |  |
|             |   | loop 99-121                | -                 |                   |                        |                      |                   |                   |  |
|             |   | mix-C 199-221              | uL18<br><i>HH</i> |                   |                        |                      |                   |                   |  |
| <b>uL18</b> | D | glob. dom.                 | uL5<br><i>GL</i>  | eL21<br><i>GG</i> |                        |                      |                   |                   |  |
|             |   | mix-N 1-30                 | uL5<br><i>SL</i>  | eL21<br><i>SS</i> |                        |                      |                   |                   |  |
|             |   | mix-C 254-297              |                   |                   | uL16<br><i>HH</i>      |                      |                   |                   |  |
| <b>eL18</b> | Q | glob. dom. 1               | uL4<br><i>GH</i>  |                   |                        | uL15<br><i>GG</i>    |                   |                   |  |
|             |   | seg-N 2-20                 |                   | uL30<br><i>SG</i> |                        |                      |                   |                   |  |
|             |   | mix 144-154                |                   |                   |                        |                      |                   |                   |  |
|             |   | glob. dom. 2               |                   |                   | eL13<br><i>GS</i>      | uL15<br><i>GS</i>    |                   |                   |  |
| <b>eL19</b> | R | glob. dom.                 | -                 |                   |                        |                      |                   |                   |  |
|             |   | mix 53-189                 | eS7<br>(40S)      |                   |                        |                      |                   |                   |  |
| <b>eL20</b> | S | glob. dom.                 | uL4<br><i>GH</i>  | uL30<br><i>GG</i> |                        | eL14<br><i>GG</i>    |                   | eL21<br><i>GS</i> |  |
|             |   | loop 11-25                 |                   |                   |                        |                      |                   | eL21<br><i>LS</i> |  |
|             |   | seg-C 144-172              |                   |                   | uL6<br><i>SG</i>       | eL14<br><i>SG/SS</i> | uL13<br><i>SG</i> |                   |  |
| <b>eL21</b> | T | glob. dom.                 |                   | uL18<br><i>GG</i> |                        |                      |                   | eL29<br><i>GS</i> |  |
|             |   | seg-N 2-27                 |                   | uL18<br><i>SS</i> |                        |                      |                   |                   |  |
|             |   | mix-C 100-160              | uL4<br><i>SH</i>  |                   | uL30<br><i>SS</i>      | uL16<br><i>SG</i>    | eL20<br><i>SG</i> |                   |  |
| <b>uL22</b> | P | glob. dom.                 | -                 |                   |                        |                      |                   |                   |  |
|             |   | $\beta$ -hairpin 122-143   | -                 |                   |                        |                      |                   |                   |  |
|             |   | mix-C 152-184              | eL33<br><i>SL</i> |                   |                        |                      |                   |                   |  |
| <b>eL22</b> | U | glob. dom.                 | -                 |                   |                        |                      |                   |                   |  |
| <b>uL23</b> | X | glob. dom.                 |                   | uL29<br><i>GG</i> |                        |                      |                   |                   |  |
|             |   | seg-N 22-59                | eL8<br><i>SS</i>  | uL29<br><i>SS</i> |                        |                      |                   |                   |  |
|             |   | loop 114-120               |                   |                   | eL39<br><i>LH</i>      |                      |                   |                   |  |
| <b>uL24</b> | Y | glob. dom.                 |                   | eL39<br><i>GL</i> |                        |                      |                   |                   |  |
|             |   | mix-N 2-24                 | uL4<br><i>HL</i>  |                   |                        |                      |                   |                   |  |
| <b>eL24</b> | W | glob. dom.                 | uL3<br><i>GS</i>  | uL14<br><i>GG</i> |                        |                      |                   |                   |  |
|             |   | mix-C 59-98                |                   |                   | eS6 (40S)<br><i>HG</i> |                      |                   |                   |  |
| <b>eL27</b> | Z | glob. dom.                 |                   | eL30<br><i>GG</i> | eL34<br><i>GH</i>      |                      |                   |                   |  |
|             |   | loop 51-67                 | eL8<br><i>LS</i>  |                   |                        |                      |                   |                   |  |
| <b>uL29</b> | h | glob. dom.                 |                   |                   | uL23<br><i>GG</i>      |                      |                   |                   |  |
|             |   | mix-C 70-120               | eL13<br><i>SG</i> | eL15<br><i>SG</i> | uL23<br><i>SS</i>      | eL37<br><i>SH</i>    |                   |                   |  |
| <b>eL29</b> | b | mix-N 2-59                 | eL21<br><i>SG</i> |                   |                        |                      |                   |                   |  |
| <b>uL30</b> | F | glob. dom.                 | uL4<br><i>GH</i>  | eL18<br><i>GS</i> | eL20<br><i>GG</i>      |                      |                   |                   |  |
|             |   | mix-N 23-83<br>(helix maj) | uL4<br><i>HH</i>  |                   |                        | eL21<br><i>SS</i>    |                   |                   |  |
| <b>eL30</b> | c | glob. dom.                 | eL27<br><i>GG</i> | eL34<br><i>GH</i> | eL43<br><i>GG</i>      |                      |                   |                   |  |
| <b>eL31</b> | d | glob. dom.                 | -                 |                   |                        |                      |                   |                   |  |
| <b>eL32</b> | e | glob. dom.                 | eL6<br><i>GS</i>  |                   |                        |                      |                   |                   |  |
|             |   | loop 3-72                  |                   | uL15<br><i>LS</i> | eL33<br><i>LL</i>      |                      |                   |                   |  |

|             |   |              |                   |                      |                   |                   |  |  |  |
|-------------|---|--------------|-------------------|----------------------|-------------------|-------------------|--|--|--|
| <b>eL33</b> | f | glob. dom.   | eL6<br><b>GG</b>  | uL13<br><b>GG</b>    |                   |                   |  |  |  |
|             |   | seg-N 2-8    | eL6<br><b>SG</b>  |                      |                   |                   |  |  |  |
|             |   | loop 16-28   |                   |                      |                   | eL32<br><b>LL</b> |  |  |  |
|             |   | loop 54-64   |                   |                      | uL22<br><b>LS</b> |                   |  |  |  |
| <b>eL34</b> | g | glob. dom.   | -                 |                      |                   |                   |  |  |  |
|             |   | seg-N 2-39   |                   |                      | eL39<br><b>SS</b> |                   |  |  |  |
|             |   | helix 80-113 | eL27<br><b>HG</b> | eL30<br><b>HG</b>    |                   |                   |  |  |  |
| <b>eL36</b> | i | glob. dom.   | eL8<br><b>GG</b>  |                      |                   |                   |  |  |  |
|             |   | mix-N 2-49   |                   | eL13<br><b>SG/SH</b> | eL15<br><b>HG</b> | uL15<br><b>SG</b> |  |  |  |
| <b>eL37</b> | j | mix-N 2-88   | uL4<br><b>HL</b>  | uL29<br><b>HS</b>    | eL39<br><b>SS</b> |                   |  |  |  |
| <b>eL38</b> | k | glob. dom.   | -                 |                      |                   |                   |  |  |  |
| <b>eL39</b> | l | mix-N 2-51   | uL23<br><b>HL</b> | uL24<br><b>LG</b>    | eL34<br><b>SS</b> | eL37<br><b>SS</b> |  |  |  |
| <b>eL40</b> | m | glob. dom.   | -                 |                      |                   |                   |  |  |  |
|             |   | helix 77-92  | uL6<br><b>HG</b>  |                      |                   |                   |  |  |  |
| <b>eL41</b> | N | glob. dom.   | -                 |                      |                   |                   |  |  |  |
| <b>eL42</b> | o | glob. dom.   | -                 |                      |                   |                   |  |  |  |
|             |   | loop 27-69   |                   | eL15<br><b>LL</b>    | uL15<br><b>HS</b> |                   |  |  |  |
|             |   | seg-C 95-106 | uL5<br><b>SL</b>  |                      |                   |                   |  |  |  |
| <b>eL43</b> | p | glob. dom.   | uL2<br><b>GG</b>  | eL30<br><b>GG</b>    |                   |                   |  |  |  |
|             |   | helix 2-34   | uL2<br><b>HG</b>  |                      |                   |                   |  |  |  |
|             |   | helix 74-92  | uL2<br><b>HG</b>  |                      |                   |                   |  |  |  |

**Table S4**

List of the intermolecular interactions between the ribosomal proteins within the 40S subunit of the eukaryotic ribosome (from the pdb structure 4v88). Colour code as in Table S3.

| Name | Ch. |                  | 1                   | 2                    | 3                    | 4                    | 5                 | 6                 | 7                 | 8                 |
|------|-----|------------------|---------------------|----------------------|----------------------|----------------------|-------------------|-------------------|-------------------|-------------------|
| eS1  | B   | glob. dom.       | uS11<br><i>GG</i>   | eS26<br><i>GL</i>    |                      |                      |                   |                   |                   |                   |
| uS2  | A   | glob. dom.       | uS5<br><i>GG/GH</i> | eS17<br><i>GS/GH</i> | eS21<br><i>GG/GL</i> |                      |                   |                   |                   |                   |
| uS3  | D   | glob. dom.       | uS5<br><i>GG</i>    | eS10<br><i>GG/GS</i> |                      | uS10<br><i>GG</i>    | uS14<br><i>GH</i> |                   | Stm1<br><i>GH</i> |                   |
|      |     | seg-C 195-225    |                     |                      | eS17<br><i>SG</i>    |                      |                   | GBP<br><i>SG</i>  |                   |                   |
| uS4  | J   | glob. dom.       | uS5<br><i>GG</i>    |                      | uS8<br><i>GG</i>     | eS24<br><i>GG</i>    | eS30<br><i>GH</i> |                   |                   |                   |
|      |     | seg-N 2-20       |                     | eS4<br><i>SG</i>     |                      |                      |                   |                   |                   |                   |
|      |     | mix-C 166-186    | -                   |                      |                      |                      |                   |                   |                   |                   |
| eS4  | E   | glob. dom.       | eS6<br><i>GH</i>    | uS4<br><i>GS</i>     |                      | eS24<br><i>GG</i>    |                   |                   |                   |                   |
|      |     | seg-N 2-37       | -                   |                      |                      |                      |                   |                   |                   |                   |
|      |     | loop 197-211     |                     |                      | uS17<br><i>LG</i>    |                      |                   |                   |                   |                   |
|      |     | mix-C 242-261    |                     | uS4<br><i>HG</i>     |                      |                      |                   |                   |                   |                   |
| uS5  | C   | glob. dom.       | uS2<br><i>GG</i>    | uS3<br><i>GG</i>     | uS4<br><i>GG</i>     | eS21<br><i>GG/GS</i> | uS8<br><i>GG</i>  | Stm1<br><i>GS</i> |                   |                   |
|      |     | β-hairpin 80-105 | -                   |                      |                      |                      |                   |                   |                   |                   |
|      |     | mix-C 225-250    | uS2<br><i>HG</i>    |                      |                      | eS21<br><i>SS</i>    |                   |                   |                   |                   |
| eS6  | G   | glob. dom.       |                     | eS24<br><i>GH</i>    | eL24<br>(60S)        | uL3<br>(60S)         |                   |                   |                   |                   |
|      |     | mix-C 118-226    | eS4<br><i>HG</i>    |                      |                      |                      |                   |                   |                   |                   |
| uS7  | F   | glob. dom.       |                     | eS25<br><i>GG</i>    | eS28<br><i>GG</i>    |                      |                   |                   |                   |                   |
|      |     | mix-N 20-81      | uS9<br><i>HG/SG</i> |                      |                      |                      |                   |                   |                   |                   |
| eS7  | H   | glob. dom.       | uS15<br><i>GS</i>   | uS8<br><i>GG</i>     |                      |                      |                   |                   |                   |                   |
|      |     | loop 94-113      | -                   |                      |                      |                      |                   |                   |                   |                   |
| uS8  | W   | glob. dom.       | uS5<br><i>GG</i>    | eS7<br><i>GG</i>     | uS4<br><i>GG</i>     | uS17<br><i>GB</i>    | uS15<br><i>GS</i> | eS21<br><i>GG</i> | uS12<br><i>GS</i> | eS27<br><i>GS</i> |
| eS8  | I   | glob. dom.       | uS17<br><i>GL</i>   |                      |                      |                      |                   |                   |                   |                   |
|      |     | loop 3-30        | uS17<br><i>LG</i>   |                      |                      |                      |                   |                   |                   |                   |
| uS9  | Q   | glob. dom.       | uS7<br><i>GH/GS</i> | eS19<br><i>GG</i>    |                      |                      | GBP<br><i>GG</i>  |                   |                   |                   |
|      |     | seg-C 113-143    |                     |                      | uS10<br><i>SB</i>    |                      |                   |                   |                   |                   |
| uS10 | U   | glob. dom.       | uS3<br><i>GG</i>    |                      |                      |                      |                   |                   |                   |                   |
|      |     | β-hairpin 63-84  |                     | uS9<br><i>BS</i>     | uS14<br><i>BH</i>    |                      |                   |                   |                   |                   |
| eS10 | K   | glob. dom.       | uS3<br><i>GG</i>    | eS12<br><i>GG</i>    | S29<br><i>GS</i>     | STM1<br><i>GH</i>    |                   |                   |                   |                   |
|      |     | seg-C 80-96      | uS3<br><i>SG</i>    |                      |                      |                      |                   |                   |                   |                   |
| uS11 | O   | glob. dom.       | eS1<br><i>GG</i>    | eS26<br><i>GL</i>    |                      |                      |                   |                   |                   |                   |
|      |     | seg-C 117-137    |                     | eS26<br><i>SG</i>    |                      |                      |                   |                   |                   |                   |
| uS12 | X   | glob. dom.       |                     |                      | eS30<br><i>GS</i>    | STM1<br><i>GS</i>    |                   |                   |                   |                   |
|      |     | mix 2-40         | uS17<br><i>HB</i>   | uS8<br><i>SG</i>     |                      |                      |                   |                   |                   |                   |
| eS12 | M   | glob. dom.       | eS10<br><i>GG</i>   | eS31<br><i>GS</i>    |                      |                      |                   |                   |                   |                   |
|      |     | loop 101-121     | -                   |                      |                      |                      |                   |                   |                   |                   |

|             |   |                  |                      |                     |                   |                   |                   |  |  |  |
|-------------|---|------------------|----------------------|---------------------|-------------------|-------------------|-------------------|--|--|--|
| <b>uS13</b> | S | glob. dom.       |                      | eS19<br><i>GG</i>   |                   |                   |                   |  |  |  |
|             |   | seg-N 2-31       |                      |                     | eS25<br><i>SG</i> | STM1<br><i>SS</i> |                   |  |  |  |
|             |   | mix-C 76-146     | uS19<br><i>HG/SS</i> |                     |                   |                   |                   |  |  |  |
| <b>uS14</b> | d | mix 4-56         | uS3<br><i>HG</i>     | eS10<br><i>SG</i>   | uS10<br><i>HB</i> |                   |                   |  |  |  |
| <b>uS15</b> | N | glob. dom.       |                      | uS17<br><i>GH</i>   |                   | eS27<br><i>GG</i> |                   |  |  |  |
|             |   | seg-N 2-28       | eS7<br><i>SG</i>     |                     | uS8<br><i>SG</i>  | eS27<br><i>SS</i> |                   |  |  |  |
| <b>uS17</b> | L | glob. dom.       | eS4<br><i>GL</i>     | eS8<br><i>GL</i>    |                   |                   |                   |  |  |  |
|             |   | loop 2-45        |                      | eS8<br><i>LG</i>    |                   |                   |                   |  |  |  |
|             |   | β-hairpin 83-110 |                      |                     |                   | uS8<br><i>BG</i>  | uS12<br><i>BH</i> |  |  |  |
|             |   | mix-C 142-156    |                      |                     | uS15<br><i>HG</i> |                   |                   |  |  |  |
| <b>eS17</b> | R | glob. dom.       |                      | uS3<br><i>GS</i>    | GBP<br><i>GG</i>  |                   |                   |  |  |  |
|             |   | mix-C 71-126     | uS2<br><i>SG/HG</i>  |                     |                   |                   |                   |  |  |  |
| <b>uS19</b> | P | glob. dom.       | uS13<br><i>GH</i>    |                     |                   |                   |                   |  |  |  |
|             |   | seg-N 8-21       | uS13<br><i>SS</i>    |                     |                   |                   |                   |  |  |  |
|             |   | seg-C 120-131    |                      | STM1<br><i>SS</i>   |                   |                   |                   |  |  |  |
| <b>eS19</b> | T | glob. dom.       | uS9<br><i>GG</i>     | uS13<br><i>GG</i>   |                   |                   |                   |  |  |  |
|             |   | β-hairpin 83-93  | -                    |                     |                   |                   |                   |  |  |  |
| <b>eS21</b> | V | glob. dom.       | uS2<br><i>GG</i>     | uS5<br><i>GG</i>    | uS8<br><i>GG</i>  |                   |                   |  |  |  |
|             |   | seg-N 1-18       |                      | uS5<br><i>SG/SS</i> |                   |                   |                   |  |  |  |
|             |   | loop 37-50       | uS2<br><i>LG</i>     |                     |                   |                   |                   |  |  |  |
|             |   | seg-C 75-87      |                      |                     |                   | eS27<br><i>SS</i> |                   |  |  |  |
| <b>eS24</b> | Y | glob. dom.       | eS4<br><i>GG</i>     |                     | uS4<br><i>GG</i>  |                   |                   |  |  |  |
|             |   | mix-C 95-135     |                      | eS6<br><i>HG</i>    |                   |                   |                   |  |  |  |
| <b>eS25</b> | Z | glob. dom.       | uS7<br><i>GG</i>     | uS9                 | uS13<br><i>GS</i> |                   |                   |  |  |  |
| <b>eS26</b> | a | glob. dom.       |                      | uS11<br><i>GS</i>   |                   |                   |                   |  |  |  |
|             |   | loop 42-67       | eS1<br><i>LG</i>     | uS11<br><i>LG</i>   |                   |                   |                   |  |  |  |
| <b>eS27</b> | b | glob. dom.       | uS15<br><i>GG</i>    |                     |                   |                   |                   |  |  |  |
|             |   | mix-N 2-32       | uS15<br><i>SS</i>    | eS21<br><i>SS</i>   | uS8<br><i>SG</i>  |                   |                   |  |  |  |
| <b>eS28</b> | c | glob. dom.       | uS7<br><i>GG</i>     |                     |                   |                   |                   |  |  |  |
| <b>eS30</b> | e | mix 2-61         | uS4<br><i>HG</i>     | uS12<br><i>SG</i>   | STM1<br><i>SH</i> |                   |                   |  |  |  |
| <b>eS31</b> | f | glob. dom.       | -                    |                     |                   |                   |                   |  |  |  |
|             |   | seg-C 83-107     | eS12<br><i>SG</i>    |                     |                   |                   |                   |  |  |  |



**Table S5**

List of the intermolecular interactions between the ribosomal proteins within the 50S subunit of the archaeal ribosome (from the pdb structure 1s72). Colour code as in Table S3.

| Name        | Ch. |                          | 1                    | 2                 | 3                 |
|-------------|-----|--------------------------|----------------------|-------------------|-------------------|
| <b>uL2</b>  | A   | glob. dom.               | eL43<br><i>GH</i>    |                   |                   |
| <b>uL3</b>  | B   | glob. dom.               | uL13<br><i>GG</i>    | uL14<br><i>GG</i> | eL24<br><i>GG</i> |
|             |     | seg-N 1-16               |                      | uL14<br><i>SL</i> |                   |
|             |     | loop 205-261             | uL13<br><i>LL</i>    |                   |                   |
| <b>uL4</b>  | C   | glob. dom.               | eL18<br><i>GG</i>    |                   |                   |
|             |     | loop 42-104              |                      |                   | eL37<br><i>LS</i> |
|             |     | loop 174-186             |                      | uL24<br><i>LH</i> |                   |
| <b>uL5</b>  | D   | glob. dom.               |                      |                   |                   |
|             |     | loop 51-71               | -                    |                   |                   |
|             |     | loop 135-146             | uL18<br><i>LS/LG</i> |                   |                   |
| <b>uL6</b>  | E   | glob. dom.               | uL13<br><i>GL</i>    |                   |                   |
| <b>eL8</b>  | F   | glob. dom.               | eL15<br><i>GG</i>    |                   |                   |
| <b>uL10</b> | G   | glob. dom.               | -                    |                   |                   |
| <b>uL11</b> | I   | glob. dom.               | -                    |                   |                   |
| <b>uL13</b> | J   | glob. dom.               | uL3<br><i>GG</i>     |                   |                   |
|             |     | loop 63-75               | uL3<br><i>LL</i>     |                   |                   |
|             |     | loop 120-129             |                      | uL6<br><i>LG</i>  |                   |
| <b>uL14</b> | K   | glob. dom.               | uL3<br><i>GG</i>     | eL24<br><i>GG</i> |                   |
|             |     | loop 34-46               | uL3<br><i>LS</i>     |                   |                   |
| <b>uL15</b> | L   | glob. dom.               | eL18<br><i>GG</i>    |                   |                   |
|             |     | seg-N 1-61               |                      | eL32<br><i>SL</i> | eL42<br><i>SL</i> |
| <b>eL15</b> | M   | glob. dom.               | eL8<br><i>GG</i>     |                   |                   |
|             |     | loop 68-97               |                      | eL42<br><i>LL</i> |                   |
|             |     | seg-C 170-194            | -                    |                   |                   |
| <b>uL16</b> | H   | glob. dom.               | -                    |                   |                   |
|             |     | loop 97-119              | -                    |                   |                   |
| <b>uL18</b> | N   | glob. dom.               |                      | eL21<br><i>GG</i> |                   |
|             |     | seg-N 1-20               | uL5<br><i>SL</i>     | eL21<br><i>SS</i> |                   |
| <b>eL18</b> | O   | glob. dom.               | uL4<br><i>GG</i>     | uL15<br><i>GG</i> |                   |
| <b>eL19</b> | P   | glob. dom.               | -                    |                   |                   |
|             |     | mix-C 51-90              | > 30-S ?             |                   |                   |
| <b>eL21</b> | Q   | glob. dom.               | uL18<br><i>GG</i>    |                   |                   |
|             |     | seg-N 1-26               | uL18<br><i>SS</i>    |                   |                   |
| <b>uL22</b> | R   | glob. dom.               | -                    |                   |                   |
|             |     | $\beta$ -hairpin 122-138 | -                    |                   |                   |
| <b>uL23</b> | S   | glob. dom.               | uL29<br><i>GG</i>    | eL39<br><i>GH</i> |                   |
| <b>uL24</b> | T   | glob. dom.               | -                    |                   |                   |
|             |     | helix 1-23               | uL4<br><i>HL</i>     |                   |                   |

|             |   |              |                   |                   |  |
|-------------|---|--------------|-------------------|-------------------|--|
| <b>eL24</b> | U | glob. dom.   | uL3<br><b>GG</b>  | uL14<br><b>GG</b> |  |
| <b>uL29</b> | V | glob. dom.   | uL23<br><b>GG</b> |                   |  |
| <b>uL30</b> | W | glob. dom.   | -                 |                   |  |
| <b>eL31</b> | X | glob. dom.   | -                 |                   |  |
| <b>eL32</b> | Y | glob. dom.   | -                 |                   |  |
|             |   | loop 124-169 | uL15<br><b>LS</b> |                   |  |
| <b>eL37</b> | 1 | mix 1-56     | uL4<br><b>SL</b>  | eL39<br><b>SS</b> |  |
| <b>eL39</b> | 2 | Mix 1_49     | uL23<br><b>HG</b> | eL37<br><b>SS</b> |  |
| <b>eL42</b> | 3 | glob. dom.   | -                 |                   |  |
|             |   | loop 24-67   | uL15<br><b>LS</b> | eL15<br><b>LL</b> |  |
| <b>eL43</b> | Z | glob. dom.   | -                 |                   |  |
|             |   | helix 71-82  | uL2<br><b>HG</b>  |                   |  |

**Table S6**

List of the intermolecular interactions between the ribosomal proteins within the 50S subunit of the eubacterial ribosome (from the pdb structure 4v8i). Colour code as in Table S3.

| Name        | Ch. |                 | 1                    | 2                       | 3                 | 4                 |
|-------------|-----|-----------------|----------------------|-------------------------|-------------------|-------------------|
| <b>uL2</b>  | D   | glob. dom.      | uL2<br><i>GS</i>     | bS6 (30S)<br><i>GG</i>  |                   |                   |
|             |     | mix-C 220-272   | uL2<br><i>SG</i>     |                         |                   |                   |
| <b>uL3</b>  | E   | glob. dom.      |                      | uL14<br><i>GG</i>       |                   | bL19<br><i>GH</i> |
|             |     | loop 109-162    | uL13<br><i>LL</i>    |                         | bL17<br><i>LS</i> |                   |
| <b>uL4</b>  | F   | glob. dom.      | uL15<br><i>GS</i>    |                         |                   |                   |
|             |     | loop 44-103     |                      | bL20<br><i>LS</i>       |                   |                   |
| <b>uL5</b>  | G   | glob. dom.      | bL31<br><i>GG/GS</i> | uS13 (30S)<br><i>GG</i> |                   |                   |
| <b>uL6</b>  | H   | glob. dom.      | -                    |                         |                   |                   |
| <b>bL9</b>  | I   | glob. dom.      | bL28<br><i>GG</i>    |                         |                   |                   |
|             |     | helix 41-78     |                      |                         |                   |                   |
| <b>uL13</b> | N   | glob. dom.      | -                    |                         |                   |                   |
|             |     | seg-N 1-12      |                      |                         | bL21<br><i>SG</i> |                   |
|             |     | loop 35-51      |                      | bL20<br><i>LH</i>       |                   |                   |
| <b>uL14</b> | O   | glob. dom.      | uL3<br><i>GG</i>     | bL19<br><i>GG</i>       |                   |                   |
|             |     | seg-N 1-79      | uL4<br><i>SG</i>     | bL21<br><i>SB</i>       | bL35<br><i>SG</i> |                   |
| <b>uL15</b> | P   | glob. dom.      | -                    |                         |                   |                   |
|             |     | seg-N 1-31      | bL25<br><i>SG</i>    |                         |                   |                   |
|             |     | loop 76-89      |                      | bL27<br><i>LS</i>       |                   |                   |
| <b>uL16</b> | Q   | glob. dom.      | bL25<br><i>GG</i>    |                         |                   |                   |
|             |     | seg-N 1-14      | uL3<br><i>SL</i>     |                         |                   |                   |
|             |     | loop 99-111     |                      | uL22<br><i>LG</i>       | bL32<br><i>LG</i> |                   |
| <b>uL17</b> | R   | glob. dom.      | -                    |                         |                   |                   |
| <b>uL18</b> | S   | glob. dom.      | bL27 ?<br><i>GG</i>  |                         |                   |                   |
|             |     | seg-N 1-14      | uL3<br><i>GG</i>     | uL14<br><i>GG</i>       |                   |                   |
| <b>bL19</b> | T   | glob. dom.      | uL3<br><i>GG</i>     | uL14<br><i>GG</i>       |                   |                   |
|             |     | helix 1-14      | uL3<br><i>HG</i>     |                         |                   |                   |
| <b>bL20</b> | U   | glob. dom.      |                      |                         | bL21<br><i>GG</i> |                   |
|             |     | mix-C 116-135   | -                    |                         |                   |                   |
| <b>bL21</b> | V   | glob. dom.      | uL13<br><i>GS</i>    |                         | bL20<br><i>GG</i> |                   |
|             |     | mix-N 1-72      | uL4<br><i>SL</i>     | uL13<br><i>HL</i>       | bL21<br><i>HB</i> | bL32<br><i>SH</i> |
| <b>bL22</b> | W   | glob. dom.      | bL17<br><i>GL</i>    | bL32<br><i>GS</i>       |                   |                   |
|             |     | β-hairpin 70-87 |                      | uL15<br><i>BS</i>       | bL20<br><i>BH</i> |                   |
| <b>uL22</b> | X   | glob. dom.      | bL17<br><i>GL</i>    | bL32<br><i>GS</i>       |                   |                   |
|             |     | β-hairpin 82-98 | -                    |                         |                   |                   |
| <b>uL23</b> | Y   | glob. dom.      | uL29<br><i>GG</i>    |                         |                   |                   |
|             |     | β-hairpin 59-76 |                      | bL34 ?<br><i>BS</i>     |                   |                   |
| <b>uL24</b> | Y   | glob. dom.      | -                    |                         |                   |                   |

|             |   |                        |                   |                         |                   |  |
|-------------|---|------------------------|-------------------|-------------------------|-------------------|--|
| <b>bL25</b> | Z | glob. dom.             | uL16<br><i>GG</i> |                         |                   |  |
|             |   | mix-C 177-202          | uL16<br><i>SG</i> |                         |                   |  |
| <b>bL27</b> | 0 | glob. dom.             |                   | uL18<br><i>GG</i>       |                   |  |
|             |   | seg-N 2-28             | uL16<br><i>SL</i> |                         |                   |  |
| <b>bL28</b> | 1 | glob. dom.             | bL9<br><i>GG</i>  |                         |                   |  |
|             |   | $\beta$ -hairpin 13-42 | -                 |                         |                   |  |
| <b>uL29</b> | 2 | glob. dom.             | uL23<br><i>GG</i> |                         |                   |  |
| <b>uL30</b> | 3 | glob. dom.             | -                 |                         |                   |  |
| <b>bL31</b> | 4 | glob. dom.             | uL5<br><i>GG</i>  | uS13 (30S)<br><i>GG</i> |                   |  |
|             |   | seg-N 1-10             | uL5<br><i>SG</i>  |                         |                   |  |
|             |   | seg-C 33-46            | uL5<br><i>SG</i>  |                         |                   |  |
| <b>bL32</b> | 5 | glob. dom.             | bL17<br><i>GL</i> |                         |                   |  |
|             |   | mix-N 2-31             |                   | bL20<br><i>HS</i>       | uL22<br><i>SG</i> |  |
| <b>bL33</b> | 6 | glob. dom.             | bL35<br><i>GL</i> |                         |                   |  |
| <b>bL34</b> | 7 | glob. dom.             | -                 |                         |                   |  |
|             |   | seg-N 1-7              | uL23<br><i>SB</i> |                         |                   |  |
| <b>bL35</b> | 8 | glob. dom.             | uL15<br><i>GS</i> |                         |                   |  |
|             |   | loop 25-46             |                   | bL33<br><i>LG</i>       |                   |  |
| <b>bL36</b> | 9 | glob. dom.             | -                 |                         |                   |  |

**Table S7**

List of the intermolecular interactions between the ribosomal proteins within the 30S subunit of the eubacterial ribosome (from the pdb structure 4v8i). Colour code as in Table S3.

| Name | Ch. |                 | 1                    | 2                     | 3                      | 4 |
|------|-----|-----------------|----------------------|-----------------------|------------------------|---|
| uS2  | B   | glob. dom.      | uS8<br><i>GL</i>     |                       |                        |   |
| uS3  | C   | glob. dom.      | uS5<br><i>GG</i>     | uS10<br><i>GG/GB</i>  | uS14<br><i>GH</i>      |   |
| uS4  | D   | glob. dom.      | uS5<br><i>GG</i>     |                       |                        |   |
| uS5  | E   | glob. dom.      | uS3<br><i>GG</i>     | uS4<br><i>GG</i>      |                        |   |
|      |     | β-hairpin 15-28 | -                    |                       |                        |   |
|      |     | helix 144-152   |                      |                       | uS8<br><i>HG</i>       |   |
| bS6  | F   | glob. dom.      | uS15<br><i>GG</i>    | bS18<br><i>GG</i>     | uL2 (50S)<br><i>GG</i> |   |
|      |     | seg 92-100      |                      | bS18<br><i>SG</i>     |                        |   |
| uS7  | G   | glob. dom.      | uS9<br><i>GG</i>     | uS11<br><i>GG</i>     |                        |   |
|      |     | seg-N 2-20      | -                    |                       |                        |   |
|      |     | β-hairpin 77-87 |                      |                       | Inh<br><i>BH</i>       |   |
| uS8  | H   | glob. dom.      |                      | uS5<br><i>GH</i>      | uS17<br><i>GB</i>      |   |
|      |     | loop 63-82      | uS2<br><i>LG</i>     |                       |                        |   |
| uS9  | I   | glob. dom.      | uS7<br><i>GG</i>     |                       |                        |   |
|      |     | seg-C 97-126    |                      | uS10<br><i>SB</i>     | uS14<br><i>SS</i>      |   |
| uS10 | J   | glob. dom.      | uS3<br><i>GG</i>     |                       |                        |   |
|      |     | β-hairpin 43-67 | uS3<br><i>BG</i>     | uS9<br><i>BS</i>      | uS14<br><i>BH</i>      |   |
| uS11 | K   | glob. dom.      | uS7<br><i>GG</i>     | bS18<br><i>GS</i>     |                        |   |
|      |     | seg-C 110-126   | -                    |                       |                        |   |
| uS12 | L   | glob. dom.      | -                    |                       |                        |   |
|      |     | mix 5-32        | uS17<br><i>HB</i>    |                       |                        |   |
| uS13 | M   | glob. dom.      | -                    |                       |                        |   |
|      |     | mix-C 65-115    | uS19<br><i>HG/HS</i> | uL5(50S)<br><i>GG</i> | bL31(50S)<br><i>GG</i> |   |
| uS14 | N   | mix-N 2-61      | uS3<br><i>HG</i>     | uS9<br><i>SS</i>      | uS10<br><i>HB</i>      |   |
| uS15 | O   | glob. dom.      | bS6<br><i>GG</i>     |                       |                        |   |
| bS16 | P   | glob. dom.      | -                    |                       |                        |   |
| uS17 | Q   | glob. dom.      | -                    |                       |                        |   |
|      |     | β-hairpin 23-40 | uS8<br><i>BG</i>     | uS12<br><i>BH</i>     |                        |   |
| bS18 | R   | glob. dom.      | bS6<br><i>GG/GS</i>  |                       |                        |   |
|      |     | seg-C 77-87     |                      | uS11<br><i>SG</i>     |                        |   |
| uS19 | S   | glob. dom.      | uS13<br><i>GH</i>    |                       |                        |   |
|      |     | seg-C 75-84     | uS13<br><i>SH</i>    |                       |                        |   |
| S20  | T   | -               |                      |                       |                        |   |



**Table S9**

Properties of the ribosomal protein networks according to Barabasi et al. (2004) (reference 4 in Methods)

| network  | mean degree | avg clustering coef. | assortativity | gamma | beta | avg. shortest path | log(n) |
|----------|-------------|----------------------|---------------|-------|------|--------------------|--------|
| 60S euk. | 3,66        | 0,31                 | 0,18          | 2,52  | 0,25 | 3,3                | 3,56   |
| 40S euk. | 2,81        | 0,31                 | 0,15          | 2,64  | 1,05 | 3,54               | 3,26   |
| 50S eub. | 2,62        | 0,36                 | -0,02         | 1,23  | 1,86 | 2,73               | 2,56   |
| 30S eub. | 2,13        | 0,13                 | 0,24          | n/a   | n/a  | 4,26               | 2,71   |
| 50S arc. | 1,71        | 0                    | -0,16         | n/a   | n/a  | 2,66               | 2,64   |

**Table S10**

Motifs found in the protein ribosomal networks according to Alon et al. (2007) (reference 5 in Methods)

**60S eukarya**

size 3:

238 22 7.2+-2.2 6.67 0.000 7 125.71

size 4:

4958 123 53.0+-15.4 4.55 0.000 5 226.94

size 5:

**40S eukarya**

size 3:

238 14 3.6+-1.7 6.26 0.000 6 135.92

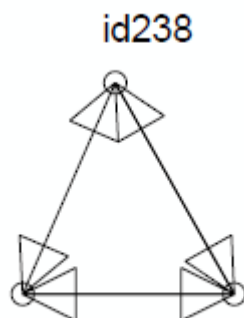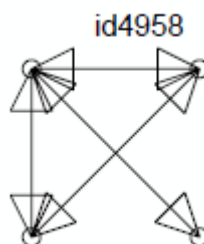

**Table S11**

List of the pdb structures of eubacterial 70S ribosomes and 50S subunits analysed. A brief summary about each structure is indicated: year of publication, resolution, space group, translation step, occupancy of tRNA sites and mRNA, translation factor and antibiotics.

| PDB_ID                 | Year | Resol. | Sp. Gr.                         | Functional state                    | tRNA       |            |     | mRNA | factor        | Antibiotic  |
|------------------------|------|--------|---------------------------------|-------------------------------------|------------|------------|-----|------|---------------|-------------|
|                        |      |        |                                 |                                     | A          | P          | E   |      |               |             |
| <i>T. Thermophilus</i> |      |        |                                 |                                     |            |            |     |      |               |             |
| 4V6F                   | 2010 | 3.1    | P2 <sub>1</sub> ,2 <sub>1</sub> | Elongation                          | phe        | phe        | phe | 30   |               |             |
| 4V6G                   | 2010 | 3.5    | P2 <sub>1</sub> ,2 <sub>1</sub> | Initiation                          |            | met        | met | 25   |               |             |
| 4V87                   | 2012 | 3.1    | P2 <sub>1</sub> ,2 <sub>1</sub> | Elongation decoding                 | leu        | met        | met | 10   |               |             |
| 4V8B                   | 2012 | 3.0    | P2 <sub>1</sub> ,2 <sub>1</sub> | Elongation decoding                 | leu<br>NC  | met        | met | 10   |               |             |
| 4V8C                   | 2012 | 3.3    | P2 <sub>1</sub> ,2 <sub>1</sub> | Elongation decoding                 | leu<br>NC  | met        | met | 10   |               | paromomycin |
| 4V8D                   | 2012 | 3.3    | P2 <sub>1</sub> ,2 <sub>1</sub> | Elongation decoding                 | tyr        | met        | tyr | 16   |               |             |
| 4V8E                   | 2012 | 3.3    | P2 <sub>1</sub> ,2 <sub>1</sub> | Elongation decoding                 | tyr<br>NC  | met        | tyr | 16   |               |             |
| 4V8F                   | 2012 | 3.3    | P2 <sub>1</sub> ,2 <sub>1</sub> | Elongation decoding                 | tyr<br>NC  | met        | tyr | 16   |               | paromomycin |
| 4V9A                   | 2013 | 3.3    | P2 <sub>1</sub> ,2 <sub>1</sub> | Initiation                          |            | met        |     | 4    |               | tetracyclin |
| 4V9B                   | 2013 | 3.1    | P2 <sub>1</sub> ,2 <sub>1</sub> | Initiation                          |            | met        |     | 6    |               | tigecyclin  |
| 4WQ1                   | 2015 | 3.1    | P2 <sub>1</sub> ,2 <sub>1</sub> | Elongation decoding                 | tyr<br>NC  | met        | tyr | 30   |               |             |
| 4WQR                   | 2015 | 3.1    | P2 <sub>1</sub> ,2 <sub>1</sub> | Elongation decoding                 | phe<br>NC  | met        | phe | 30   |               |             |
| 4WR6                   | 2015 | 3.05   | P2 <sub>1</sub> ,2 <sub>1</sub> | Elongation decoding                 | tyr<br>NC  | met        | tyr | 27   |               |             |
| 4WRA                   | 2015 | 3.05   | P2 <sub>1</sub> ,2 <sub>1</sub> | Elongation decoding                 | tyr<br>NC  | met        | tyr | 30   |               | paromomycin |
| 4WRO                   | 2015 | 3.05   | P2 <sub>1</sub> ,2 <sub>1</sub> | Elongation decoding                 | phe<br>NC  | met        | phe | 30   |               |             |
| 4WSD                   | 2015 | 2.95   | P2 <sub>1</sub> ,2 <sub>1</sub> | Elongation decoding                 | phe<br>NC  | met        | phe | 30   |               | paromomycin |
| 4WSM                   | 2015 | 3.3    | P2 <sub>1</sub> ,2 <sub>1</sub> | Elongation decoding                 | leu<br>NC  | leu        | leu | 60   |               |             |
| 4WT1                   | 2015 | 3.05   | P2 <sub>1</sub> ,2 <sub>1</sub> | Elongation decoding                 | phe<br>NC  | met        | phe | 27   |               |             |
| 4WU1                   | 2015 | 3.2    | P2 <sub>1</sub> ,2 <sub>1</sub> | Elongation decoding                 |            | tyr<br>NC  | tyr | 27   |               |             |
| 4WZD                   | 2015 | 3.1    | P2 <sub>1</sub> ,2 <sub>1</sub> | Elongation decoding                 |            | tyr        | tyr | 30   |               |             |
| 4WZO                   | 2015 | 3.3    | P2 <sub>1</sub> ,2 <sub>1</sub> | Elongation decoding                 | met        | met        | phe | 27   |               |             |
| 4V51                   | 2006 | 2.8    | P2 <sub>1</sub> ,2 <sub>1</sub> | Elongation PreItransloc             | asl<br>phe | met        | phe | 24   |               | paromomycin |
| 4V5A                   | 2007 | 3.5    | P2 <sub>1</sub> ,2 <sub>1</sub> | termination                         |            | asl<br>phe | met | 31   | RRF           |             |
| 4V5E                   | 2008 | 3.45   | P2 <sub>1</sub> ,2 <sub>1</sub> | Termination                         |            | phe        | phe | 8    | RF2           |             |
| 4V5C                   | 2009 | 3.3    | P2 <sub>1</sub> ,2 <sub>1</sub> | Elongation PostIpept transfer       | phe        | met        | phe | 10   |               | paromomycin |
| 4V5D                   | 2009 | 3.5    | P2 <sub>1</sub> ,2 <sub>1</sub> | Elongation PreIpept transf          | phe        | phe        | phe | 11   |               | paromomycin |
| 4V7J                   | 2009 | 3.3    | P2 <sub>1</sub> ,2 <sub>1</sub> | PreImRNA cleavage                   |            | met        | met | 25   | relE          |             |
| 4V5J                   | 2010 | 3.1    | P2 <sub>1</sub> ,2 <sub>1</sub> | Termination                         |            | phe        | phe | 8    | RF2           |             |
| 4V5L                   | 2010 | 3.1    | P12 <sub>1</sub> ,1             | Elongation decoding                 | trp        | phe        | phe | 14   | EF1Tu<br>GCP  | paromomycin |
| 4V5P                   | 2011 | 3.1    | P12 <sub>1</sub> ,1             | Elongation decoding                 | trp<br>NC  | phe        | phe | 27   | EF1Tu<br>GDP  | kirromycin  |
| 4V5Q                   | 2011 | 3.1    | P12 <sub>1</sub> ,1             | Elongation decoding                 | trp<br>NC  | phe        | phe | 27   | EF1Tu<br>GDP  | kirromycin  |
| 4V5S                   | 2011 | 3.1    | P12 <sub>1</sub> ,1             | Elongation decoding                 | Trp<br>NC  | phe        | phe | 27   | EF1Tu<br>GDP  | kirromycin  |
| 4V5R                   | 2011 | 3.1    | P12 <sub>1</sub> ,1             | Elongation decoding                 | trp        | phe        | phe | 27   | EF1Tu<br>GDP  | kirromycin  |
| 4V8Q                   | 2012 | 3.1    | P12 <sub>1</sub> ,1             | elongation                          | tm         | met        | met | 19   | EF1Tu<br>GDP  | Kirromycin  |
| 4V8N                   | 2013 | 3.1    | P2 <sub>1</sub> ,2 <sub>1</sub> | Elongation                          | ile        | ile        | ile | 24   |               |             |
| 4V9H                   | 2013 | 2.86   | P12 <sub>1</sub> ,1             | elongation P/E intermediate         |            | P/E<br>hyb |     | 25   | EF1G<br>GCP   |             |
| 4V9I                   | 2013 | 3.3    | P2 <sub>1</sub> ,2 <sub>1</sub> | elongation decoding                 | ser        | ser        | ser | 7    |               | paromomycin |
| 4V63                   | 2008 | 3.2    | P2 <sub>1</sub> ,2 <sub>1</sub> | Termination                         |            | met        | met | 27   | RF1           |             |
| 4V67                   | 2008 | 3.0    | P2 <sub>1</sub> ,2 <sub>1</sub> | Termination                         |            | met        | met | 27   | RF2           |             |
| 4V83                   | 2011 | 3.5    | P2 <sub>1</sub> ,2 <sub>1</sub> |                                     |            | IRES       |     |      |               |             |
| 4V84                   | 2011 | 3.4    | P2 <sub>1</sub> ,2 <sub>1</sub> |                                     |            | IRES       |     |      |               |             |
| 4V9N                   | 2013 | 3.4    | P2 <sub>1</sub> ,2 <sub>1</sub> | termination                         |            | met        |     | 10   | RF2           |             |
| 4V9Q                   | 2013 | 3.4    | P2 <sub>1</sub> ,2 <sub>1</sub> | Translation inhibition              |            | met        | met | 5    |               | Blasticidin |
| 4V90                   | 2013 | 2.95   | P12 <sub>1</sub> ,1             | PreItranslocation                   |            | P/E<br>hyb |     |      | EF1G<br>GCP   |             |
| 4V8X                   | 2013 | 3.35   | P2 <sub>1</sub> ,2 <sub>1</sub> | PreI mRNA cleavage                  |            | met        | met | 25   | YOEB          |             |
| 4V9K                   | 2013 | 3.5    | C121                            | Intermediate state of translocation |            | P/E<br>hyb |     | 23   | EF1G<br>GDPNP | viomycin    |



|      |      |      |          |                             |              |         |           |    |             |                    |
|------|------|------|----------|-----------------------------|--------------|---------|-----------|----|-------------|--------------------|
| 4V9L | 2013 | 3.5  | P2,2,2,1 | Pe*/E state                 |              | P/E hyb |           | 23 | EF1G<br>GDP | Fusidic<br>acid    |
| 1VVJ | 2014 | 3.44 | P2,2,2,1 | +1 frame shift<br>decoding  | ASL<br>SufA6 | met     |           | 18 |             | paromomycin        |
| 4L47 | 2014 | 3.22 | P2,2,2,1 | +1 frame shift<br>decoding  | ASL<br>SufA6 | met     |           | 18 |             | paromomycin        |
| 4LNT | 2014 | 2.94 | P2,2,2,1 | +1 frame shift<br>decoding  | ASL<br>SufA6 | met     |           | 18 |             | paromomycin        |
| 4LSK | 2014 | 3.48 | P2,2,2,1 | +1 frame shift<br>decoding  | ASL<br>SufA6 | met     |           | 17 |             |                    |
| 4TUE | 2014 | 3.5  |          | +1 frame shift<br>decoding  | ASL<br>SufJ  | met     |           | 25 |             | Paromomycin<br>PPU |
| 4ZER | 2015 | 3.1  | P2,2,2,1 | Translation<br>inhibition   |              | met     |           | 27 | Onc1112     |                    |
| 4V6A | 2009 | 3.1  | P2,2,2,1 | 1st peptide bond            |              | met     |           | 5  | EF1P        |                    |
| 4V7L | 2010 | 3.0  | P2,2,2,1 | Translocation<br>Inhibition | gln          | met     | gln       | 30 |             | viomycin           |
| 4V7W | 2010 | 3.0  | P2,2,2,1 |                             |              |         |           |    |             | chloramphenicol    |
| 4V7X | 2010 | 3.0  | P2,2,2,1 |                             |              |         |           |    |             | erythromycin       |
| 4V7Y | 2010 | 3.0  | P2,2,2,1 |                             |              |         |           |    |             | azithromycin       |
| 4V7Z | 2010 | 3.1  | P2,2,2,1 |                             |              |         |           |    |             | telithromycin      |
| 4V8A | 2012 | 3.2  | P2,2,2,1 |                             |              |         |           |    |             | thermorubin        |
| 4V8G | 2012 | 3.0  | P2,2,2,1 | stationary                  |              |         |           |    | RMF         |                    |
| 4V8H | 2012 | 3.1  | P2,2,2,1 | stationary                  |              |         |           |    | HPF         |                    |
| 4V8I | 2012 | 2.7  | P2,2,2,1 | stationary                  |              |         |           |    | YfiA        |                    |
| 4V95 | 2012 | 3.2  | P2,2,2,1 | stationary                  |              | met     |           | 16 | YaeJ        |                    |
| 1VY4 | 2014 | 2.6  | P2,2,2,1 | Pre lattach                 | phe          | met     | phe       | 24 |             |                    |
| 1VY5 | 2014 | 2.55 | P2,2,2,1 | Post lattach                | phe          | met     | phe       | 24 |             |                    |
| 1VY6 | 2014 | 2.9  | P2,2,2,1 | Pre lattach                 | Mimic        | met     |           | 24 |             |                    |
| 1VY7 | 2014 | 2.8  | P2,2,2,1 | Pre lattach                 | Mimic        | met     |           | 24 |             |                    |
| 4V9R | 2014 | 3.0  | P2,2,2,1 |                             |              | met     |           | 24 |             | dityromycin        |
| 4V9S | 2014 | 3.1  | P2,2,2,1 |                             |              | met     |           | 24 |             | GE82832            |
| 4W2E | 2014 | 2.9  | P2,2,2,1 | Back translocation          |              | phe     | phe       | 18 | EF14<br>GDP |                    |
| 4W2F | 2014 | 2.4  | P2,2,2,1 |                             | phe          | met     | phe       | 24 |             | amicoumacin        |
| 4W2G | 2014 | 2.55 | P2,2,2,1 |                             | phe          | met     | phe       | 24 |             | pactamycin         |
| 4W2H | 2014 | 2.7  | P2,2,2,1 |                             |              | met     | Phe<br>aS | 24 |             | pactamycin         |
| 4W2I | 2014 | 2.7  | P2,2,2,1 |                             | phe          | met     | phe       | 24 |             | negamycin          |
| 4WP0 | 2015 | 2.8  | P2,2,2,1 | Pre-translocation           | phe          | met     | phe       | 24 | EF1G<br>GDP |                    |
| 4WQF | 2015 | 2.8  | P2,2,2,1 | Post-translocation          |              | met     | phe       | 18 | EF1G<br>GDP | Fusidic<br>acid    |
| 4WQU | 2015 | 2.8  | P2,2,2,1 | Post-translocation          |              | phe     | phe       | 18 | EF1G<br>GDP | dityromycin        |
| 4Y40 | 2015 | 2.3  | P2,2,2,1 |                             |              |         |           |    | YfiA        |                    |
| 4Y4P | 2015 | 2.5  | P2,2,2,1 |                             | phe          | met     | phe       | 24 |             |                    |
| 4Z3Q | 2015 | 2.6  | P2,2,2,1 |                             | phe          | met     | phe       | 24 |             | hygromycin         |
| 4Z3R | 2015 | 3.1  | P2,2,2,1 |                             |              |         |           |    |             | hygromycin         |
| 4Z3S | 2015 | 2.6  | P2,2,2,1 |                             | phe          | met     | phe       | 27 |             | 4M2                |
| 4Z8C | 2015 | 2.5  | P2,2,2,1 |                             |              | met     |           | 24 |             | oncocin            |

#### *D. radiodurans*

|      |      |      |      |     |  |  |  |  |  |                          |
|------|------|------|------|-----|--|--|--|--|--|--------------------------|
| 2ZJR | 2008 | 2.9  | I222 | 50S |  |  |  |  |  |                          |
| 2ZJQ | 2008 | 3.3  | I222 | 50S |  |  |  |  |  | micrococin               |
| 3CF5 | 2008 | 3.3  | I222 | 50S |  |  |  |  |  | thiostrepton             |
| 3PIO | 2011 | 3.25 | I222 | 50S |  |  |  |  |  | Lankamycin<br>lankacidin |
| 4IO9 | 2013 | 3.2  | I222 | 50S |  |  |  |  |  | erythromycin             |
| 4IOA | 2013 | 3.2  | I222 | 50S |  |  |  |  |  | 4e                       |
| 5DM6 | 2015 | 2.9  | I222 | 50S |  |  |  |  |  |                          |

#### *E. coli*

|      |      |      |          |                            |  |     |  |    |              |                              |
|------|------|------|----------|----------------------------|--|-----|--|----|--------------|------------------------------|
| 4V52 | 2007 | 3.2  | P2,2,2,1 |                            |  |     |  |    |              | neomycin                     |
| 4V54 | 2007 | 3.3  | P2,2,2,1 | termination                |  |     |  |    | RRF          |                              |
| 4V57 | 2007 | 3.5  | P2,2,2,1 |                            |  |     |  |    |              | neomycin<br>spectinomycin    |
| 4V64 | 2008 | 3.5  | P2,2,2,1 |                            |  |     |  |    |              | Hygromycin B                 |
| 4V6C | 2009 | 3.19 | P2,2,2,1 | intermediate<br>ratcheting |  |     |  |    |              |                              |
| 4V7U | 2010 | 3.1  | P2,2,2,1 |                            |  |     |  |    |              | erythromycin                 |
| 4V7S | 2010 | 3.25 | P2,2,2,1 |                            |  |     |  |    |              | telithromycin                |
| 4V7V | 2010 | 3.29 | P2,2,2,1 |                            |  |     |  |    |              | clindamycin                  |
| 4V7T | 2010 | 3.19 | P2,2,2,1 |                            |  |     |  |    |              | chloramphenicol              |
| 4www | 2010 | 3.1  | P2,2,2,1 |                            |  |     |  |    |              | CEM1101                      |
| 4V9D | 2011 | 3.0  | P2,2,2,1 | termination                |  | phe |  | 16 | RRF          |                              |
| 4V85 | 2012 | 3.2  | P2,2,2,1 | termination                |  |     |  | 27 | RF3<br>GDPNP | viomycin                     |
| 4V9C | 2012 | 3.3  | P2,2,2,1 | termination                |  | phe |  | 24 | RRF          | neomycin                     |
| 4V9O | 2013 | 2.9  | P12,1    | Subunit rotation           |  |     |  |    | EF1G<br>GCP  | viomycin                     |
| 4UIU | 2014 | 2.95 | P2,2,2,1 |                            |  |     |  |    |              | quinupristin                 |
| 4UIV | 2014 | 3.0  | P2,2,2,1 |                            |  |     |  |    |              | linopristin                  |
| 4U20 | 2014 | 2.9  | P2,2,2,1 |                            |  |     |  |    |              | flopristin                   |
| 4U24 | 2014 | 2.9  | P2,2,2,1 |                            |  |     |  |    |              | daflopristin                 |
| 4U25 | 2014 | 2.9  | P2,2,2,1 |                            |  |     |  |    |              | virginamycin                 |
| 4U26 | 2014 | 2.8  | P2,2,2,1 |                            |  |     |  |    |              | daflopristin<br>quinupristin |
| 4U27 | 2014 | 2.8  | P2,2,2,1 |                            |  |     |  |    |              | Flopristin<br>linopristin    |
| 4WF1 | 2014 | 3.1  | P2,2,2,1 |                            |  |     |  |    |              | negamycin                    |
| 4WOI | 2015 | 3.0  | P2,2,2,1 | termination                |  | phe |  | 16 | RRF          | paromycin                    |
| 4YBB | 2015 | 2.1  | P2,2,2,1 |                            |  |     |  |    |              |                              |

**Table S12**

Conserved residues at the interfaces of the interacting proteins within the 50S eubacterial subunit. Left column: residues found in the interface. Right column: conserved interface residues. Residues whose properties conserved are underlined and strictly conserved residues are written in bold. AR: conserved aromatic residues; BA: conserved basic residues; AC: conserved acid residues; HP: conserved hydrophobic residues; PO: conserved polar residues; SM: conserved small chain residues. See also figure uS5 that displays the consensus sequence from sequence alignments (reference 6 in Methods).

| Interface residues |            |            |            |            |     | Conserved residues |                |               |            |
|--------------------|------------|------------|------------|------------|-----|--------------------|----------------|---------------|------------|
| <b>bL20-uL4</b>    |            |            |            |            |     |                    |                |               |            |
| <b>bL20</b>        | <u>pro</u> |            |            |            |     | pro/ala            |                |               |            |
|                    | 2          |            |            |            |     | 2                  |                |               |            |
| <b>uL4</b>         | <b>arg</b> | ala        | <u>pro</u> |            |     | <b>arg</b>         | <u>pro/ala</u> |               |            |
|                    | 45         | 49         | 92         |            |     | 45                 | 92             |               |            |
| <b>bL32-bL20</b>   |            |            |            |            |     |                    |                |               |            |
| <b>bL32</b>        | <u>lys</u> | <u>ser</u> | <u>lys</u> | <u>ala</u> |     | <b>BA</b>          | <u>ser</u>     | <b>BA</b>     | <u>SM</u>  |
|                    | 10         | 12         | 13         | 14         |     | 10                 | 12             | 13            | 14         |
| <b>bL20</b>        | <u>trp</u> | <b>gly</b> | leu        | <u>lys</u> |     | <u>AR/arg</u>      | <u>BA/asn</u>  |               |            |
|                    | 25         | 26         | 27         | 30         |     | 25                 | 30             |               |            |
| <b>uL13-bL21</b>   |            |            |            |            |     |                    |                |               |            |
| <b>uL13</b>        | <u>met</u> |            |            |            |     | <u>met</u>         |                |               |            |
|                    | 1          |            |            |            |     | 1                  |                |               |            |
| <b>bL21</b>        | <u>gln</u> | <u>tyr</u> | <b>arg</b> | <u>leu</u> |     | <u>gln</u>         | <b>AR</b>      | <b>BA</b>     | <b>HP</b>  |
|                    | 11         | 12         | 13         | 20         |     | 11                 | 12             | 13            | 20         |
| <b>uL15-bL21</b>   |            |            |            |            |     |                    |                |               |            |
| <b>uL15</b>        | pro        | <u>gly</u> | <u>lys</u> |            |     | <u>gly</u>         | <u>lys</u>     |               |            |
|                    | 23         | 24         | 29         |            |     | 24                 | 29             |               |            |
| <b>bL21</b>        | <u>gln</u> | <b>arg</b> | <b>arg</b> |            |     | <u>PO</u>          | <b>BA</b>      | <b>BA</b>     |            |
|                    | 80         | 82         | 83         |            |     | 80                 | 82             | 83            |            |
| <b>uL3-bL17</b>    |            |            |            |            |     |                    |                |               |            |
| <b>uL3</b>         | <u>lys</u> | <u>gly</u> | <u>arg</u> | <u>lys</u> |     | <u>lys</u>         | <u>gly</u>     | <b>BA</b>     | <u>lys</u> |
|                    | 109        | 110        | 111        | 118        |     | 109                | 110            | 111           | 118        |
| <b>bL17</b>        | <u>met</u> | <u>his</u> |            |            |     | met                | <u>his</u>     |               |            |
|                    | 1          | 3          |            |            |     | 1                  | 3              |               |            |
| <b>bL17-uL22</b>   |            |            |            |            |     |                    |                |               |            |
| <b>bL17</b>        | <u>ala</u> | glu        | arg        | <b>arg</b> | arg | <b>gly</b>         | <b>arg</b>     | <b>gly</b>    |            |
|                    | 101        | 102        | 103        | 104        | 105 | 106                |                |               |            |
| <b>uL22</b>        | <u>arg</u> | <b>tyr</b> | <u>asn</u> | <b>arg</b> |     |                    | <u>PO</u>      | <b>AR</b>     | <u>PO</u>  |
|                    | 37         | 38         | 40         | 42         |     |                    | 37             | 38            | 40         |
| <b>uL3-uL14</b>    |            |            |            |            |     |                    |                |               |            |
| <b>uL3</b>         | <u>arg</u> | <b>phe</b> | <u>asp</u> | <u>arg</u> | ala | <u>arg/gln</u>     | <b>AR</b>      | AC/PO         | <u>PO</u>  |
|                    | 13         | 15         | 18         | 19         | 20  | 13                 | 15             | 18            | 19         |
| <b>uL14</b>        | pro        | <u>asp</u> | <u>gly</u> |            |     | <u>asp</u>         | <u>gly</u>     |               |            |
|                    | 72         | 73         | 74         |            |     | 73                 | 74             |               |            |
| <b>uL3-uL13</b>    |            |            |            |            |     |                    |                |               |            |
| <b>uL13</b>        | <b>tyr</b> | gly        | <b>tyr</b> | <u>pro</u> |     | <b>AR</b>          | <b>AR</b>      | <u>pro/HP</u> |            |
|                    | 75         | 77         | 78         | 79         |     | 75                 | 78             | 79            |            |
| <b>uL3</b>         | <b>arg</b> | <b>tyr</b> | <u>lys</u> | <u>gly</u> |     | <b>BA</b>          | <b>AR</b>      | <u>lys</u>    | <u>gly</u> |
|                    | 149        | 151        | 152        | 153        |     | 149                | 151            | 152           | 153        |



|                  |            |            |            |            |            |            |            |            |                |                |                |                |            |             |            |
|------------------|------------|------------|------------|------------|------------|------------|------------|------------|----------------|----------------|----------------|----------------|------------|-------------|------------|
| <b>uL23-uL29</b> |            |            |            |            |            |            |            |            |                |                |                |                |            |             |            |
| <b>uL23</b>      | met        | thr        | tyr        | asp        | <u>ile</u> | leu        | ala        | <b>pro</b> | <u>PO</u>      | <b>ile</b>     | <b>pro</b>     |                |            |             |            |
|                  | 1          | 3          | 5          | 6          | 8          | 9          | 10         | 11         | 6              | 8              | 11             |                |            |             |            |
|                  | <u>leu</u> | <b>phe</b> | <u>ala</u> | <b>phe</b> | lys        | ala        | <u>leu</u> | <u>leu</u> | <b>HP</b>      | <b>phe</b>     | <u>HP</u>      | <u>HP</u>      | <u>HP</u>  | <u>HP</u>   |            |
|                  | 13         | 28         | 46         | 47         | 48         | 91         | 92         | 95         | 13             | 28             | 46             | 92             | 95         |             |            |
| <b>uL29</b>      | <u>glu</u> | <b>val</b> | arg        | <b>lys</b> | <u>arg</u> | leu        | met        | <b>arg</b> | <u>PO</u>      | <b>HP</b>      | <u>lys/leu</u> | <u>PO</u>      | <b>AR</b>  | <b>arg</b>  |            |
|                  | 22         | 25         | 26         | 29         | 30         | 32         | 33         | 36         | 22             | 25             | 29             | 30             | 33         | 36          |            |
|                  | <b>phe</b> | ser        | ile        | leu        | leu        | arg        |            |            | <b>HP</b>      |                |                |                |            |             |            |
|                  | 37         | 40         | 41         | 61         | 64         | 68         |            |            | 37             |                |                |                |            |             |            |
| <b>uL13-bL20</b> |            |            |            |            |            |            |            |            |                |                |                |                |            |             |            |
| <b>uL13</b>      | met        | <u>lys</u> | <b>thr</b> | <b>tyr</b> | val        |            |            |            | <u>lys/thr</u> | <b>thr</b>     | <b>AR</b>      |                |            |             |            |
|                  | 1          | 2          | 3          | 4          | 5          |            |            |            | 2              | 3              | 4              |                |            |             |            |
|                  | <b>lys</b> | <u>his</u> | <b>arg</b> | <u>pro</u> | asp        | <b>trp</b> | <b>thr</b> | <b>pro</b> | <b>lys</b>     | <u>his/asn</u> | <u>pro/ala</u> | <b>BA</b>      | <b>AR</b>  | <b>thr</b>  | <b>pro</b> |
|                  | 37         | 38         | 39         | 40         | 41         | 42         | 43         | 44         | 37             | 38             | 40             | 39             | 42         | 43          | 44         |
| <b>bL20</b>      | <b>phe</b> | <u>leu</u> | <b>trp</b> | val        | <b>arg</b> | <b>ala</b> | ala        | gln        | <b>phe</b>     | <u>leu</u>     | <b>trp</b>     | <b>arg</b>     | <b>ala</b> | <b>ala</b>  |            |
|                  | 57         | 60         | 61         | 63         | 64         | 67         | 68         | 71         | 57             | 60             | 61             | 64             | 67         | 68          |            |
|                  | <b>lys</b> | asn        | ala        | <b>asp</b> | <b>ala</b> | <b>val</b> | arg        |            | <b>lys</b>     | <b>AC</b>      | <b>ala</b>     | <b>HP</b>      |            |             |            |
|                  | 93         | 94         | 96         | 97         | 99         | 100        | 101        |            | 93             | 97             | 99             | 100            |            |             |            |
| <b>uL3-bL19</b>  |            |            |            |            |            |            |            |            |                |                |                |                |            |             |            |
| <b>uL3</b>       | val        | <b>lys</b> | <b>val</b> | <b>gly</b> | <b>met</b> | <b>thr</b> | arg        | <b>ile</b> | <b>lys</b>     | <b>HP</b>      | <b>gly</b>     | <b>met</b>     | <b>thr</b> | arg/<br>gln | <b>HP</b>  |
|                  | 7          | 8          | 9          | 10         | 11         | 12         | 13         | 14         | 8              | 9              | 10             | 11             | 12         | 13          | 14         |
|                  | <b>phe</b> | <u>asp</u> | <u>asp</u> | arg        | <b>val</b> | leu        | leu        | <u>asp</u> | <b>AR</b>      | <u>PO</u>      | <u>PO</u>      | <b>HP</b>      | <u>PO</u>  |             |            |
|                  | 15         | 17         | 18         | 19         | 25         | 27         | 52         | 174        | 15             | 17             | 18             | 25             | 174        |             |            |
|                  | ile        | glu        | <b>leu</b> | <b>leu</b> | <u>asn</u> | <u>gly</u> |            |            | <b>HP</b>      | <b>HP</b>      | <u>PO</u>      | <u>gly/PO</u>  |            |             |            |
|                  | 176        | 179        | 181        | 183        | 192        | 193        |            |            | 181            | 183            | 192            | 193            |            |             |            |
| <b>bL19</b>      | met        | arg        | <b>leu</b> | <b>ile</b> | leu        | <b>val</b> | gln        | arg        | <b>HP</b>      | <b>ile</b>     | <b>HP</b>      | <u>glu/PO</u>  | <u>PO</u>  |             |            |
|                  | 1          | 3          | 6          | 7          | 9          | 10         | 11         | 13         | 6              | 7              | 10             | 11             | 13         |             |            |
|                  | tyr        | <b>lys</b> | lys        | <u>thr</u> | <b>phe</b> | <u>asn</u> | <u>thr</u> | pro        | <b>BA/AR</b>   | <u>PO</u>      | <b>HP</b>      | <u>PO</u>      | <u>SM</u>  |             |            |
|                  | 14         | 33         | 35         | 40         | 57         | 58         | 60         | 77         | 33             | 40             | 57             | 58             | 60         |             |            |
|                  | <b>his</b> | <b>ser</b> | <b>pro</b> | leu        |            |            |            |            | <b>AR/PO</b>   | <u>ser/thr</u> | <b>pro</b>     |                |            |             |            |
|                  | 79         | 80         | 81         | 82         |            |            |            |            | 79             | 80             | 81             |                |            |             |            |
| <b>uL15-bL35</b> |            |            |            |            |            |            |            |            |                |                |                |                |            |             |            |
| <b>uL15</b>      | pro        | arg        | <u>arg</u> | <b>phe</b> | <b>glu</b> | <u>arg</u> | <b>thr</b> | leu        | <b>gly</b>     | <b>phe</b>     | <b>glu</b>     | <b>gln</b>     |            |             |            |
|                  | 48         | 49         | 50         | 51         | 52         | 55         | 58         | 59         | 50             | 51             | 52             | 55             |            |             |            |
|                  | met        | <b>arg</b> | <b>leu</b> | <b>pro</b> | <b>lys</b> | <b>arg</b> | gln        |            | <b>arg</b>     | <b>leu</b>     | <b>pro</b>     | <b>lys</b>     |            |             |            |
|                  | 60         | 61         | 62         | 63         | 64         | 65         | 68         |            | 61             | 62             | 63             | 64             |            |             |            |
| <b>bL35</b>      | <b>met</b> | <b>lys</b> | <b>his</b> | <u>gly</u> | <u>ala</u> | lys        | <b>lys</b> | <b>arg</b> | <b>HP</b>      | <b>lys</b>     | <b>BA</b>      | <u>SM</u>      | <u>SM</u>  | <b>lys</b>  | <b>arg</b> |
|                  | 4          | 5          | 7          | 9          | 10         | 11         | 12         | 13         | 4              | 5              | 7              | 9              | 10         | 12          | 13         |
|                  | <u>val</u> | ala        | met        | <u>lys</u> | <u>thr</u> | <u>arg</u> | lys        | phe        | <b>phe</b>     | <u>PO</u>      | <u>SM</u>      | <u>arg/ser</u> |            |             |            |
|                  | 14         | 24         | 25         | 26         | 27         | 30         | 47         | 48         | 14             | 26             | 27             | 30             |            |             |            |
|                  | <b>leu</b> | <b>glu</b> | arg        | <b>ile</b> | leu        | <b>leu</b> |            |            | <b>HP</b>      | <b>glu</b>     | <b>HP</b>      | <b>HP</b>      |            |             |            |
|                  | 50         | 54         | 57         | 58         | 60         | 61         |            |            | 50             | 54             | 58             | 61             |            |             |            |



**Table S13**

New nomenclature for proteins of the small subunit (adapted from reference 35)

| New Name     | Taxonomic Range | Bacteria | Yeast | Human |
|--------------|-----------------|----------|-------|-------|
| <b>bS1</b>   | B               | S1       | -     | -     |
| <b>eS1</b>   | A E             | -        | S1    | S3A   |
| <b>uS2</b>   | B A E           | S2       | S0    | SA    |
| <b>uS3</b>   | B A E           | S3       | S3    | S3    |
| <b>uS4</b>   | B A E           | S4       | S9    | S9    |
| <b>eS4</b>   | A E             | -        | S4    | S4    |
| <b>uS5</b>   | B A E           | S5       | S2    | S2    |
| <b>bS6</b>   | B               | S6       | -     | -     |
| <b>eS6</b>   | A E             | -        | S6    | S6    |
| <b>uS7</b>   | B A E           | S7       | S5    | S5    |
| <b>eS7</b>   | E               | -        | S7    | S7    |
| <b>uS8</b>   | B A E           | S8       | S22   | S15A  |
| <b>eS8</b>   | A E             | -        | S8    | S8    |
| <b>uS9</b>   | B A E           | S9       | S16   | S16   |
| <b>uS10</b>  | B A E           | S10      | S20   | S20   |
| <b>eS10</b>  | E               | -        | S10   | S10   |
| <b>uS11</b>  | B A E           | S11      | S14   | S14   |
| <b>uS12</b>  | B A E           | S12      | S23   | S23   |
| <b>eS12</b>  | E               | -        | S12   | S12   |
| <b>uS13</b>  | B A E           | S13      | S18   | S18   |
| <b>uS14</b>  | B A E           | S14      | S29   | S29   |
| <b>uS15</b>  | B A E           | S15      | S13   | S13   |
| <b>bS16</b>  | B               | S16      | -     | -     |
| <b>uS17</b>  | B A E           | S17      | S11   | S11   |
| <b>eS17</b>  | A E             | -        | S17   | S17   |
| <b>bS18</b>  | B               | S18      | -     | -     |
| <b>uS19</b>  | B A E           | S19      | S15   | S15   |
| <b>eS19</b>  | A E             | -        | S19   | S19   |
| <b>bS20</b>  | B               | S20      | -     | -     |
| <b>bS21</b>  | B               | S21      | -     | -     |
| <b>bTHX</b>  | B               | THX      | -     | -     |
| <b>eS21</b>  | E               | -        | S21   | S21   |
| <b>eS24</b>  | A E             | -        | S24   | S24   |
| <b>eS25</b>  | A E             | -        | S25   | S25   |
| <b>eS26</b>  | E               | -        | S26   | S26   |
| <b>eS27</b>  | A E             | -        | S27   | S27   |
| <b>eS28</b>  | A E             | -        | S28   | S28   |
| <b>eS30</b>  | A E             | -        | S30   | S30   |
| <b>eS31</b>  | A E             | -        | S31   | S27A  |
| <b>RACK1</b> | E               | -        | Asc1  | RACK1 |

**Table S14**

New nomenclature for proteins of the large subunit (adapted from reference 35)

| New name | Taxonomic range | Bacteria | Yeast       | Human                    |
|----------|-----------------|----------|-------------|--------------------------|
| uL1      | B A E           | L1       | L1          | L10A                     |
| uL2      | B A E           | L2       | L2          | L8                       |
| uL3      | B A E           | L3       | L3          | L3                       |
| uL4      | B A E           | L4       | L4          | L4                       |
| uL5      | B A E           | L5       | L11         | L11                      |
| uL6      | B A E           | L6       | L9          | L9                       |
| eL6      | E               | -        | L6          | L6                       |
| eL8      | A E             | -        | L8          | L7A                      |
| bL9      | B               | L9       | -           | -                        |
| uL10     | B A E           | L10      | P0          | P0                       |
| uL11     | B A E           | L11      | L12         | L12                      |
| bL12     | B               | L7/L12   | -           | -                        |
| uL13     | B A E           | L13      | L16         | L13A                     |
| eL13     | A E             | -        | L13         | L13                      |
| uL14     | B A E           | L14      | L23         | L23                      |
| eL14     | A E             | -        | L14         | L14                      |
| uL15     | B A E           | L15      | L28         | L27A                     |
| eL15     | A E             | -        | L15         | L15                      |
| uL16     | B A E           | L16      | L10         | L10                      |
| bL17     | B               | L17      | -           | -                        |
| uL18     | B A E           | L18      | L5          | L5                       |
| eL18     | A E             | -        | L18         | L18                      |
| bL19     | B               | L19      | -           | -                        |
| eL19     | A E             | -        | L19         | L19                      |
| bL20     | B               | L20      | -           | -                        |
| eL20     | A E             | -        | L20         | L18A                     |
| bL21     | B               | L21      | -           | -                        |
| eL21     | A E             | -        | L21         | L21                      |
| uL22     | B A E           | L22      | L17         | L17                      |
| eL22     | E               | -        | L22         | L22                      |
| uL23     | B A E           | L23      | L25         | L23A                     |
| uL24     | B A E           | L24      | L26         | L26                      |
| eL24     | A E             | -        | L24         | L24                      |
| bL25     | B               | L25      | -           | -                        |
| bL27     | B               | L27      | -           | -                        |
| eL27     | E               | -        | L27         | L27                      |
| bL28     | B               | L28      | -           | -                        |
| eL28     | E               | -        | -           | L28                      |
| uL29     | B A E           | L29      | L35         | L35                      |
| eL29     | E               | -        | L29         | L29                      |
| uL30     | B A E           | L30      | L7          | L7                       |
| eL30     | A E             | -        | L30         | L30                      |
| bL31     | B               | L31      | -           | -                        |
| eL31     | A E             | -        | L31         | L31                      |
| bL32     | B               | L32      | -           | -                        |
| eL32     | A E             | -        | L32         | L32                      |
| bL33     | B               | L33      | -           | -                        |
| eL33     | A E             | -        | L33         | L35A                     |
| bL34     | B               | L34      | -           | -                        |
| eL34     | A E             | -        | L34         | L34                      |
| bL35     | B               | L35      | -           | -                        |
| bL36     | B               | L36      | -           | -                        |
| eL36     | E               | -        | L36         | L36                      |
| eL37     | A E             | -        | L37         | L37                      |
| eL38     | A E             | -        | L38         | L38                      |
| eL39     | A E             | -        | L39         | L39                      |
| eL40     | A E             | -        | L40         | L40                      |
| eL41     | A E             | -        | L41         | L41                      |
| eL42     | A E             | -        | L42         | L36A                     |
| eL43     | A E             | -        | L43         | L37A                     |
| P1/P2    | A E             | -        | P1/P2 (A/B) | P1/P2 ( $\alpha/\beta$ ) |

**Table S15**

Status of the pdb models when different conformations are observed at protein-protein interfaces of 50S subunits and 70S eubacterial ribosomes.

For each protein-pairs where different conformations have been observed, the status of the models is noted as follow: white: correct model; “?” and green: the map is not incompatible with the different model built in the map; “-” and yellow: non-interpretable electron density map in the corresponding region; “x” and red: incorrect model, the model is not correctly fitted into its density map. For uL16-bL27, the “S” indicates that bL27 is fully structured at the interface (see also Supplementary fig. S10 that display the correct and incorrect (x) model found in the twelve protein-protein contact regions that display different conformation

| PDB_ID                | Year | Res. | Sp. Gr  | tRNA |      |     |      |      |      |      |      |      |      |      |      |      |      |      |      |
|-----------------------|------|------|---------|------|------|-----|------|------|------|------|------|------|------|------|------|------|------|------|------|
|                       |      |      |         | A    | P    | E   | 1    | 2    | 3    | 4    | 5    | 6    | 7    | 8    | 9    | 10   | 11   | 12   |      |
|                       |      |      |         |      |      |     | uL3  | uL13 | uL13 | uL15 | uL15 | bL35 | bL17 | uL3  | uL14 | bL17 | bL20 | uL16 | uL23 |
|                       |      |      |         |      |      |     | uL13 | bL20 | bL21 | bL21 | bL35 | bL33 | uL3  | uL14 | bL32 | uL4  | bL27 | uL29 |      |
| <b>T.Thermophilus</b> |      |      |         |      |      |     |      |      |      |      |      |      |      |      |      |      |      |      |      |
| 4V6F_1                | 2010 | 3.1  | P2,2,2, | phe  | phe  | phe |      |      |      | ?    |      | -    |      |      |      | x    |      | x    | x    |
| 4V6F_2                |      |      |         |      |      |     |      |      |      |      | x    | -    |      |      |      | x    |      | x    | x    |
| 4V6G_1                | 2010 | 3.5  | P2,2,2, |      | met  | met |      |      |      | ?    |      |      |      |      |      | x    |      | x    | x    |
| 4V6G_2                |      |      |         |      |      |     |      |      |      |      | x    | -    |      |      |      | x    |      | x    | x    |
| 4V87_1                | 2012 | 3.1  | P2,2,2, | leu  | met  | met |      |      |      | ?    |      | -    |      |      |      | x    |      |      | x    |
| 4V87_2                |      |      |         |      |      |     |      |      |      |      |      | -    |      |      |      | x    |      |      | x    |
| 4V8B_1                | 2012 | 3.0  | P2,2,2, | leu  | met  | met |      |      |      | ?    |      | -    |      |      |      | x    |      | x    | x    |
| 4V8B_2                |      |      |         | NC   |      |     |      |      |      |      |      | -    |      |      |      | x    |      | x    | x    |
| 4V8C_1                | 2012 | 3.3  | P2,2,2, | leu  | met  | met |      |      |      | ?    |      | -    |      |      |      | x    |      |      | x    |
| 4V8C_2                |      |      |         | NC   |      |     |      |      |      |      |      | -    |      |      |      | x    |      |      | x    |
| 4V8D_1                | 2012 | 3.3  | P2,2,2, | tyr  | met  | tyr |      |      |      | ?    |      | -    |      |      |      | x    |      |      | x    |
| 4V8D_2                |      |      |         |      |      |     |      |      |      |      |      | -    |      |      |      | x    |      |      | x    |
| 4V8E_1                | 2012 | 3.3  | P2,2,2, | tyr  | met  | tyr |      |      |      | ?    |      | -    |      |      |      | x    |      |      | x    |
| 4V8E_2                |      |      |         | NC   |      |     |      |      |      |      |      | -    |      |      |      | x    |      |      | x    |
| 4V8F_1                | 2012 | 3.3  | P2,2,2, | tyr  | met  | tyr |      |      |      | ?    |      | -    |      |      |      | x    |      |      | x    |
| 4V8F_2                |      |      |         | NC   |      |     |      |      |      |      |      | -    |      |      |      | x    |      |      | x    |
| 4V9A_1                | 2013 | 3.3  | P2,2,2, |      | met  |     |      |      |      | ?    |      | -    |      |      |      | x    |      |      | x    |
| 4V9A_2                |      |      |         |      |      |     |      |      |      |      |      | -    |      |      |      | x    |      |      | x    |
| 4V9B_1                | 2013 | 3.1  | P2,2,2, |      | met  |     |      |      |      | ?    |      | -    |      |      |      | x    |      |      | x    |
| 4V9B_2                |      |      |         |      |      |     |      |      |      |      |      | -    |      |      |      | x    |      |      | x    |
| 4WQ1_1                | 2015 | 3.1  | P2,2,2, | tyr  | met  | tyr |      |      |      | ?    |      | -    |      |      |      | x    |      |      | x    |
| 4WQ1_2                |      |      |         | NC   |      |     |      |      |      |      |      | -    |      |      |      | x    |      |      | x    |
| 4WQR_1                | 2015 | 3.1  | P2,2,2, | phe  | met  | phe |      |      |      | ?    |      | -    |      |      |      | x    |      |      | x    |
| 4WQR_2                |      |      |         | NC   |      |     |      |      |      |      |      | -    |      |      |      | x    |      |      | x    |
| 4WR6_1                | 2015 | 3.05 | P2,2,2, | tyr  | met  | tyr |      |      |      | ?    |      | -    |      |      |      | x    |      |      | x    |
| 4WR6_2                |      |      |         | NC   |      |     |      |      |      |      |      | -    |      |      |      | x    |      |      | x    |
| 4WRA_1                | 2015 | 3.05 | P2,2,2, | tyr  | met  | tyr |      |      |      | ?    |      | -    |      |      |      | x    |      |      | x    |
| 4WRA_2                |      |      |         | NC   |      |     |      |      |      |      |      | -    |      |      |      | x    |      |      | x    |
| 4WRO                  | 2015 | 3.05 | P2,2,2, | phe  | met  | phe |      |      |      | ?    |      | -    |      |      |      | x    |      |      | x    |
| 4WSD_1                | 2015 | 2.95 | P2,2,2, | phe  | met  | phe |      |      |      | ?    |      | -    |      |      |      | x    |      |      | x    |
| 4WSD_2                |      |      |         | NC   |      |     |      |      |      |      |      | -    |      |      |      | x    |      |      | x    |
| 4WSM_1                | 2015 | 3.3  | P2,2,2, | leu  | leu  | leu |      |      |      | ?    |      | -    |      |      |      | x    |      |      | x    |
| 4WSM_2                |      |      |         | NC   |      |     |      |      |      |      |      | -    |      |      |      | x    |      |      | x    |
| 4WT1_1                | 2015 | 3.05 | P2,2,2, | phe  | met  | phe |      |      |      | ?    |      | -    |      |      |      | x    |      | 1    | x    |
| 4WT1_2                |      |      |         | NC   |      |     |      |      |      |      |      | -    |      |      |      | x    |      | 1    | x    |
| 4WU1_1                | 2015 | 3.2  | P2,2,2, |      | tyr  | tyr |      |      |      | ?    |      | -    |      |      |      | x    |      |      | x    |
| 4WU1_2                |      |      |         | NC   |      |     |      |      |      |      |      | -    |      |      |      | x    |      |      | x    |
| 4WZD_1                | 2015 | 3.1  | P2,2,2, |      | tyr  | tyr |      |      |      | ?    |      | -    |      |      |      | x    |      | S    | x    |
| 4WZD_2                |      |      |         |      |      |     |      |      |      |      |      | -    |      |      |      | x    |      |      | x    |
| 4WZO_1                | 2015 | 3.3  | P2,2,2, | met  | met  | phe |      |      |      | ?    |      | -    |      |      |      | x    |      | 1    | x    |
| 4WZO_2                |      |      |         |      |      |     |      |      |      |      |      | -    |      |      |      | x    |      | 1    | x    |
| 4V51                  | 2006 | 2.8  | P2,2,2, | asl  | met  | phe |      |      |      | x    | -    | x    | -    | x    |      | x    |      | -    | -    |
| 4V5A                  | 2007 | 3.5  | P2,2,2, | phe  | asl  | met |      |      |      | x    | -    | x    | -    | x    |      | x    |      | -    | -    |
| 4V5E                  | 2008 | 3.45 | P2,2,2, |      | phe  | phe |      |      |      |      | x    | -    | x    |      | x    |      |      |      | x    |
| 4V5C                  | 2009 | 3.3  | P2,2,2, | phe  | met  | phe |      |      |      | x    | -    | x    | -    | x    |      | x    |      | S    | x    |
| 4V5D                  | 2009 | 3.5  | P2,2,2, | phe  | phe  | phe |      |      |      | x    | -    | x    | -    | x    |      | x    |      | S    | x    |
| 4V7J                  | 2009 | 3.3  | P2,2,2, |      | met  | met |      |      |      | x    | -    | x    | -    | x    |      | x    |      | S    | x    |
| 4V5J                  | 2010 | 3.1  | P2,2,2, |      | phe  | phe |      |      |      | x    | -    | x    | -    | x    |      | x    |      | S    | x    |
| 4V5L                  | 2010 | 3.1  | P12,1   | trp  | phe  | phe |      |      |      | x    | -    | x    | -    | x    |      | x    |      | S    | x    |
| 4V5P                  | 2011 | 3.1  | P12,1   | trp  | NC   | phe |      |      |      | x    | -    | x    | -    | x    |      | x    |      | S    | x    |
| 4V5Q                  | 2011 | 3.1  | P12,1   | trp  | phe  | phe |      |      |      | x    | -    | x    | -    | x    |      | x    |      | S    | x    |
| 4V5S                  | 2011 | 3.1  | P12,1   | Trp  | phe  | phe |      |      |      | x    | -    | x    | -    | x    |      | x    |      | S    | x    |
| 4V5R                  | 2011 | 3.1  | P12,1   | trp  | phe  | phe |      |      |      | x    | -    | x    | -    | x    |      | x    |      | S    | x    |
| 4V8Q                  | 2012 | 3.1  | P12,1   | tm   | met  | met |      |      |      | x    | -    | x    | -    | x    |      | x    |      | S    | x    |
| 4V8N                  | 2013 | 3.1  | P2,2,2, | ile  | ile  | ile |      |      |      | x    | -    | x    | -    | x    |      | x    |      | S    | x    |
| 4V9H                  | 2013 | 2.86 | P12,1   |      | P/E  | hyb |      |      |      | x    | -    | x    | -    | x    |      | x    |      | S    | x    |
| 4V9I                  | 2013 | 3.3  | P2,2,2, | ser  | ser  | ser |      |      |      | x    | -    | x    | -    | x    |      | x    |      | S    | x    |
| 4V63                  | 2008 | 3.2  | P2,2,2, |      | met  | met |      |      |      |      | x    | -    | x    |      | x    |      |      | x    | x    |
| 4V67                  | 2008 | 3.   | P2,2,2, |      | met  | met |      |      |      |      | x    | -    | x    |      | x    |      |      | x    | x    |
| 4V83                  | 2011 | 3.5  | P2,2,2, |      | IRES |     |      |      |      |      | x    | -    | x    |      | x    |      |      | x    | x    |





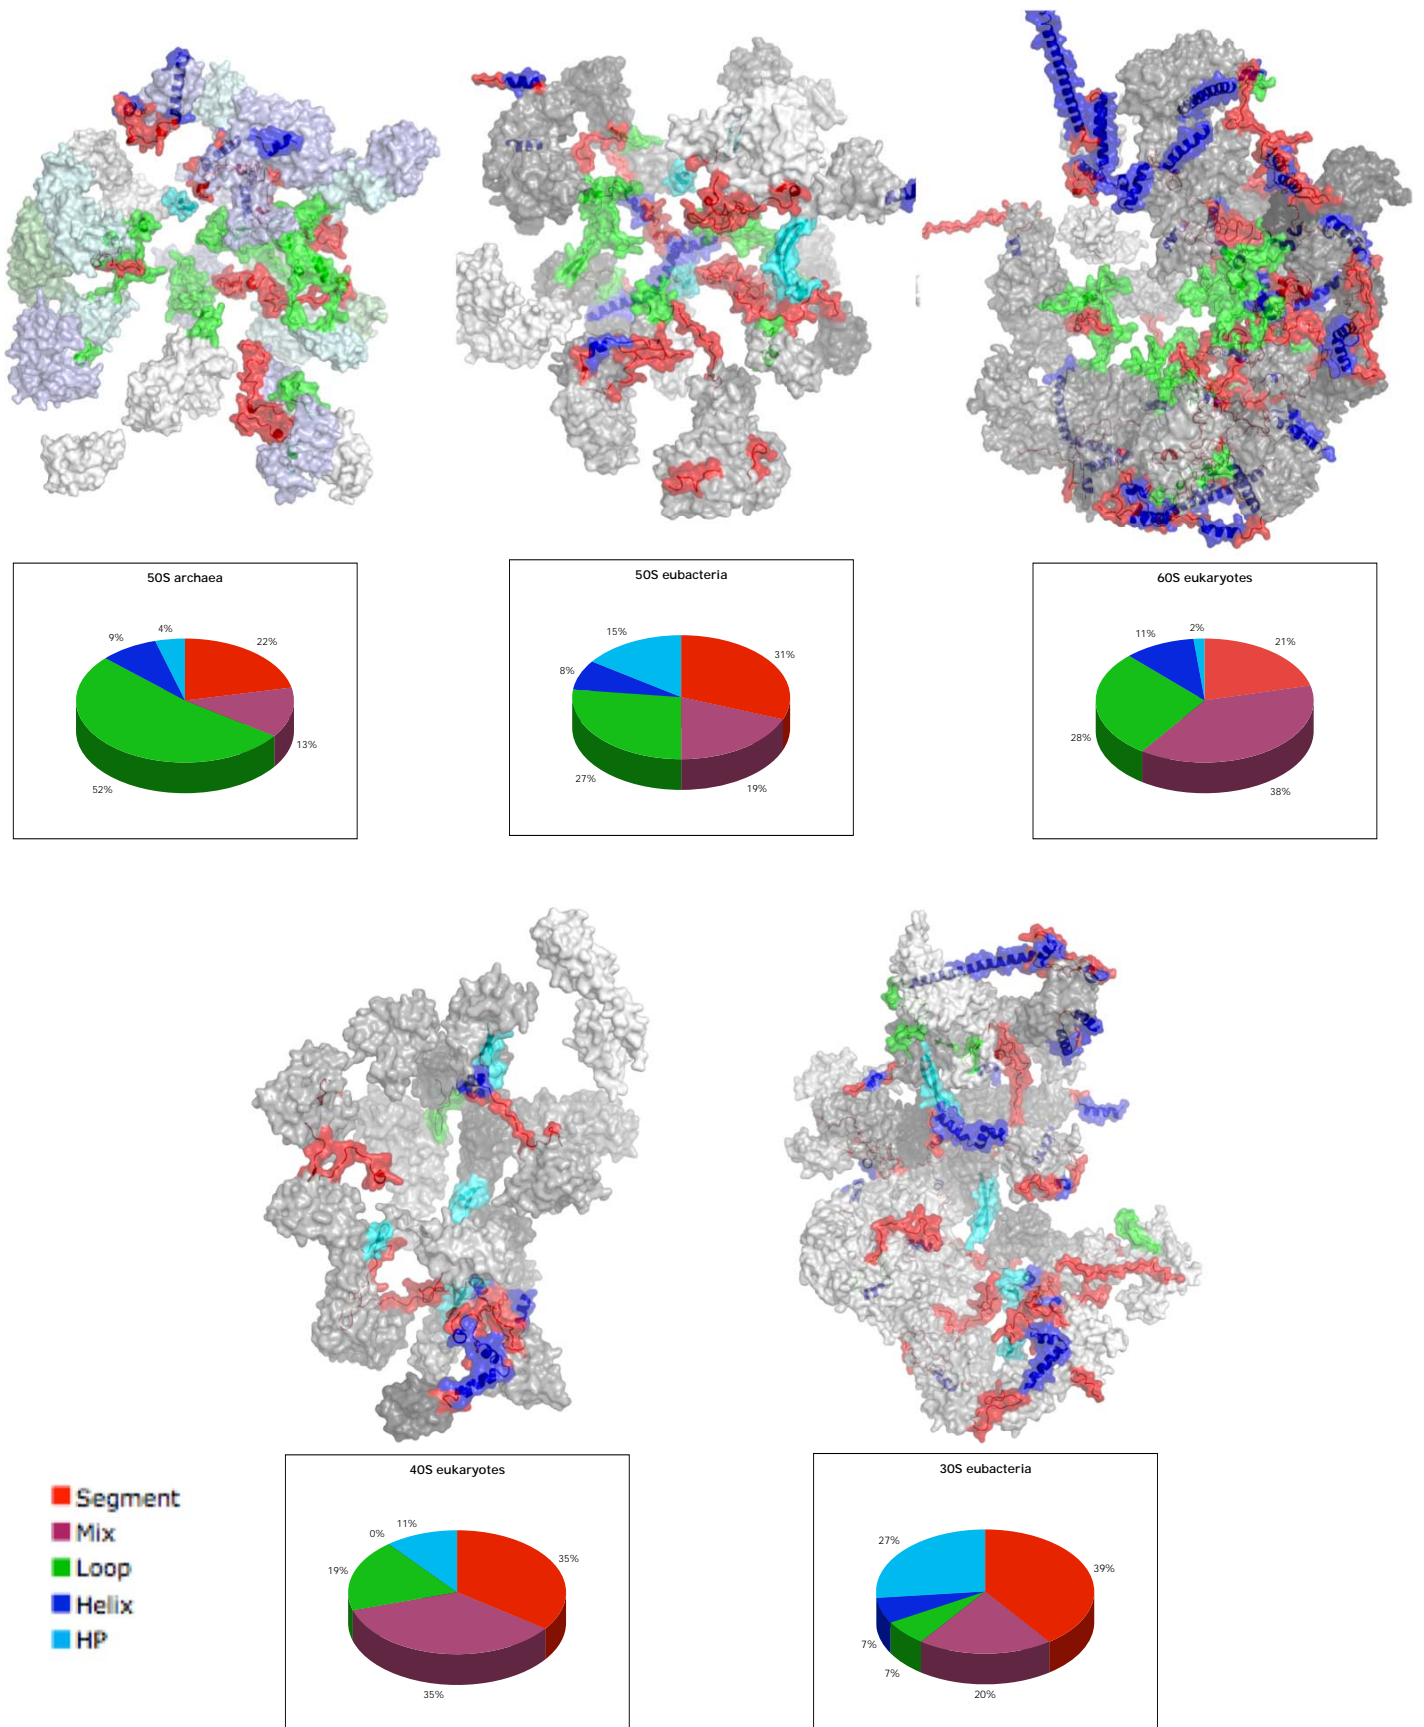

**Figure S1**

Statistic of the types of extensions of the archaeal (pdb\_id: 1s72), eubacterial (pdb\_id: 4v8i) and eukaryotic (pdb\_id: 4v88) ribosomes

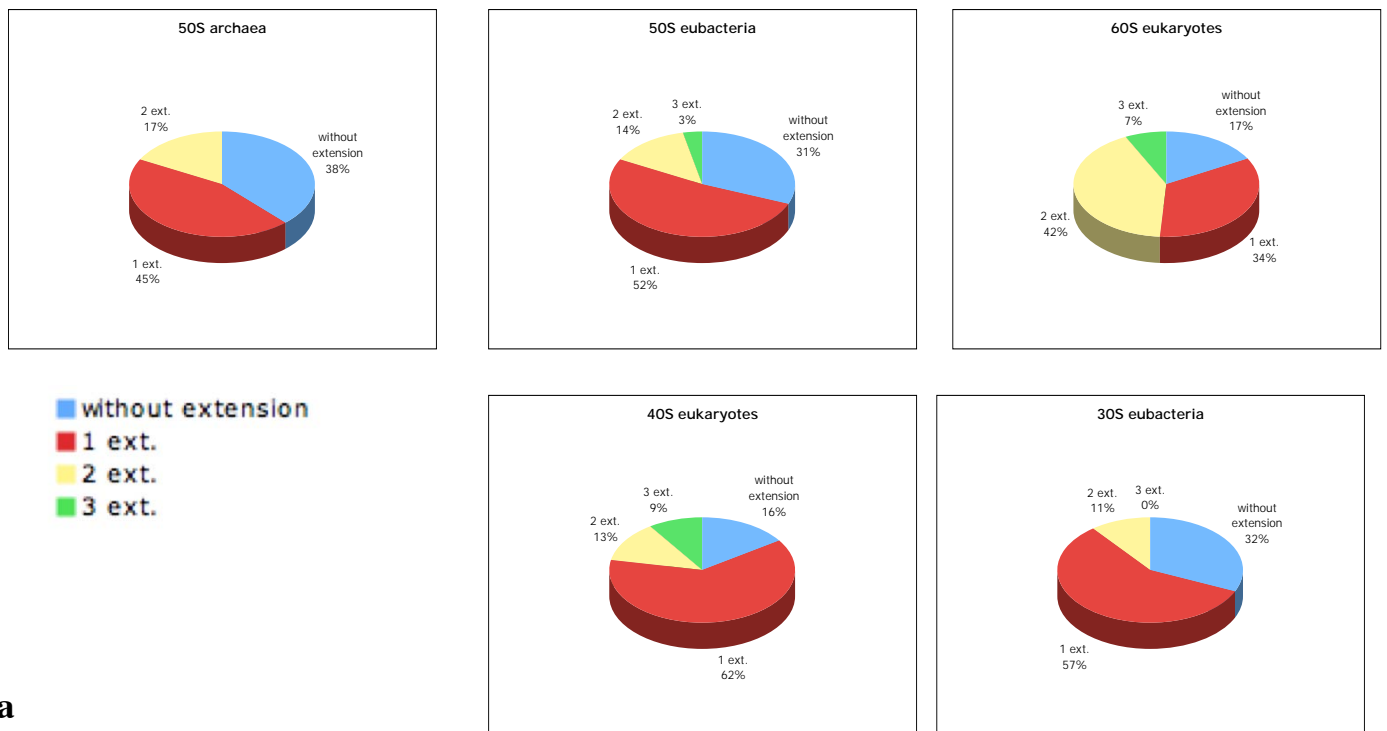

**a**

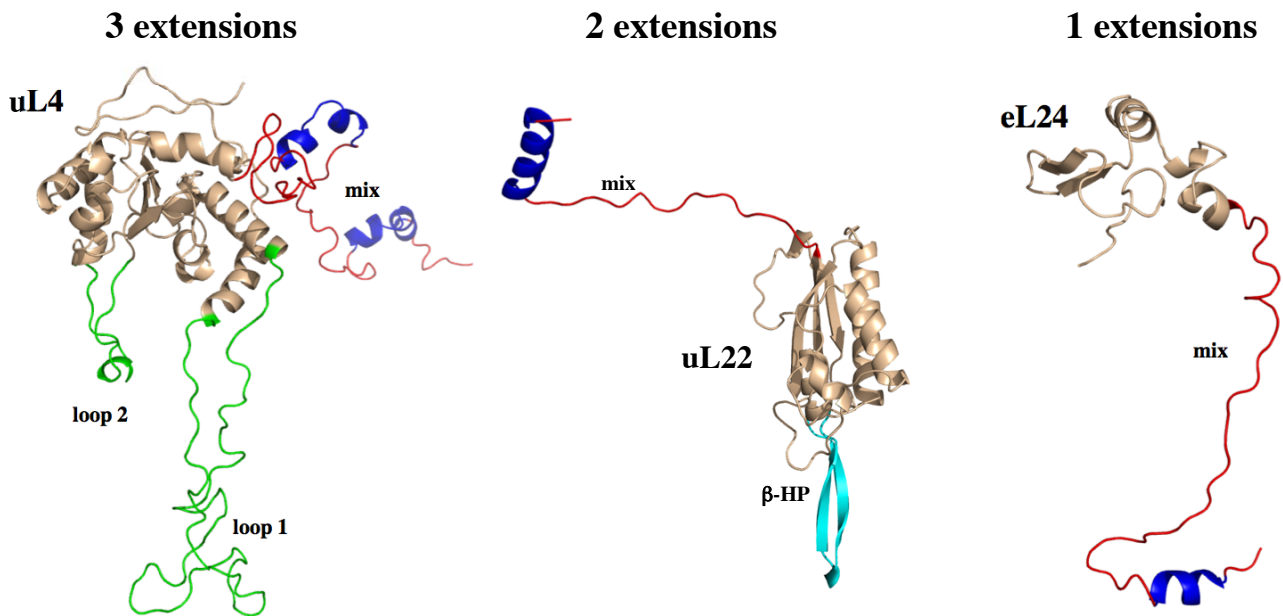

**b**

**Figure S2**

a. Statistic of number of extensions per protein within the archaeal (pdb\_id: 1s72), eubacterial (pdb\_id: 4v8i) and eukaryotic (pdb\_id: 4v88) ribosomes  
 b. Examples of proteins with multiple extensions

### Eubacteria 50S

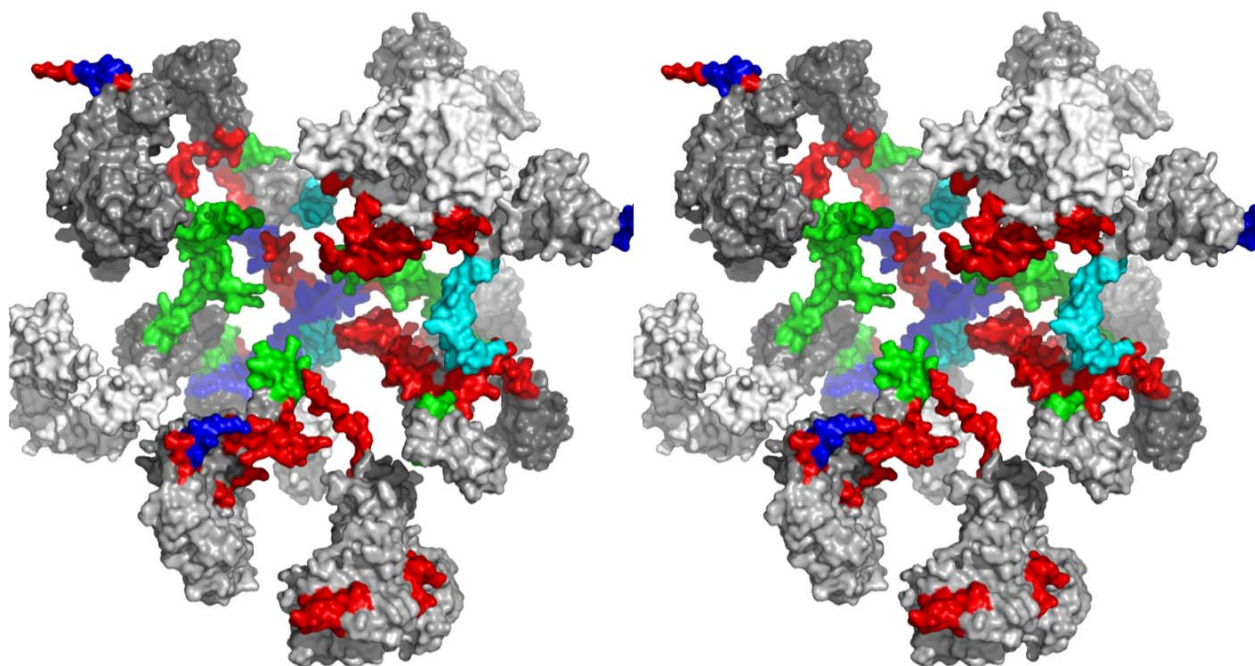

### Eukarya 60S

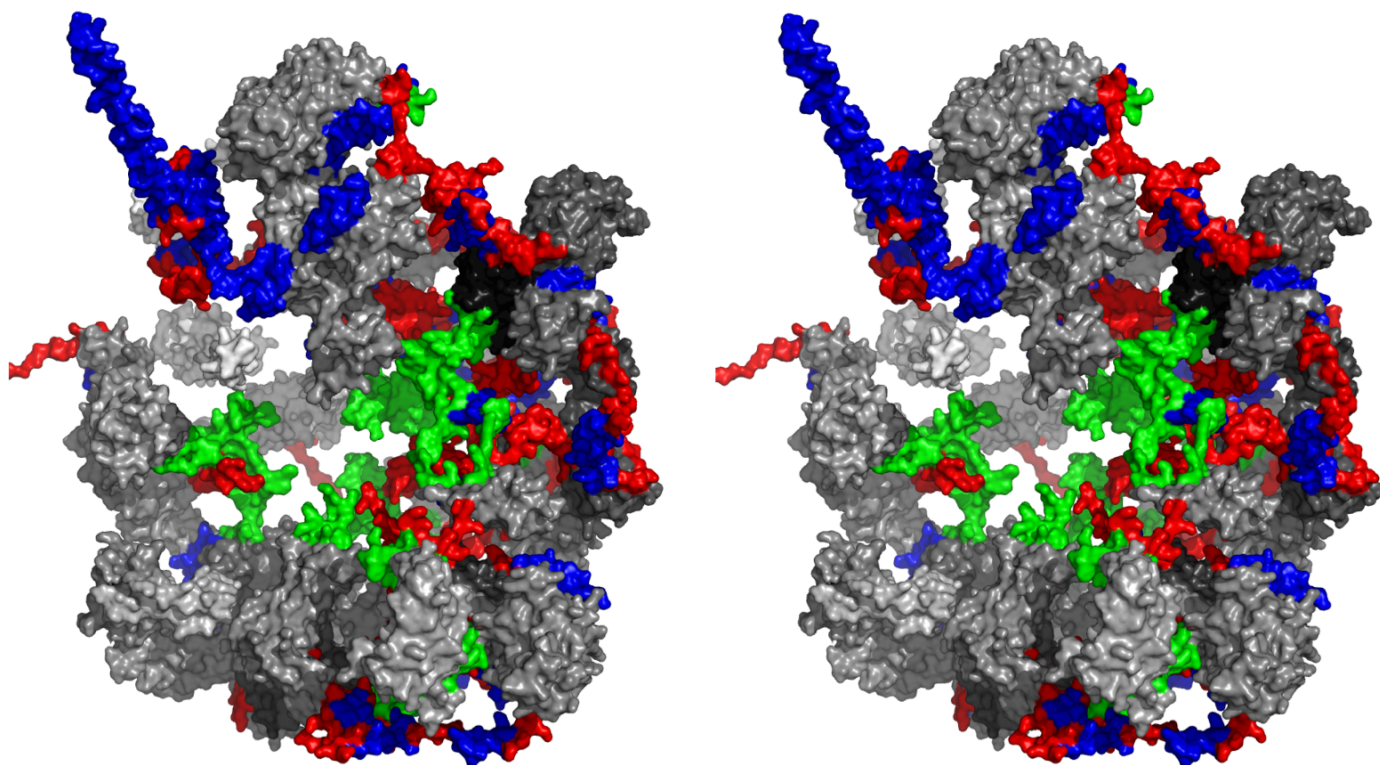

**Figure S3 a: stereo views of the large subunits**

(up) eubacteria (pdb\_id: 4v8i)

(down) eukarya (pdb\_id: 4v88)

Extensions are coloured according to their secondary structures  
Green: loops, Red: segments, Blue:  $\alpha$ -helices, Cyan:  $\beta$ -hairpins

### Eubacteria 30S

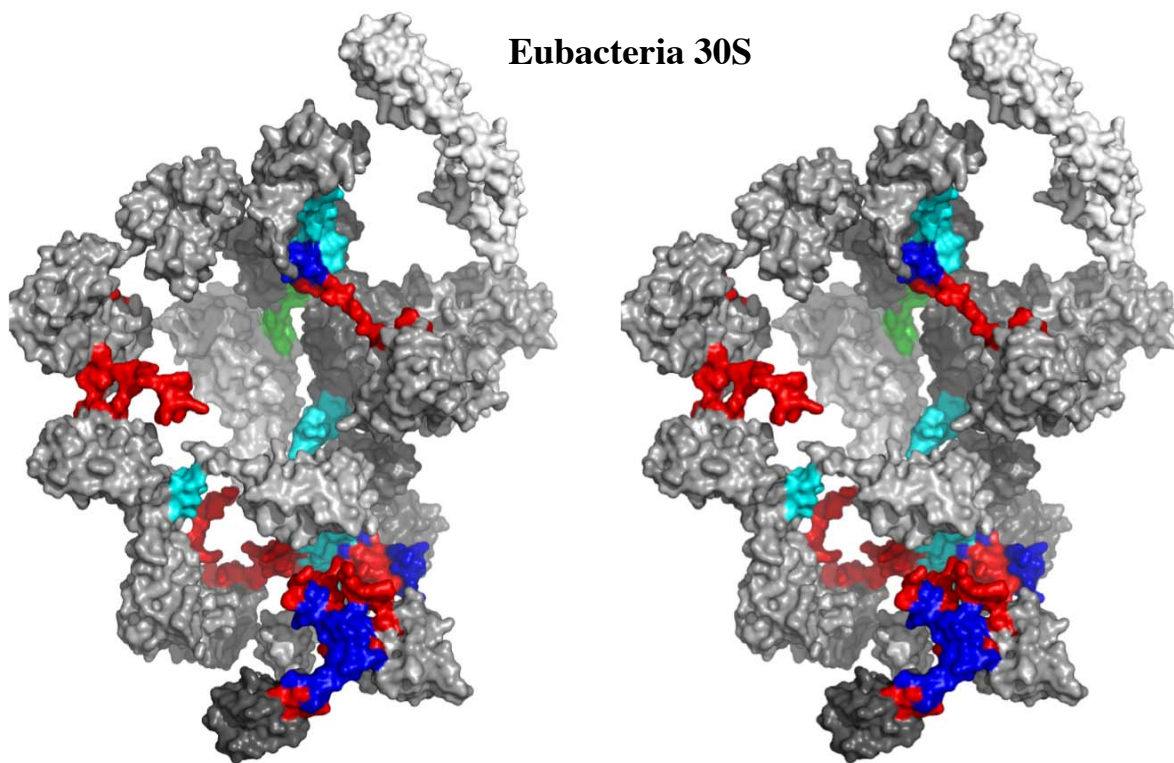

### Eukarya 40S

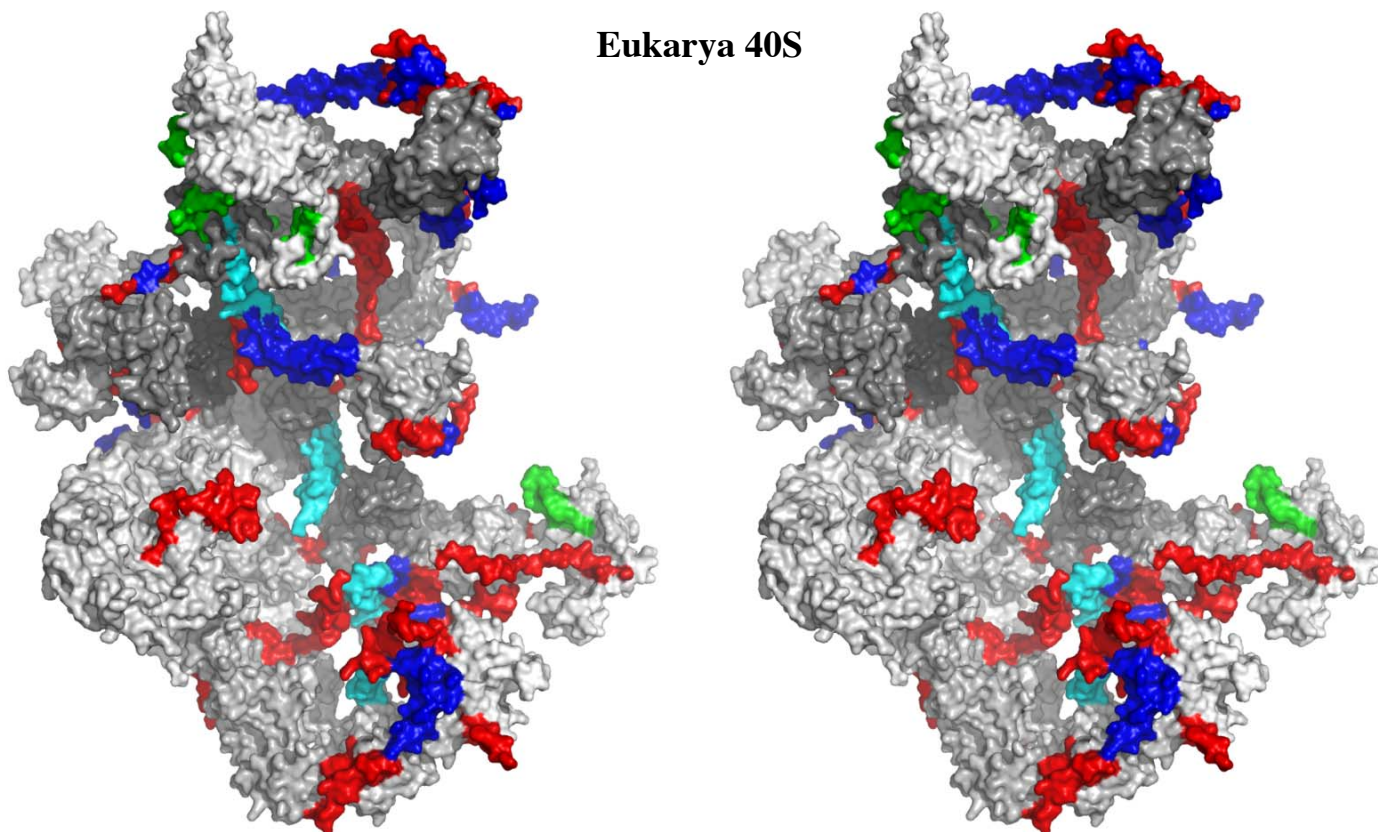

**Figure S3 b: stereo views of the small subunits**

(up) eubacteria (pdb\_id: 4v8i); (down) eukaryotic ribosomes (pdb\_id: 4v88)

Extensions are coloured according to their secondary structures

Green: loops, Red: segments, Blue:  $\alpha$ -helices, Cyan:  $\beta$ -hairpins

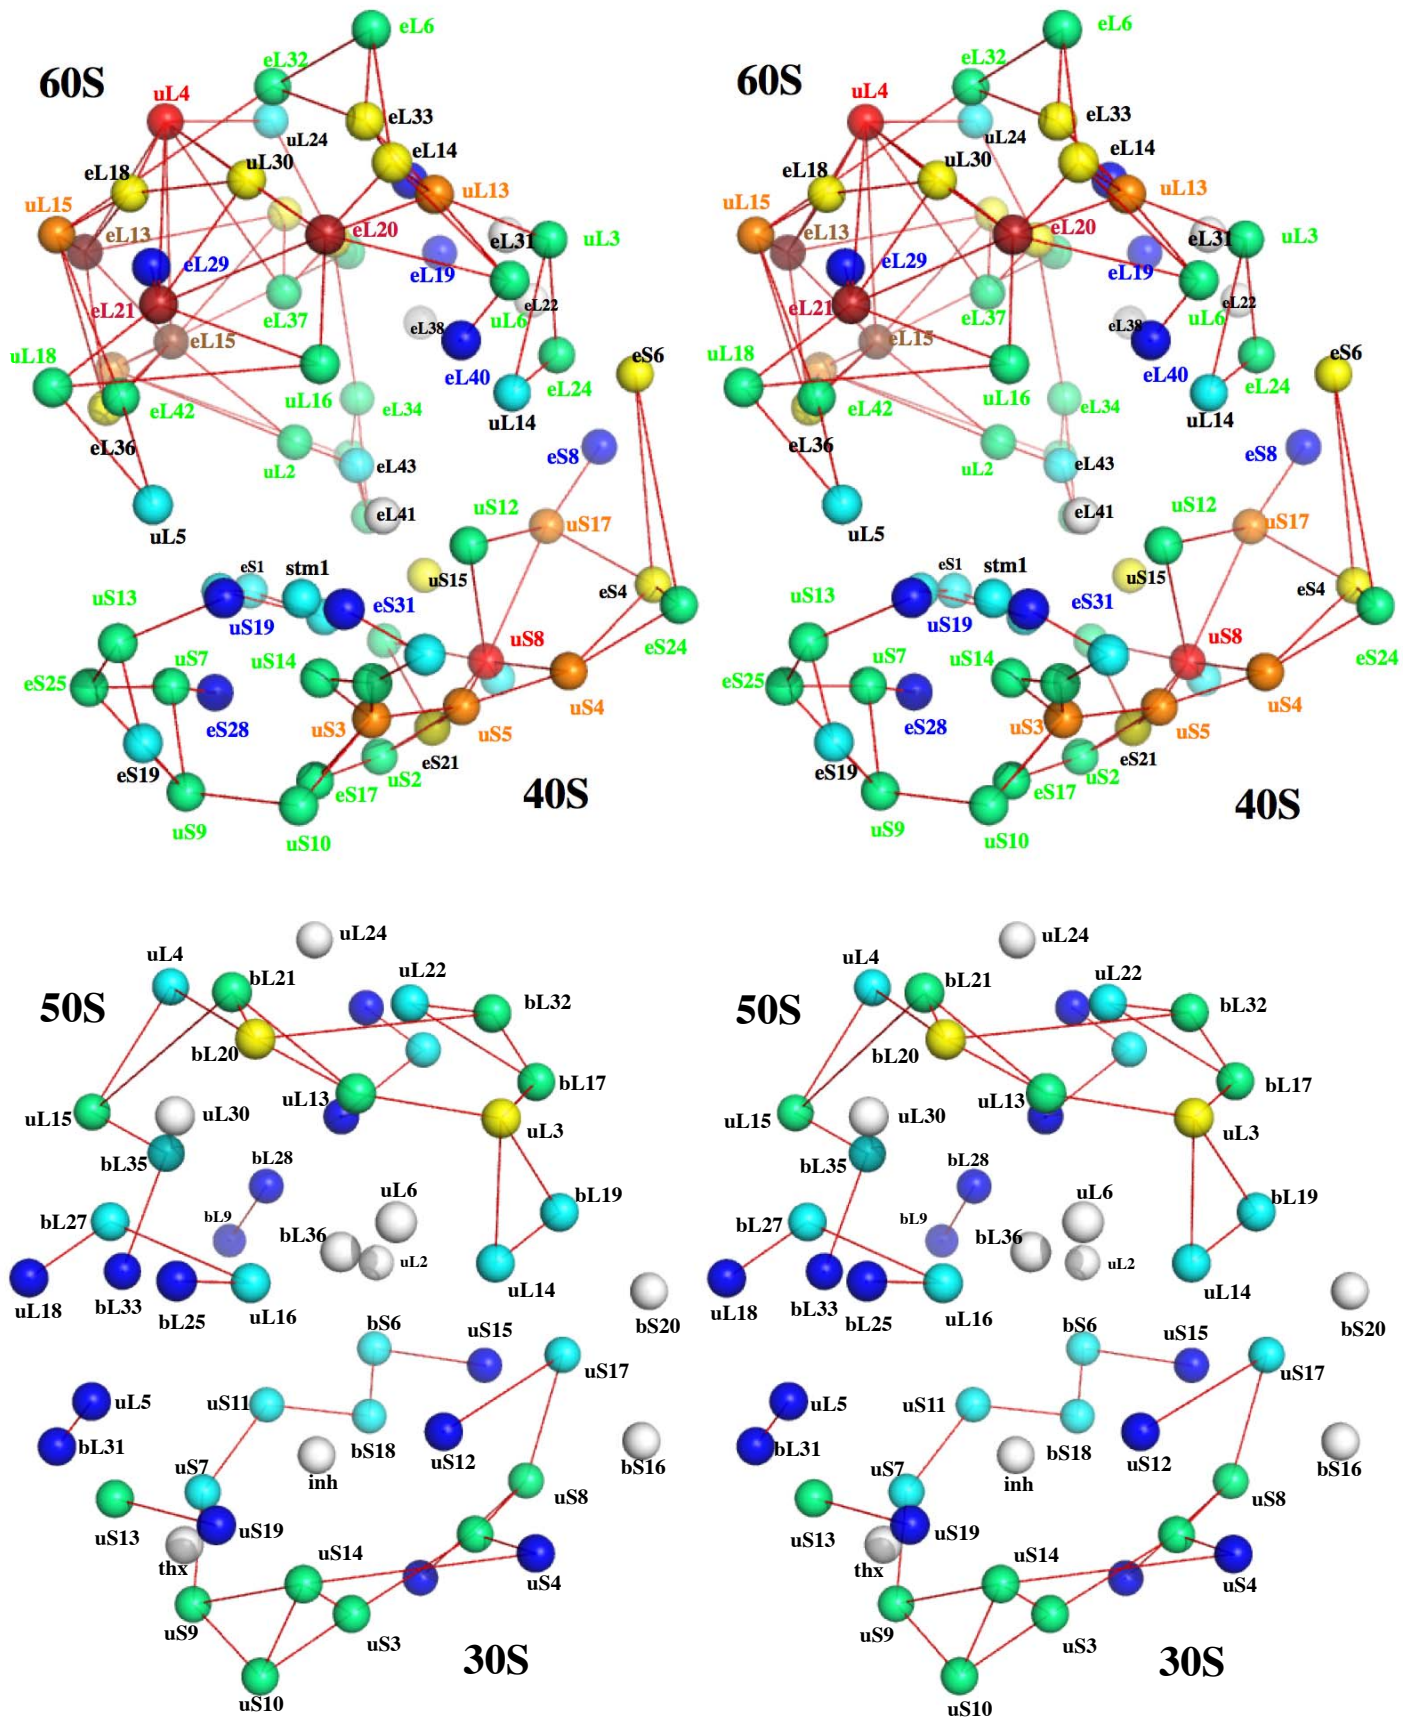

**Figure S4: stereo views of the ribosomal protein interaction networks**

(up) eukarya (pdb\_id: 4v88) (down) eubacteria (pdb\_id: 4v8i). The coloured spheres correspond to the centre of mass of the ribosomal proteins. Red lines indicate their connection within the ribosome structures. The proteins are coloured in function of their number of interacting partners following the same colour codes as in Figure 2 (main text).

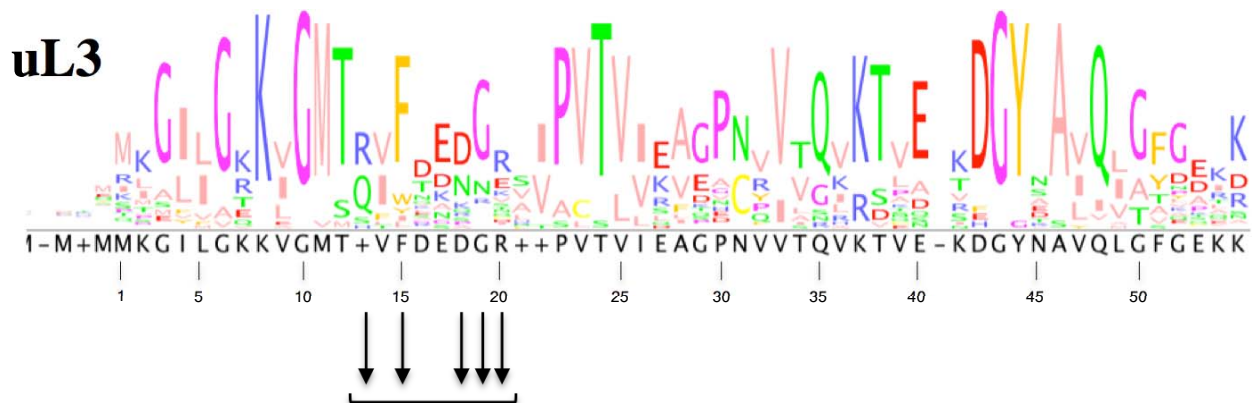

**uL14**

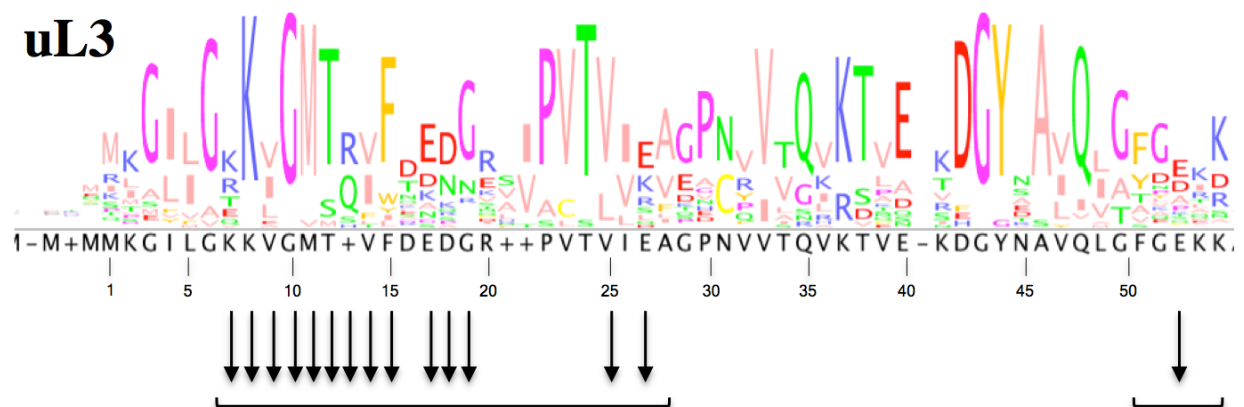

**bL19**

**bL19**

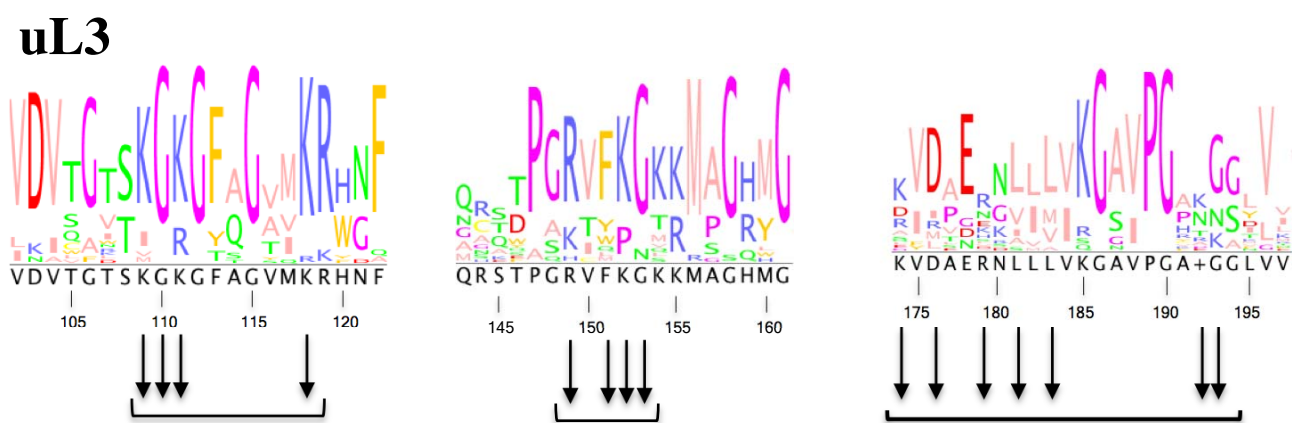

**bL17**

**uL13**

**bL19**

Figure S5: amino acids conservation at the protein interfaces

### uL4

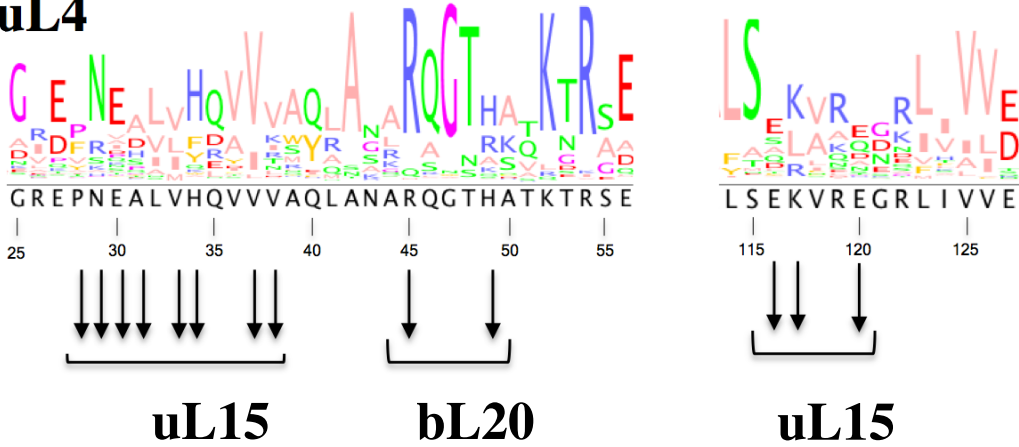

### bL9

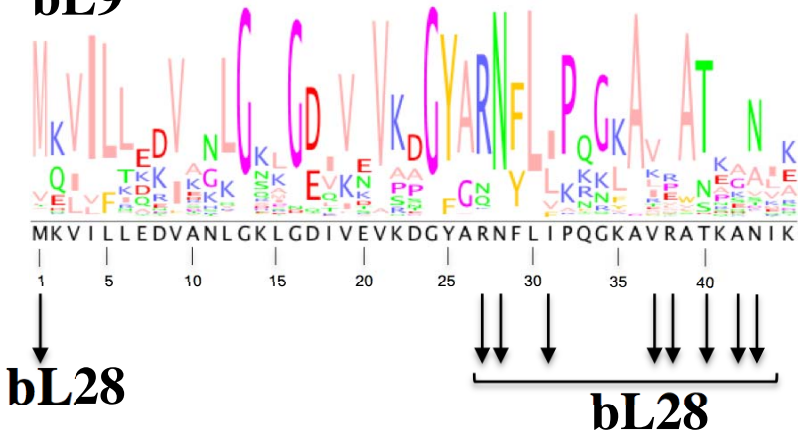

### uL13

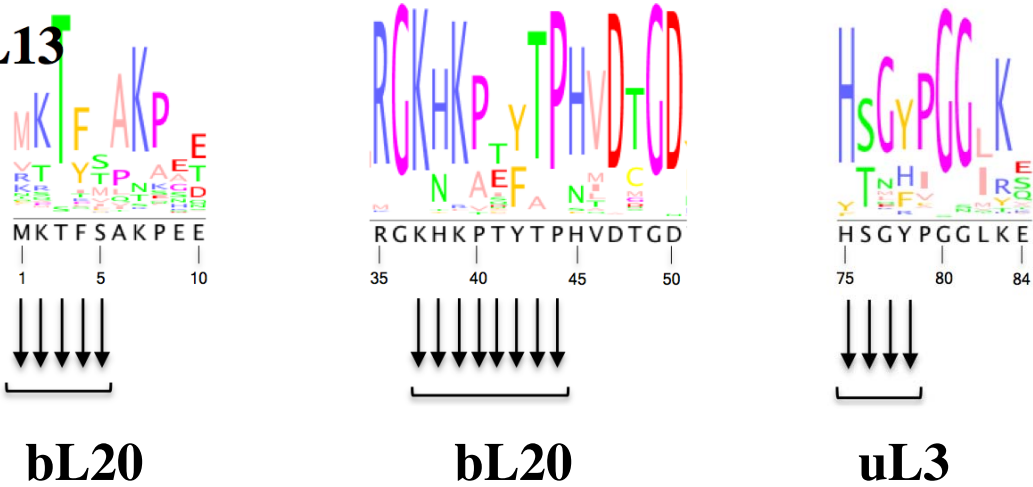

Figure S5 (continued)



## uL14

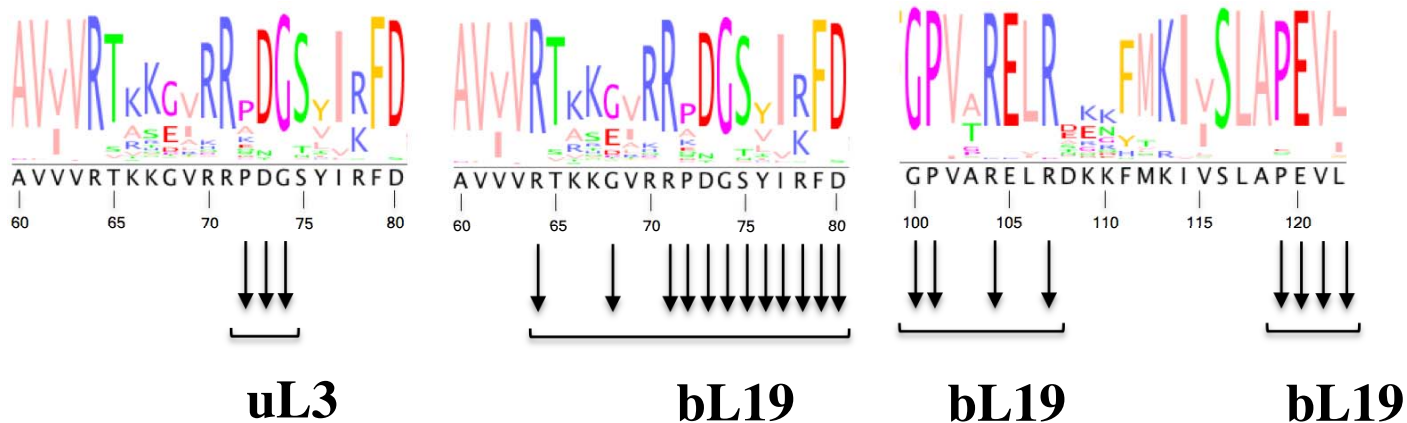

## uL15

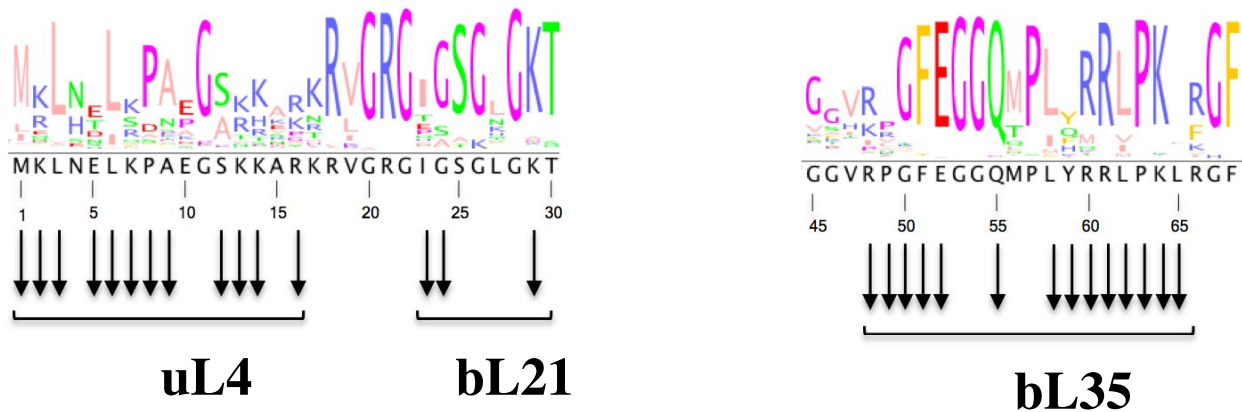

## bL17

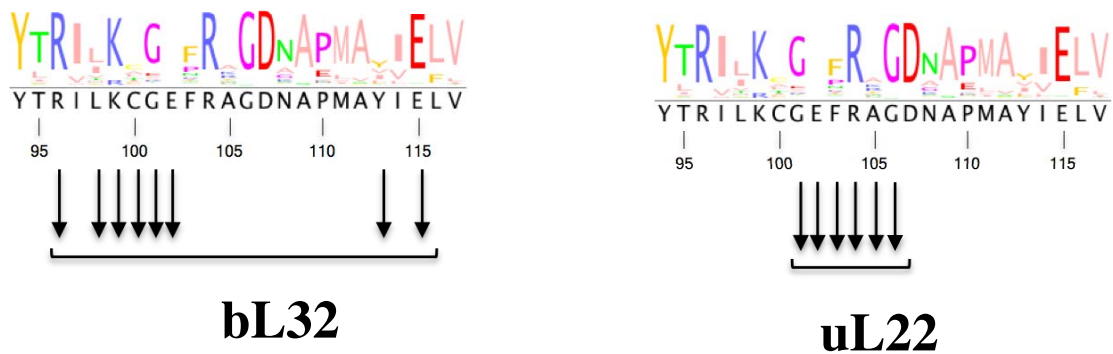

Figure S5 (continued)

## uL16

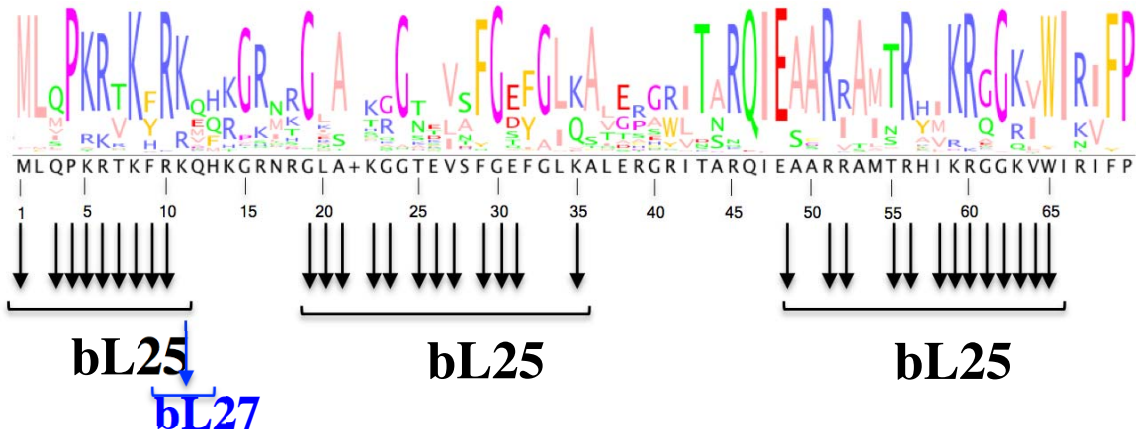

## uL16

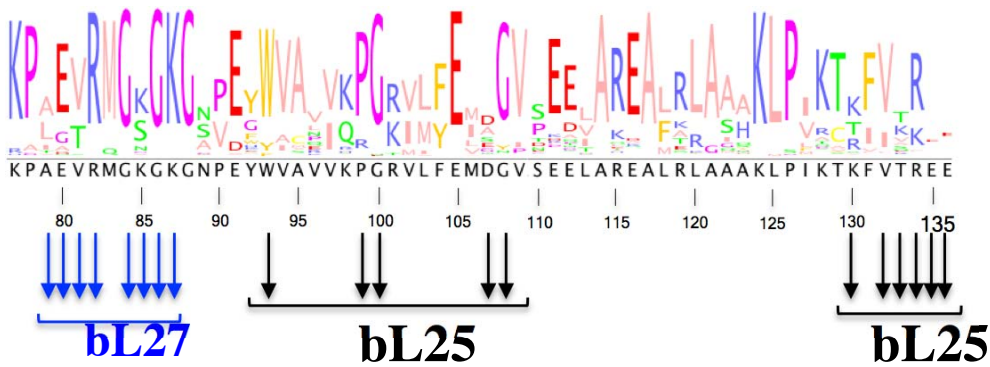

## bL19

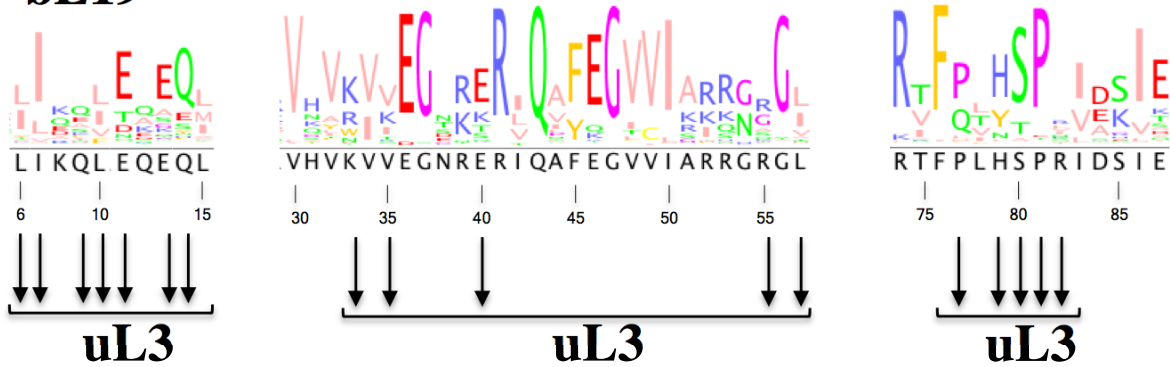

## bL19

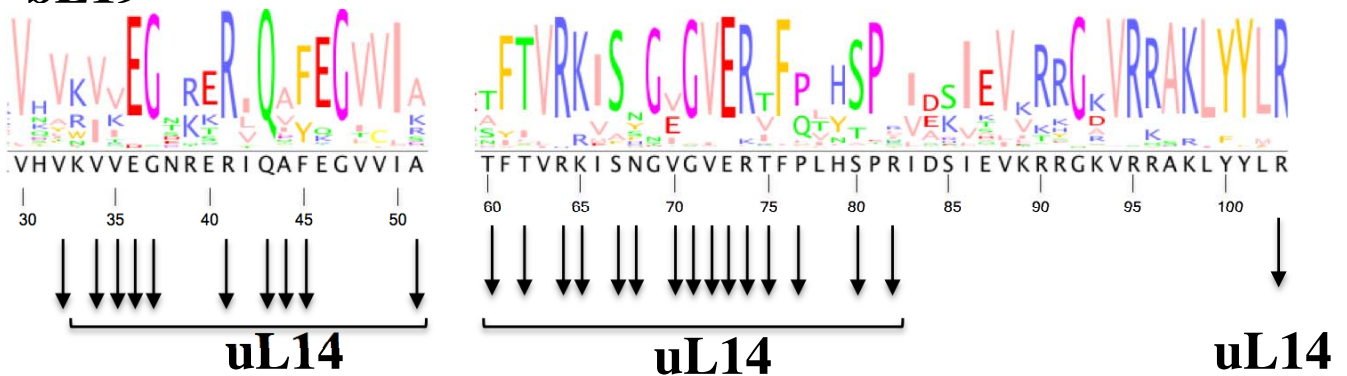

Figure S5 (continued)

### bL20

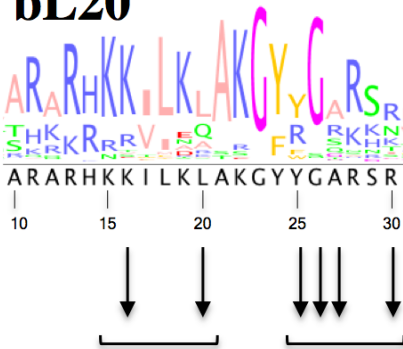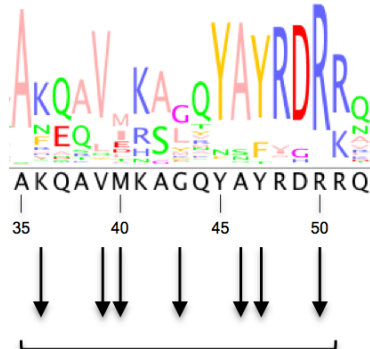

### bL21

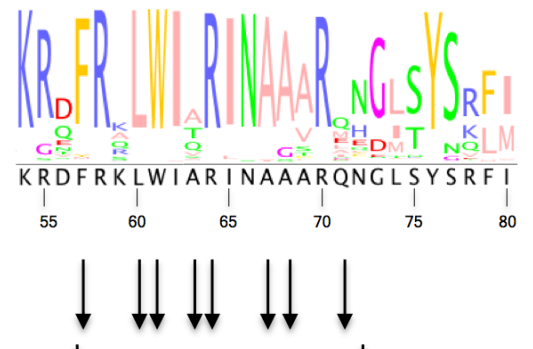

### uL13

### bL20

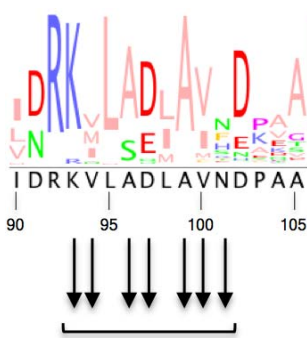

### uL13

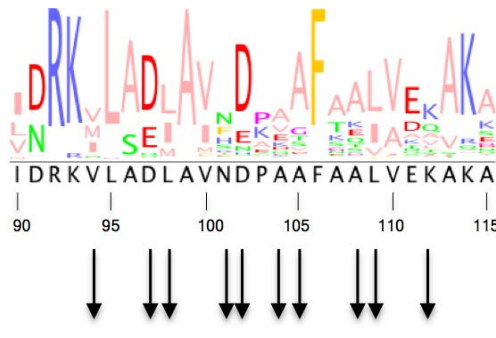

### bL21

### bL21

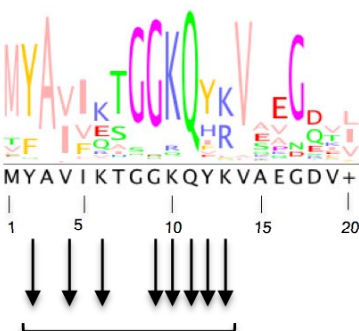

### bL20

### uL13

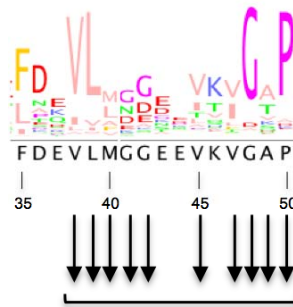

### bL20

Figure S5 (continued)

## bL21

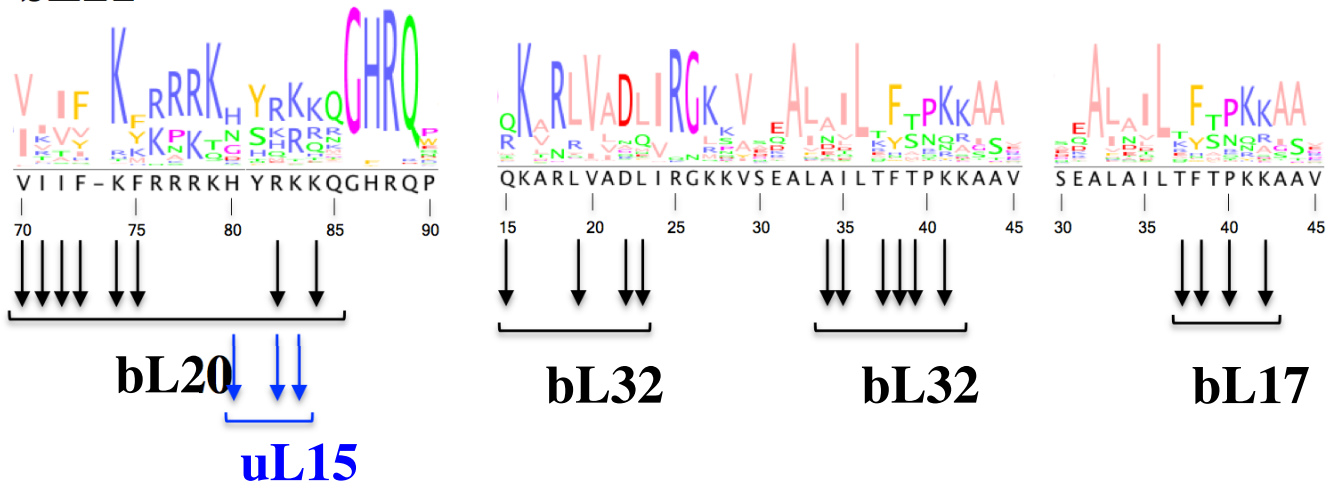

## uL23

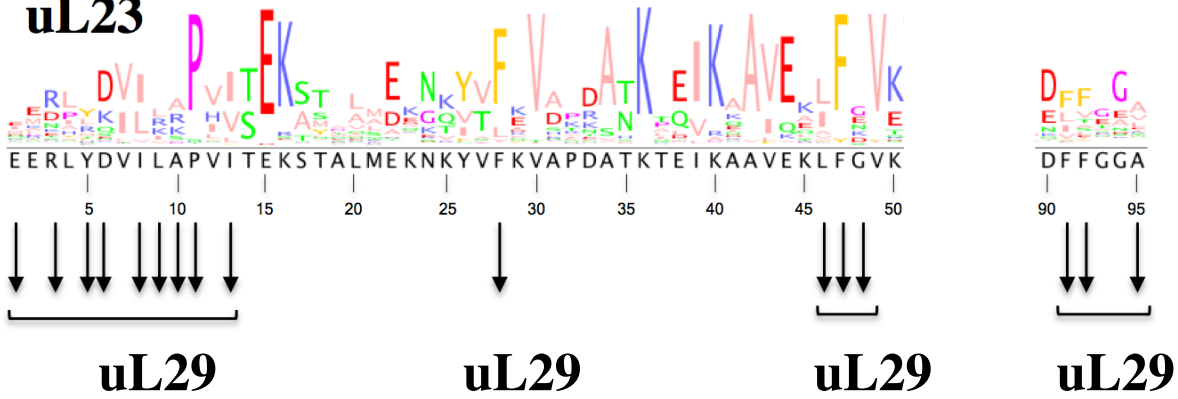

## bL27

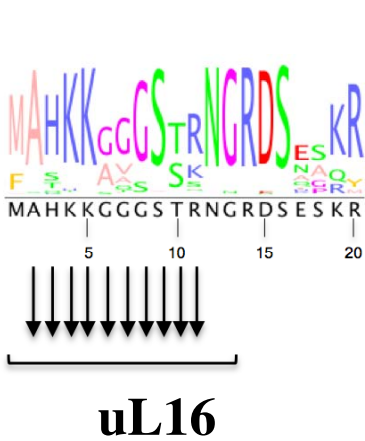

## uL29

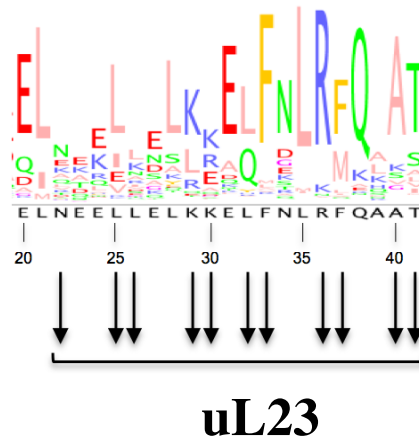

## bL32

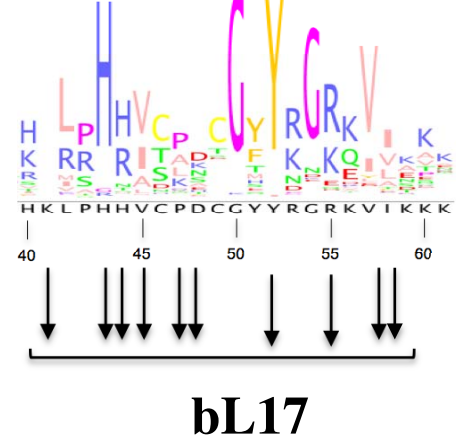

Figure S5 (continued)

### bL32

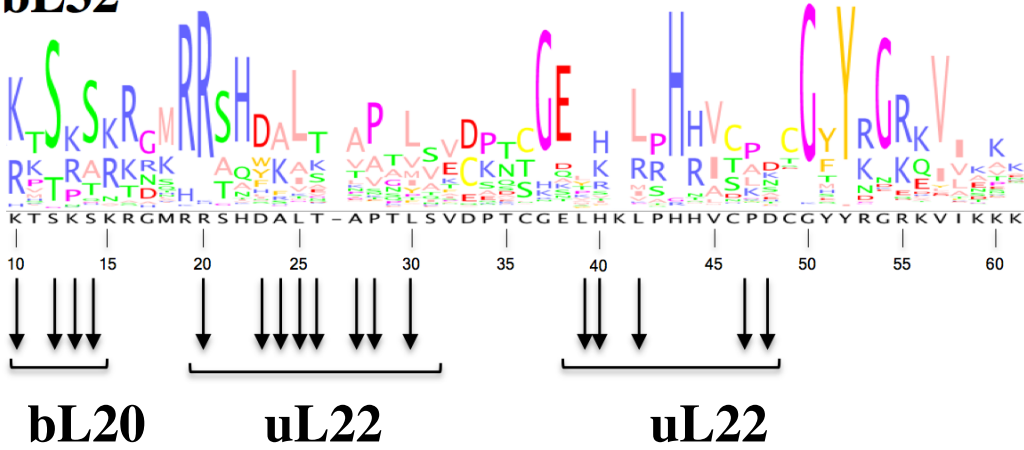

### bL33

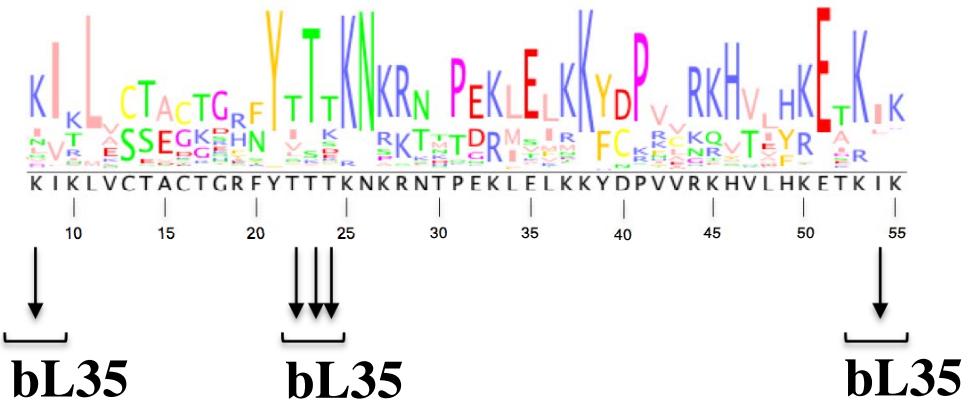

### bL35

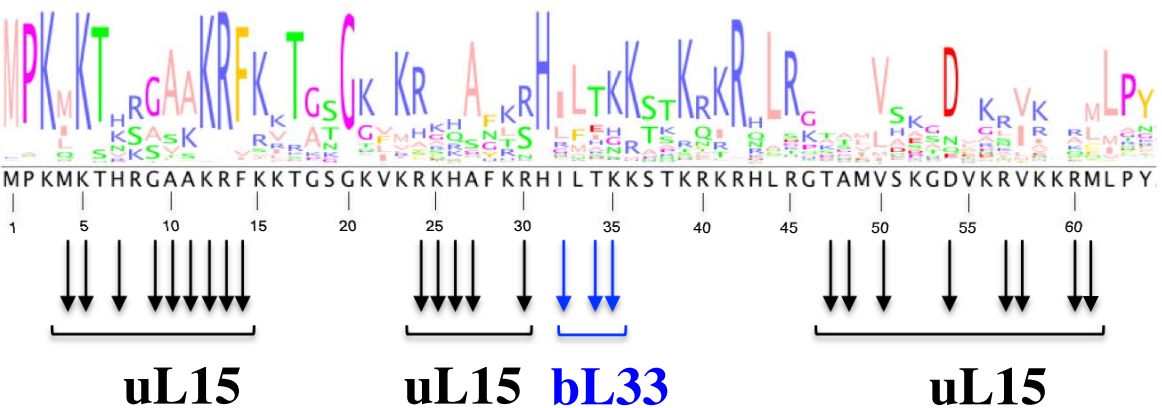

**Figure S5: sequence conservation in the protein contact regions of ribosomal proteins of the 50S eubacterial subunit.** The logo of the consensus sequences have been generated with *jalview* using the aligned eubacterial ribosomal protein sequences provided by U. Wolf and N. Yutin (see reference 15 and Supplementary Table S12). The arrows indicate the residues in contact with another protein.

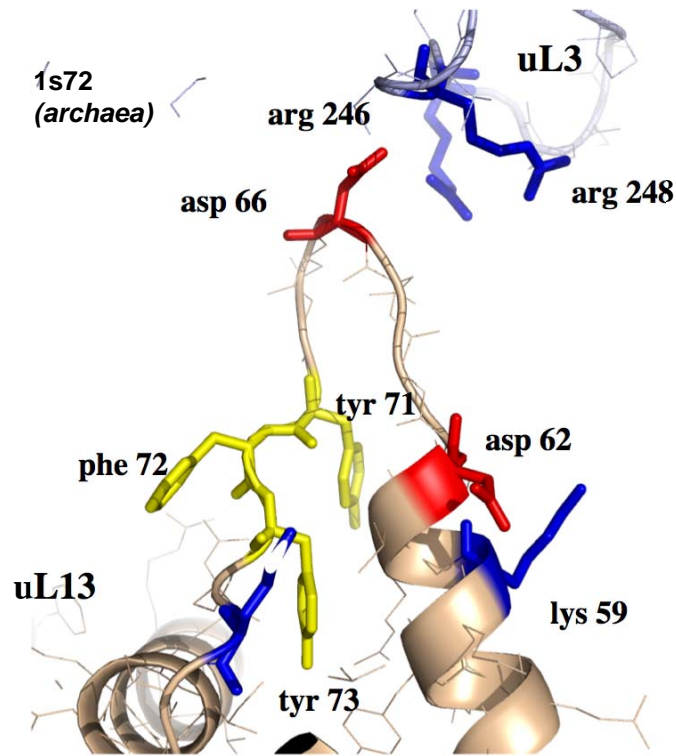

a

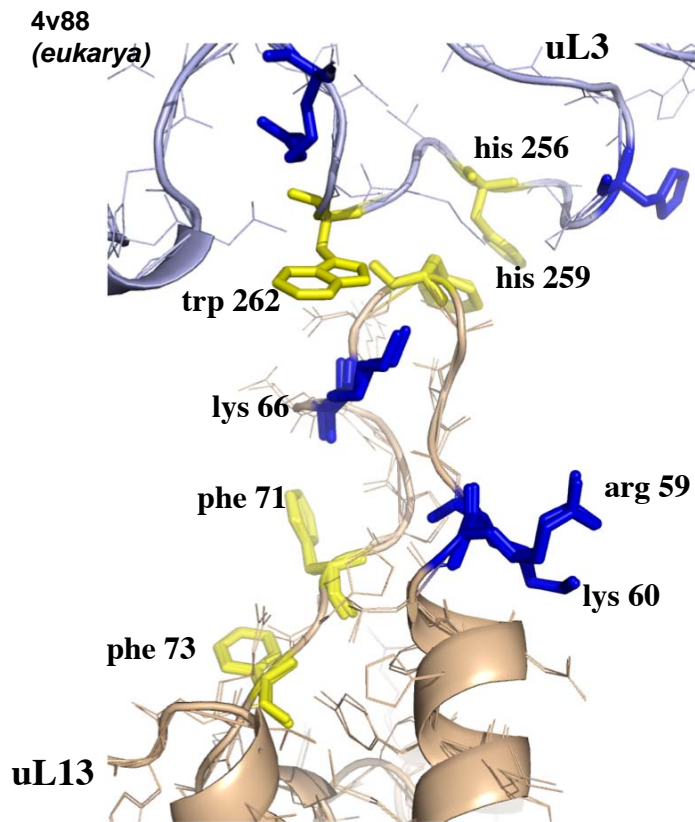

b

**Figure S6: universal uL13-uL3 interaction**

a: archaea (in which the cation- $\pi$  interaction is replaced by a ionic one) and b: eukarya. Equivalent key residues are represented by coloured sticks.

**Eubacteria**  
(4v8i)

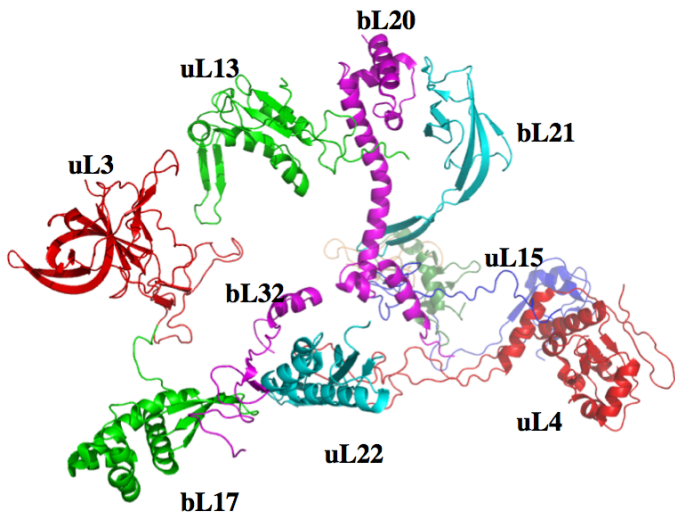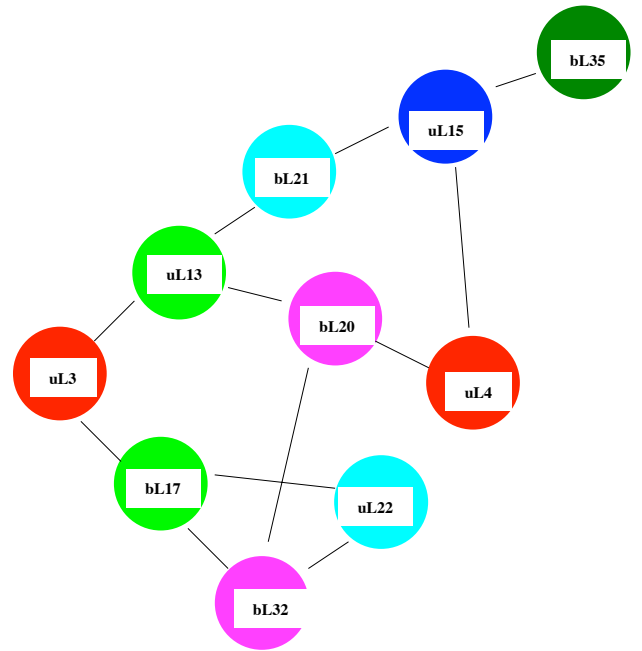

**Eukarya**  
(4v88)

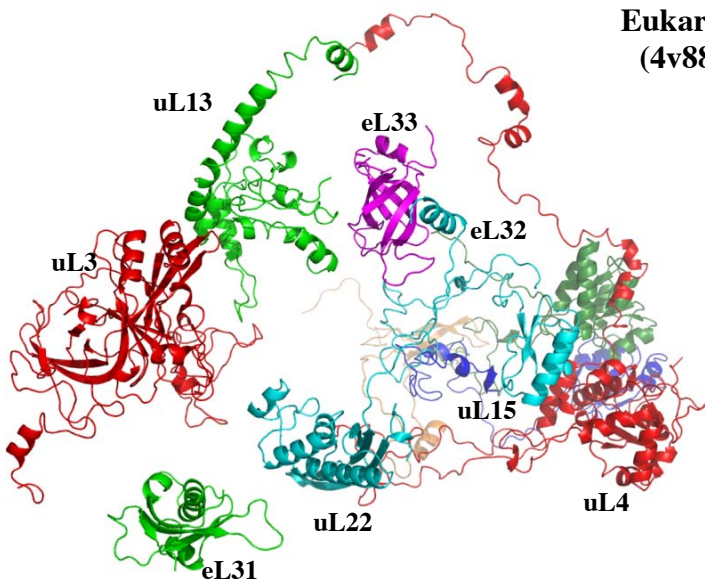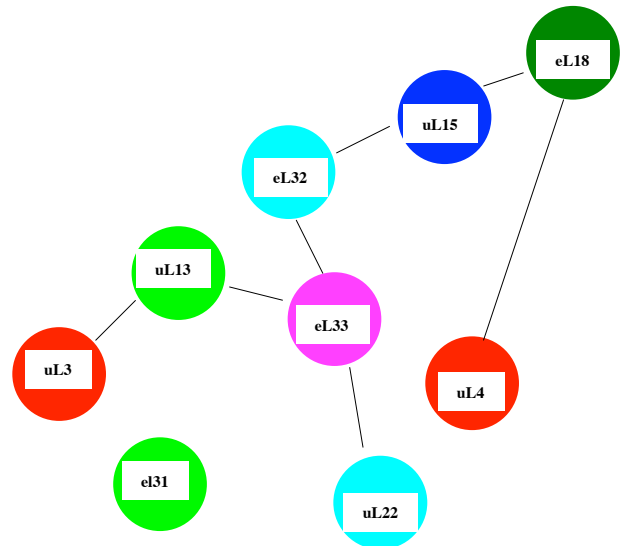

**Figure S7: homologies and analogies in protein circuits**  
(up) 50S (pdb\_id: 4v8i); (down) 60S (pdb\_id: 4v88).  
Equivalent protein are represented with the same colour.

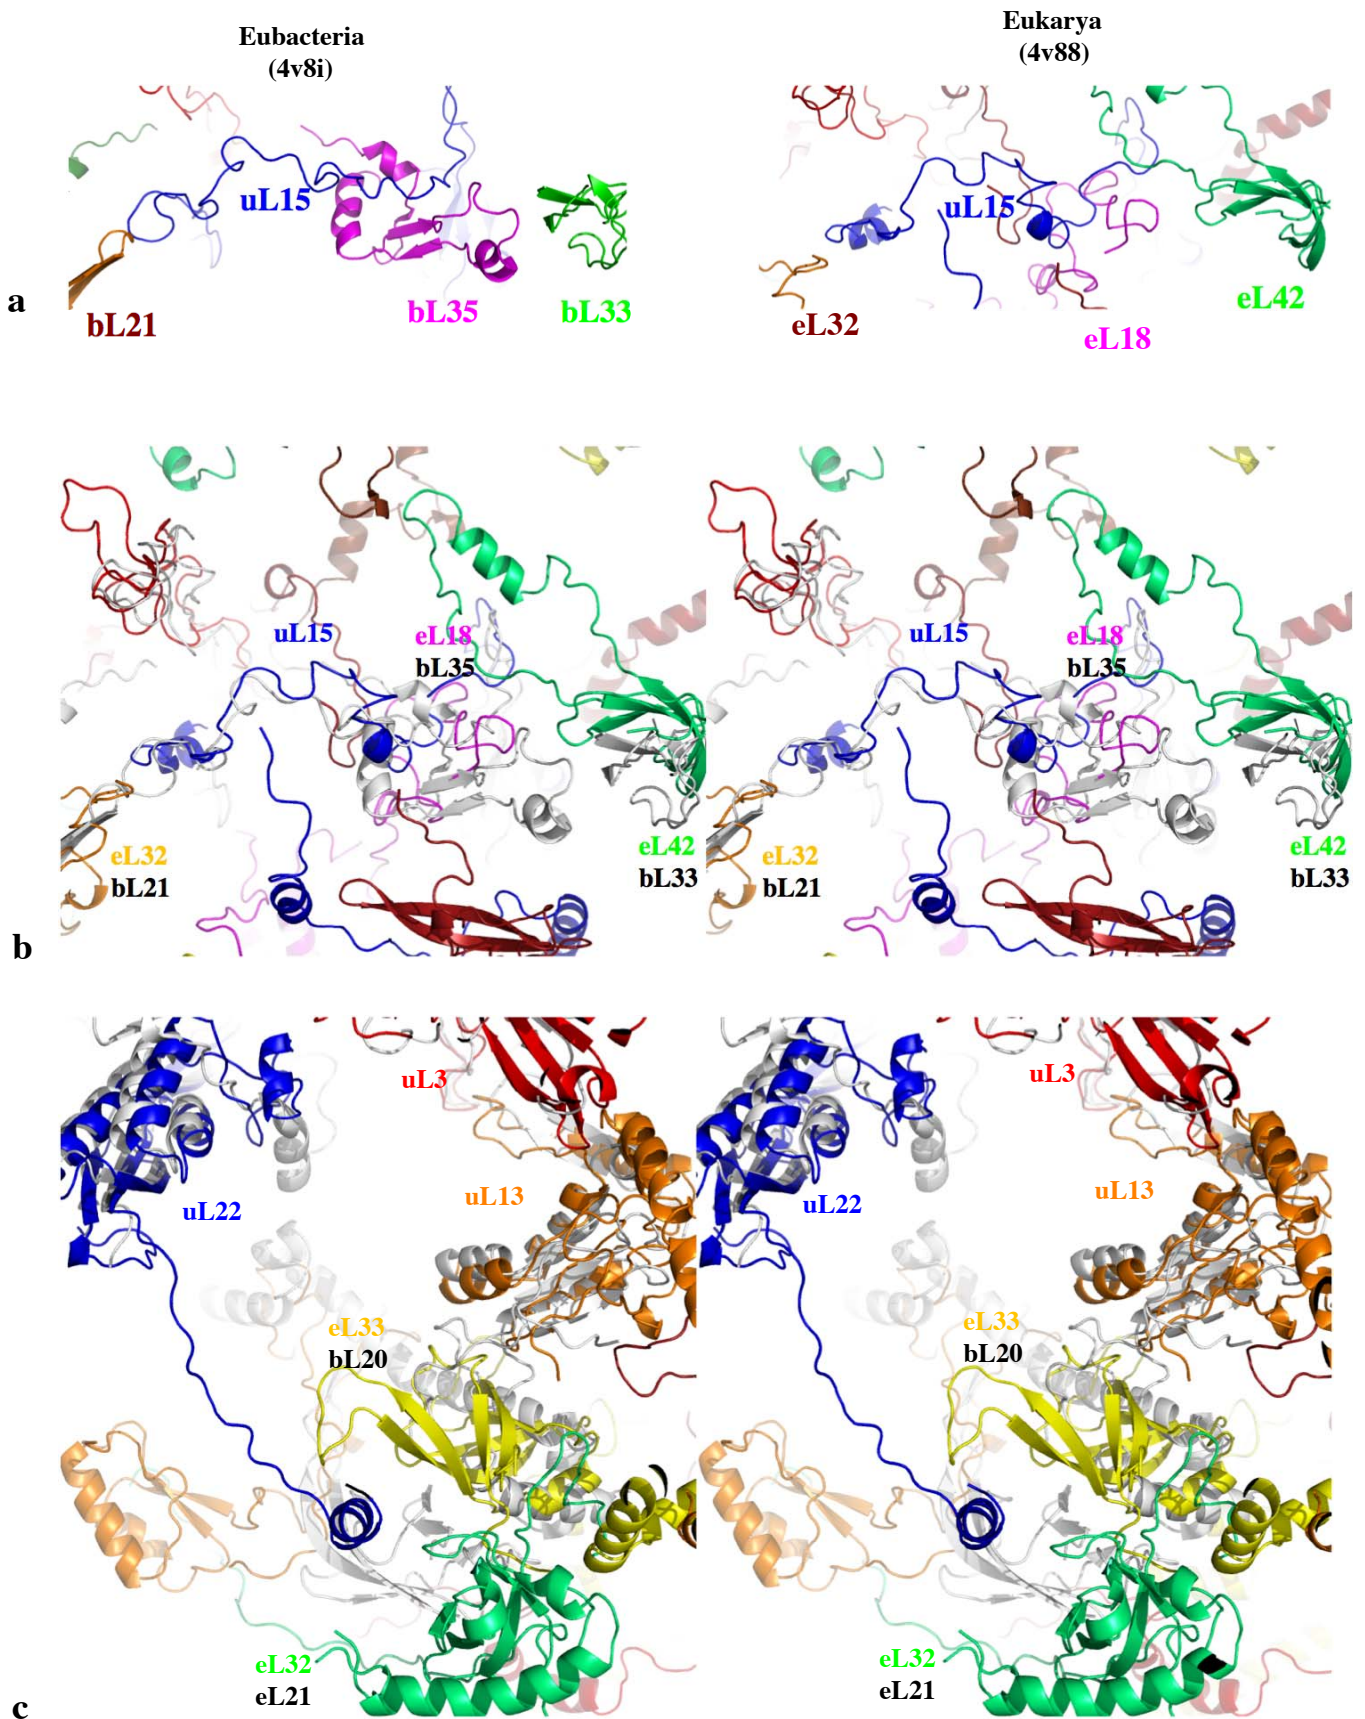

**Figure S8: equivalent and alternative pathways in networks of the 50S and 60S subunits**

a: Eubacterial (pdb\_id: 4v8i) and eukaryotic (pdb\_id: 4v88) circuits connecting the E-site

b: Stereo views of the superimposition of the equivalent proteins around the E-sites

c: Stereo views of the superimposition of the equivalent proteins around the exit tunnel

The bacterial proteins are represented in grey and the eukaryotic protein are coloured.



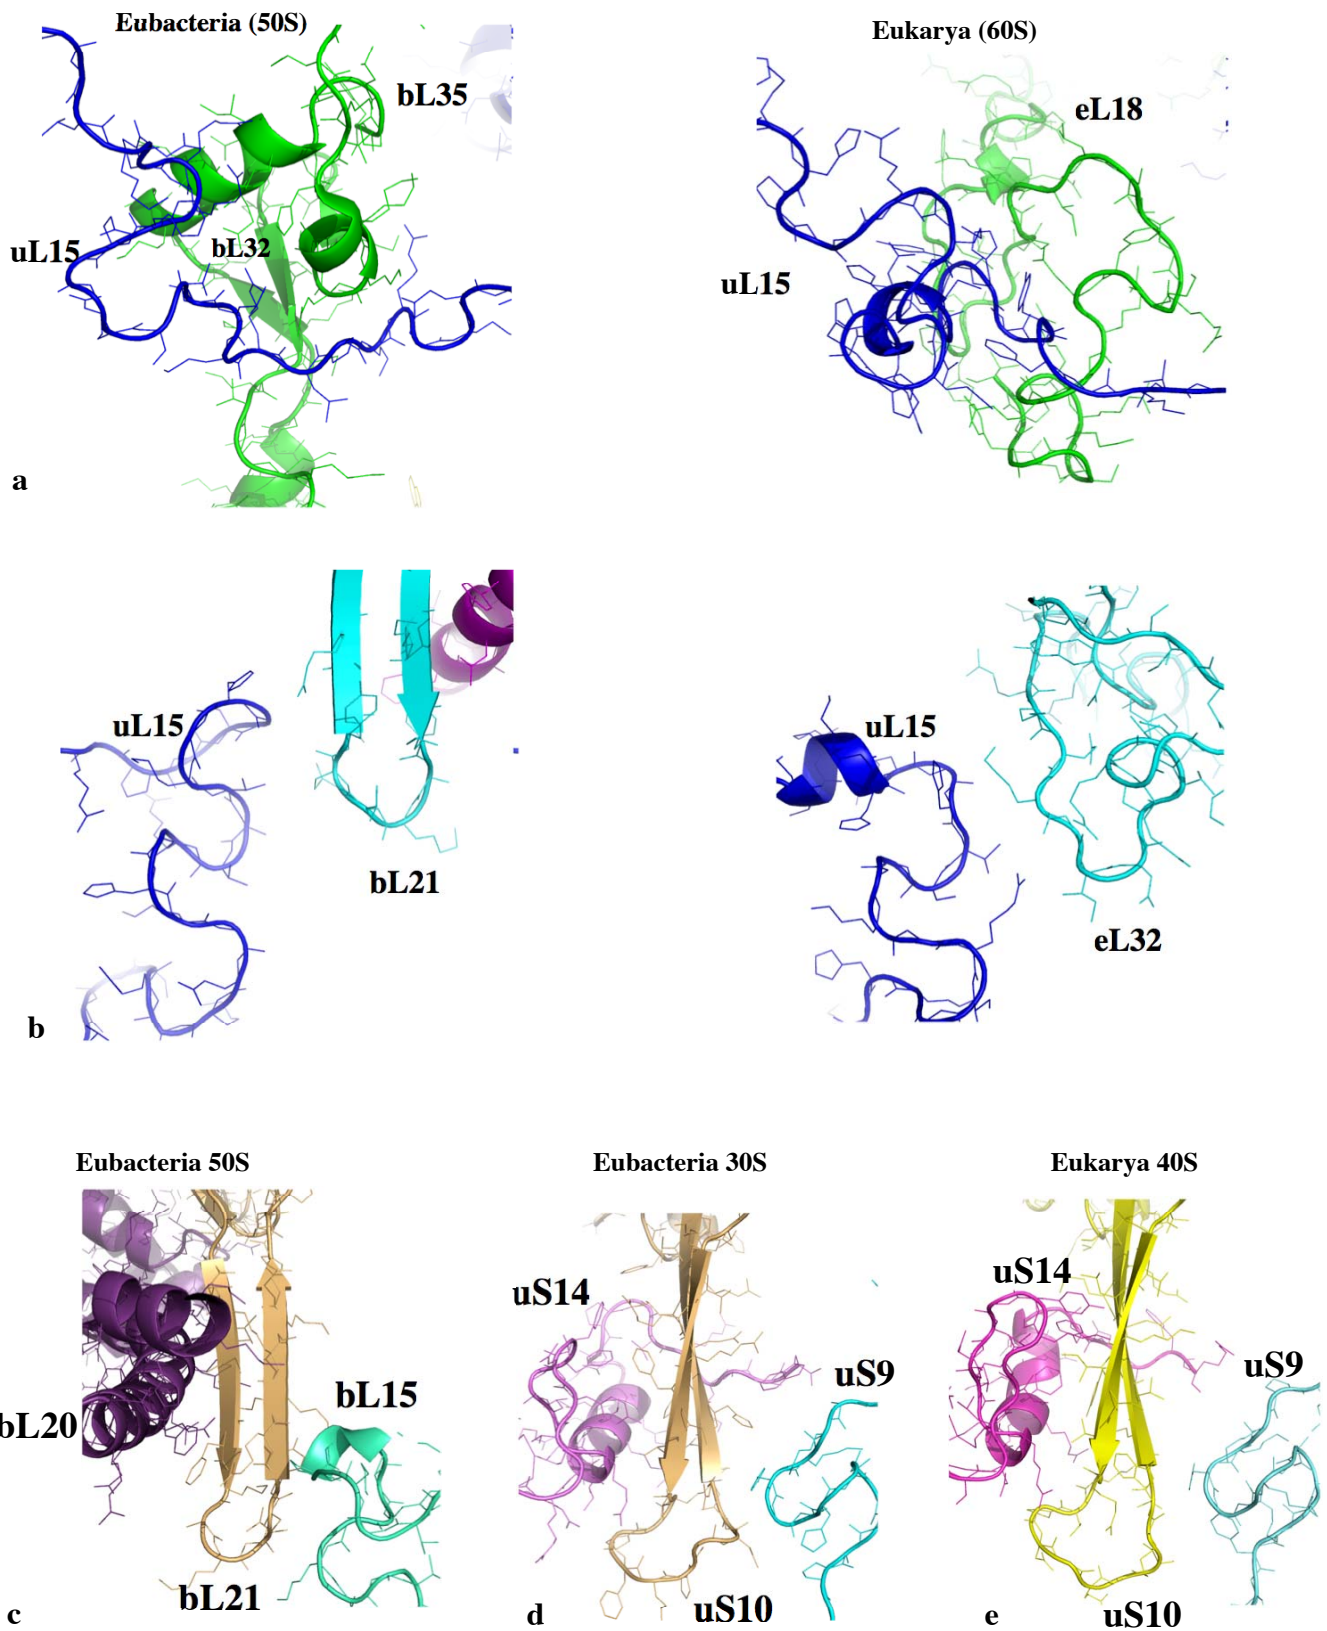

**Figure S9 :recurrent interacting motifs in ribosomal subunits across the evolution**

a: Comparison of uL15 - bL35 interaction in bacteria (pdb\_id: 4v8i) and eukarya (pdb\_id: 4v88).

b: Comparison of uL15 - bL21 interaction in bacteria (pdb\_id: 4v8i) and eukarya (pdb\_id: 4v88).

**Recurrent triplet motif formed by a  $\alpha$ -helix, a  $\beta$ -hairpin and a locally unstructured chain.**

c: bL20-bL21-uL15 in eubacterial 50S subunit (pdb\_id: 4v8i)

d: uS14-uS10-uS9 in eubacterial 30S subunit (pdb\_id: 4v8i)

e: uS14-uS10-uS9 in eukaryotic 40S subunit (pdb\_id: 4v88)

**Correct**

**Incorrect (x)**

**1. uL13 – uL3**

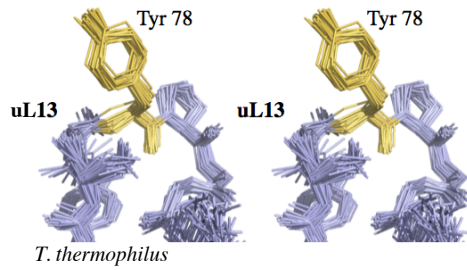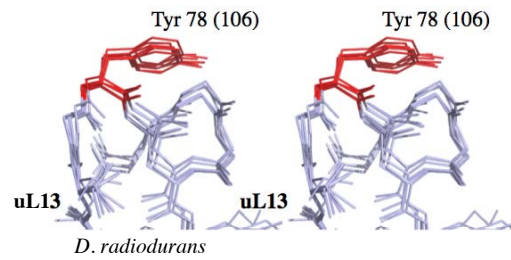

**2. uL13 – bL20**

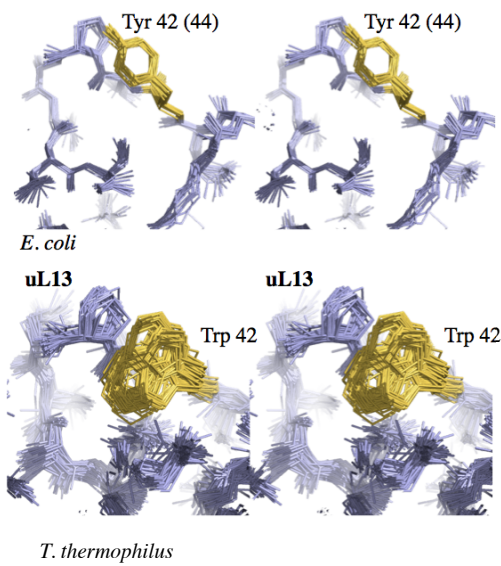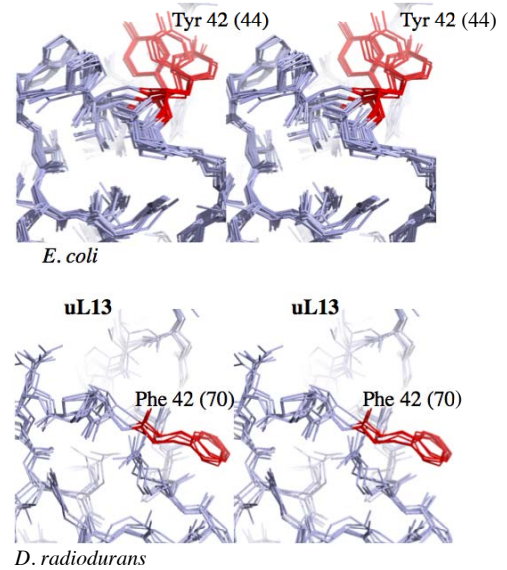

**3. uL13 – bL21**

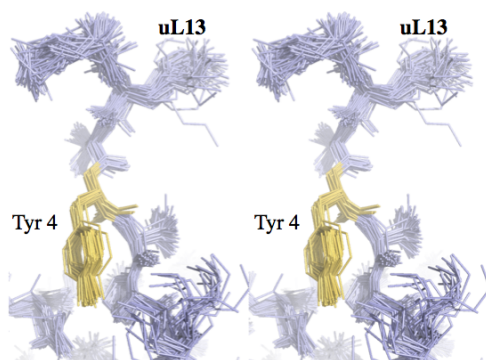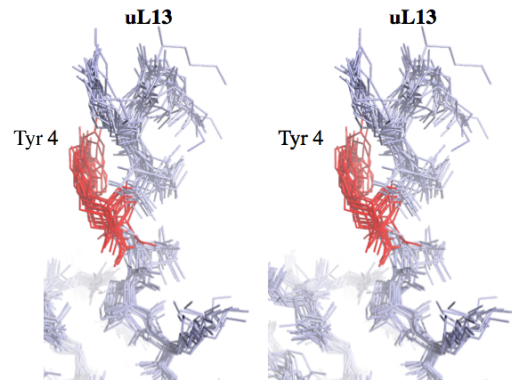

**4. bL15 – bL21**

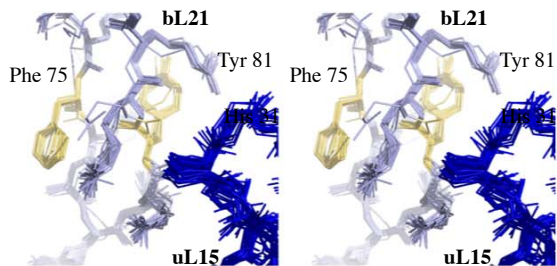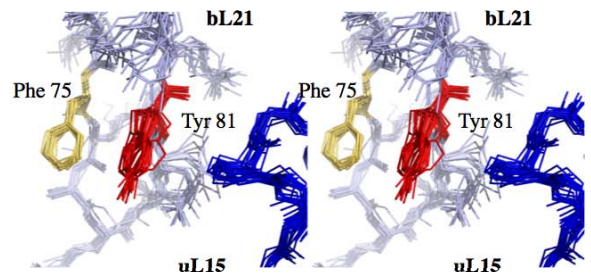

**Figure S10:** Correct and incorrect (x) models at the protein-protein interfaces of 50S and 70S pdb structures listed in table S15

Correct

Incorrect (x)

### 5. uL15-bL35

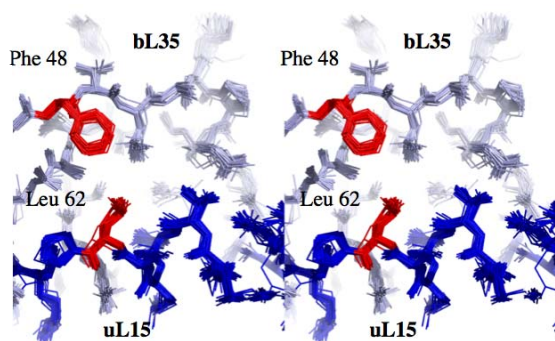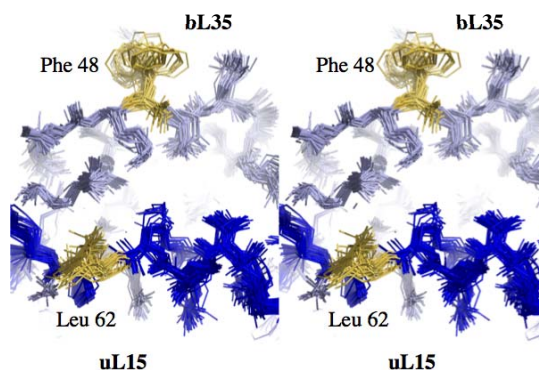

### 6. bL35 – bL33

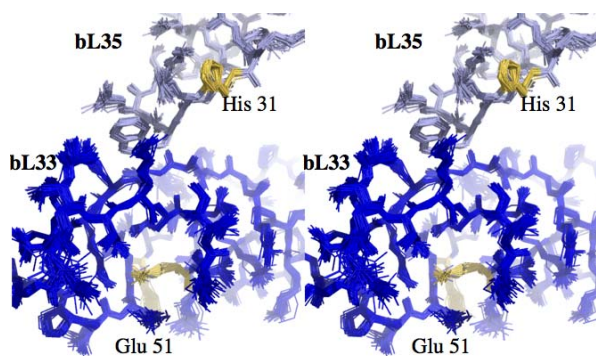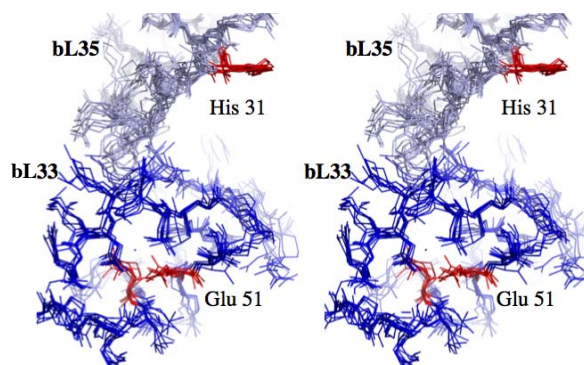

### 7. uL3 - bL17

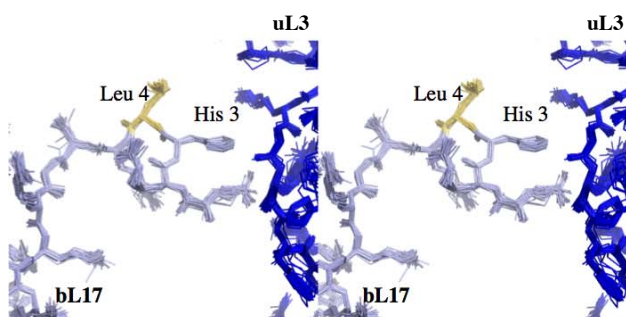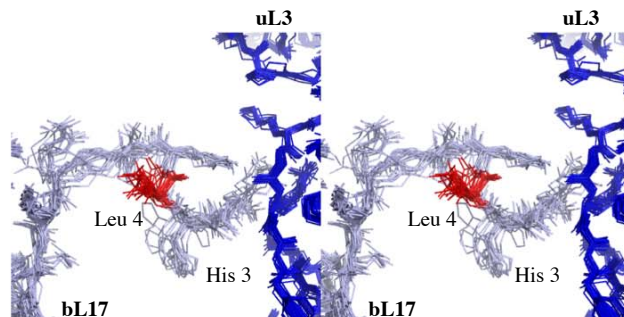

### 8. uL3-uL14

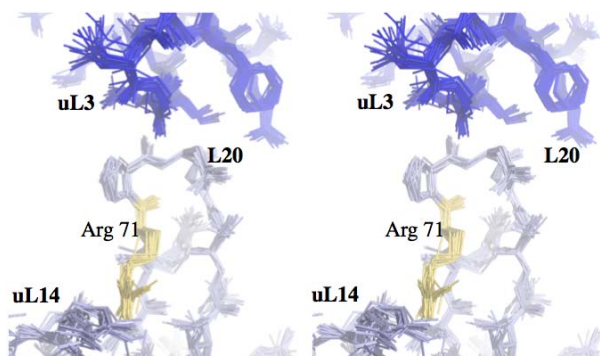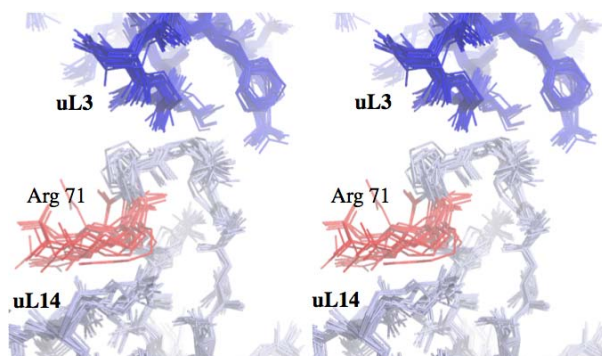

**Figure S10:** Correct and incorrect (x) models at the protein-protein interfaces of 50S and 70S pdb structures listed in table S15 (continued)

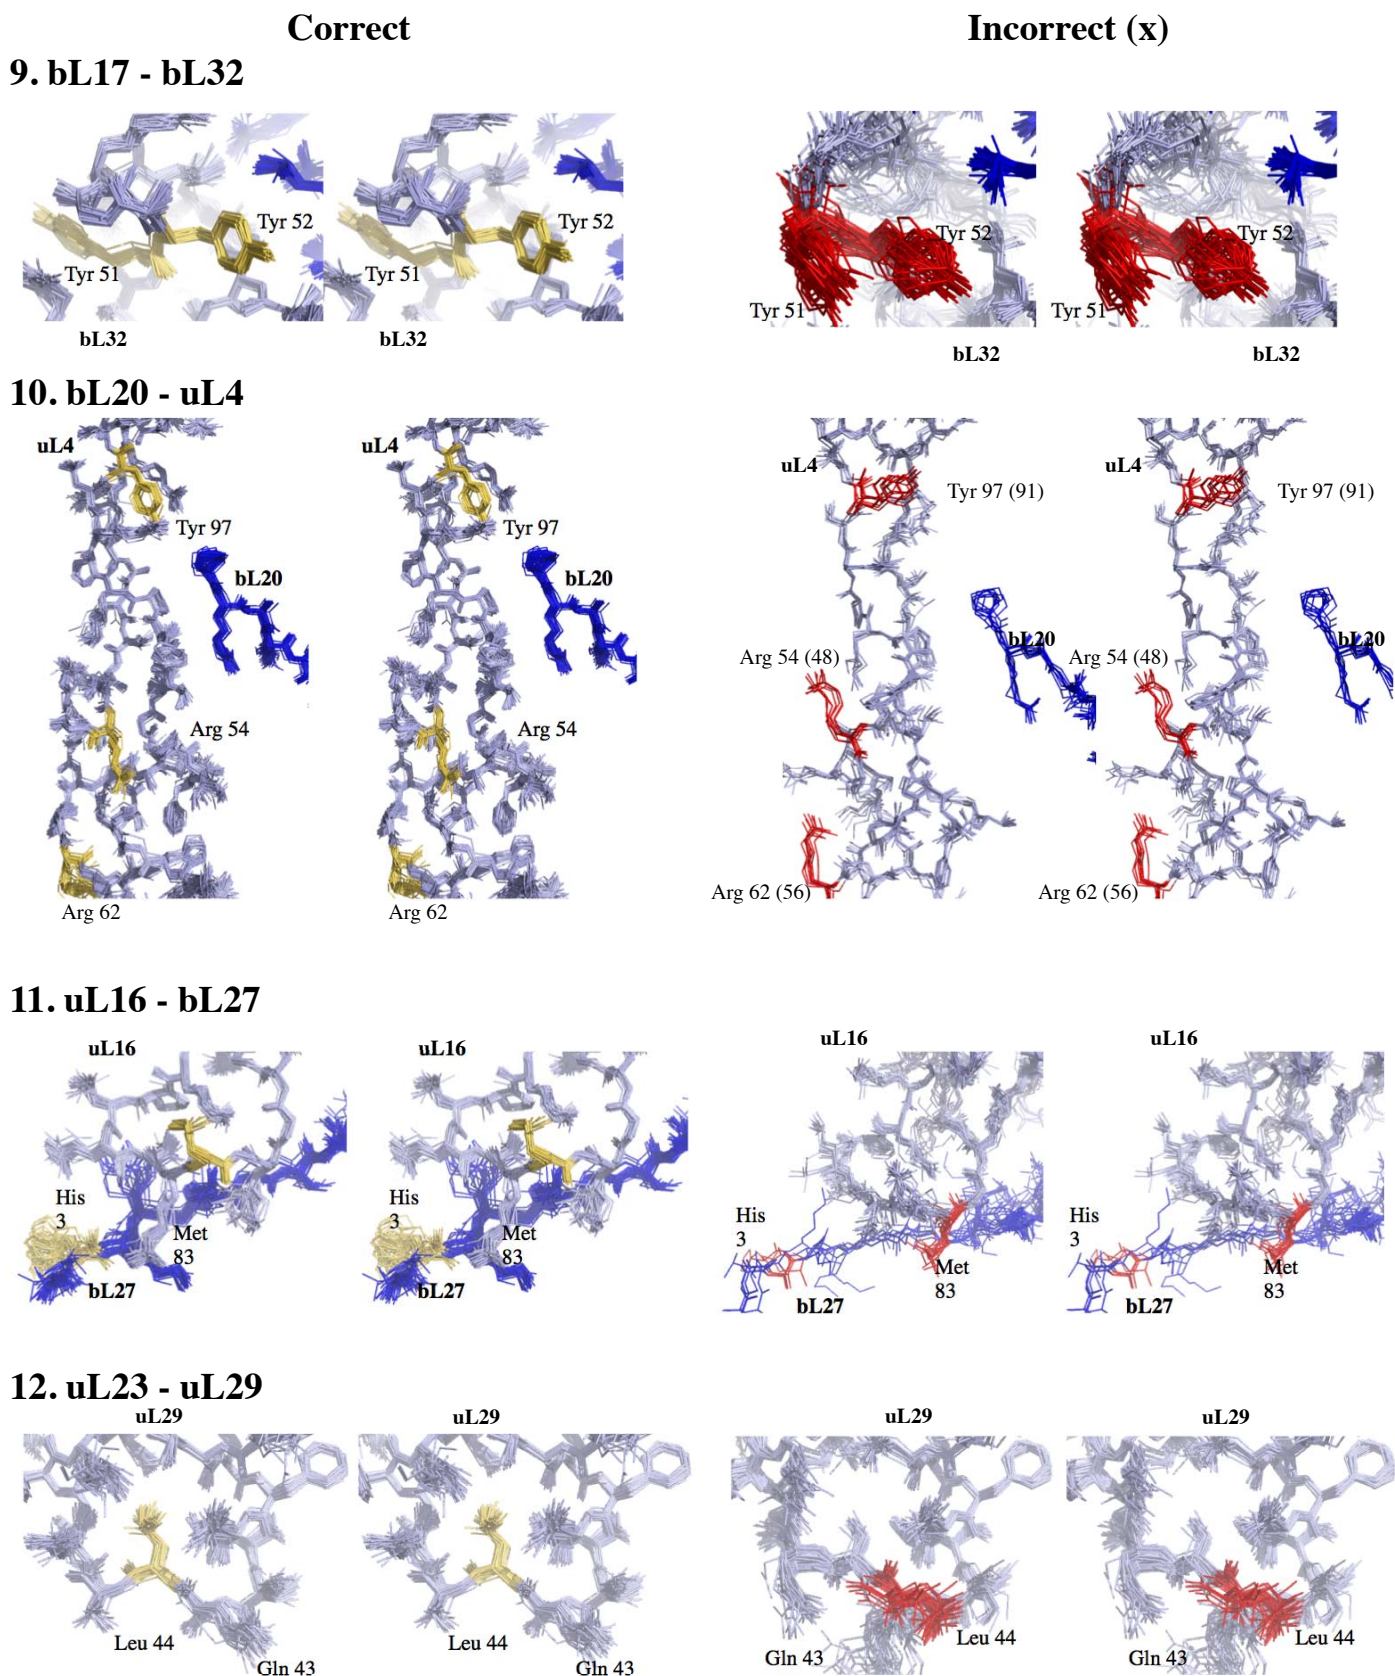

**Figure S10:** Correct and incorrect (x) models at the protein-protein interfaces of 50S and 70S pdb structures listed in table S15. Our careful inspection of electron density maps of each structure has revealed that except uL15-bL21 (that has been marked “?” in table S15), most of the models “x” are probably the results of a misinterpretation of a not well-resolved electron density map in the region.

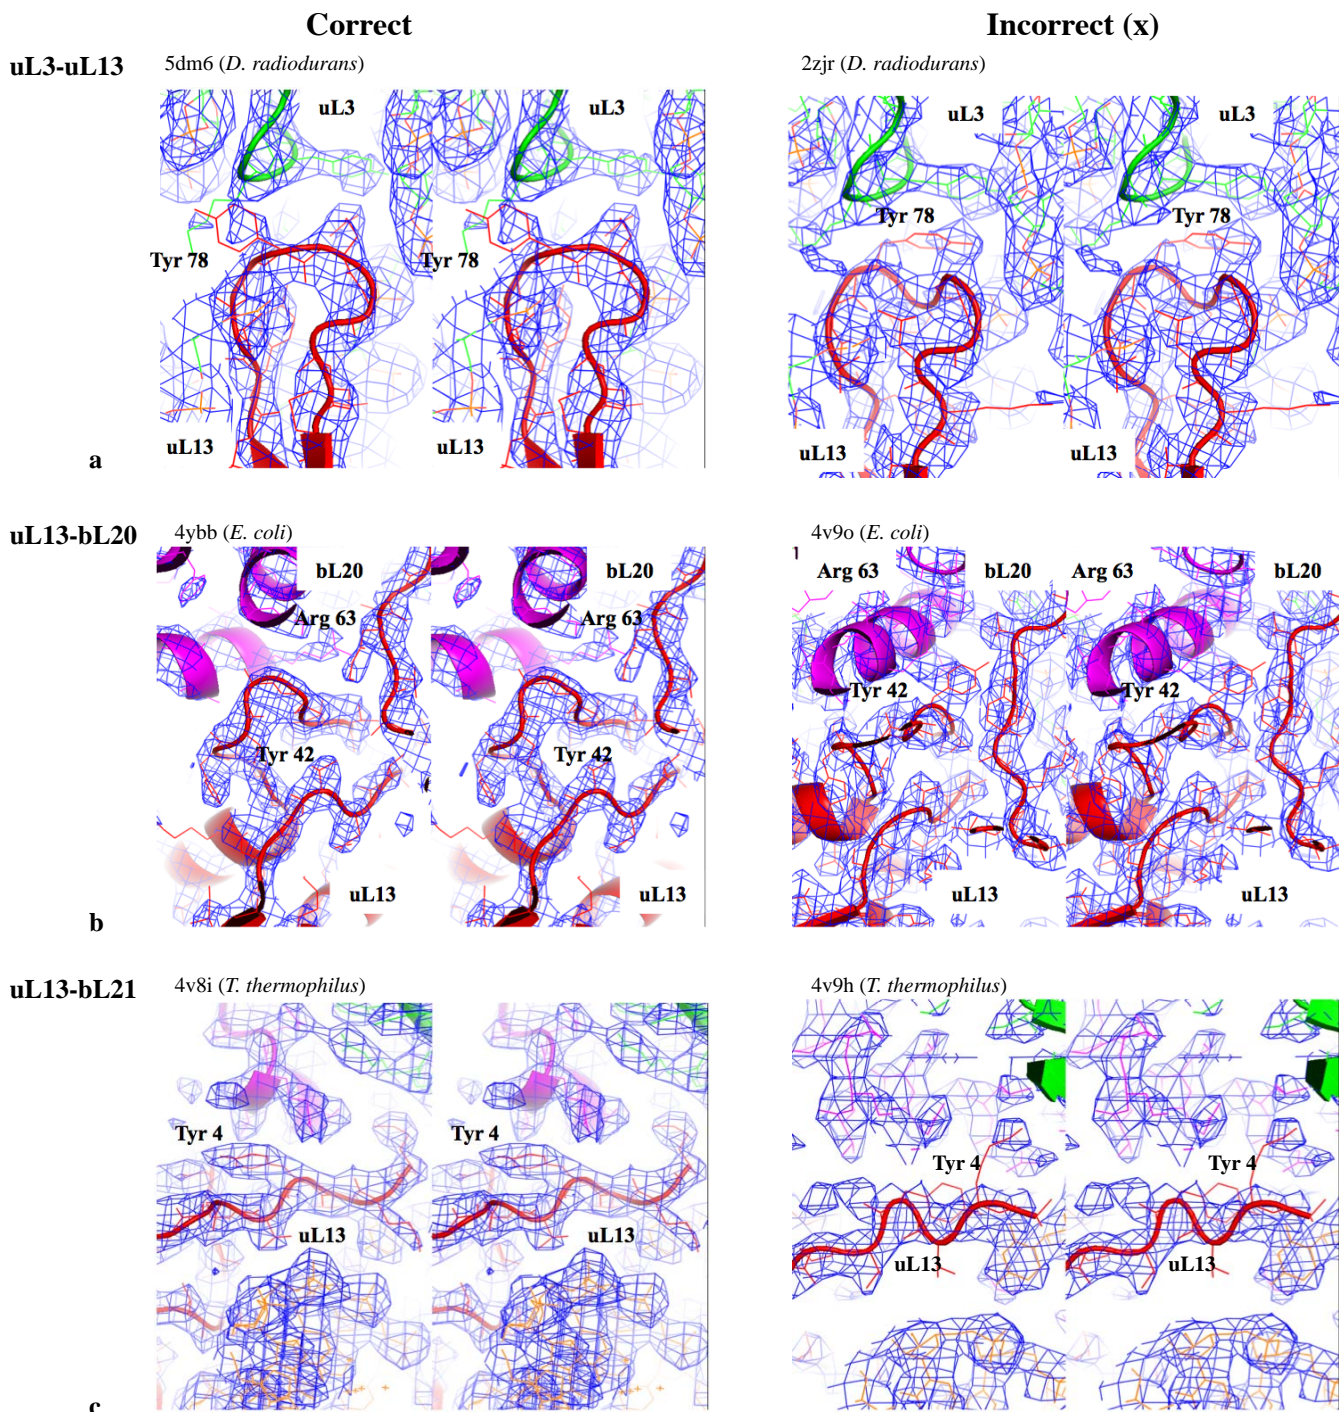

**Figure S11: Comparison of the electron density maps of the alternative models at the protein-protein interfaces reported in table S15. Left: correct models; right: incorrect (x) models.**

a: uL13-uL3 interface in the *D. radiodurans* 50S subunit

left: correct model (5dm6)

right: incorrect model (2zjr): tyr 106 (uL13) (78 in *T. thermophilus*) has been fitted into the density peak of gln 107 (uL13).

b: uL13-bL20 interface in the 70S *E. coli* 70S ribosome

left: correct model observed in the high resolution *E. coli* 70S ribosome 4ybb

right: incorrect model : in which tyr 42 (uL13) has been fitted into the density peak of arg 63 (bL20).

c: uL13-bL21 interface in the *T. thermophilus* 70S ribosome

left: correct model (4v8i)

right: incorrect model "1" in which tyr 4 (uL13) has been erroneously fitted into the density of thr 3 (uL13).

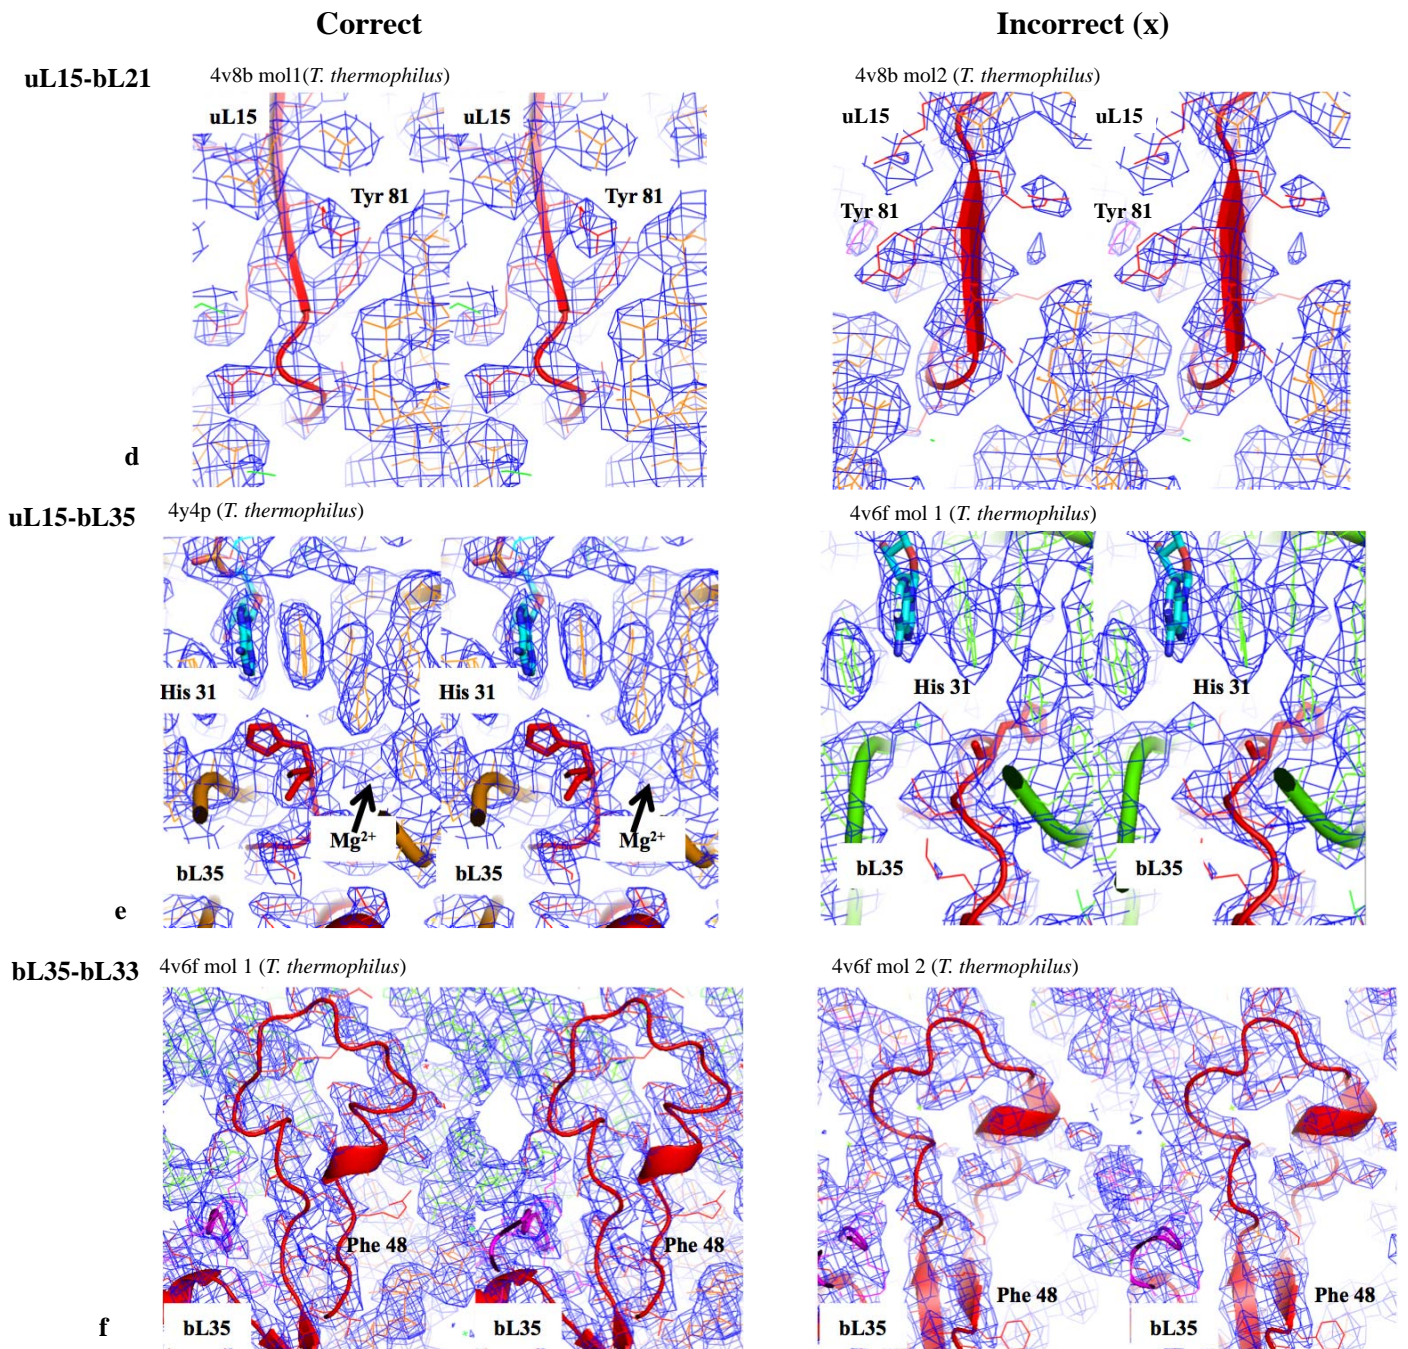

**Figure S11 (continued)**

d: uL15-bL21 interface in the *T. thermophilus* 70S ribosome

left: correct model observed in the first molecule of the asymmetric unit of 4v8b. The two aromatic residues of bL21 phe 75 and tyr 81 are on the opposite sides of the b-sheet.

right: alternative model "?" observed in the second molecule of the asymmetric unit of 4v8b. The two aromatic residues of bL21 phe 75 and tyr 81 are on the same side of the b-sheet. This alternative structure is compatible with the corresponding electron density map. However this structure only observed in a set of pdb entry marked "?" in table S15.

e: uL33-bL35 interface in the *T. thermophilus* 70S ribosome

left: correct model found in the 2.5 Å resolution 4y4p structure

right: incorrect model found in the molecule 2 of 4v6f structure. His 31 has been fitted into a peak that correspond to a Mg<sup>2+</sup> ion in the high resolution structure.

f: uL15-bL35 interface in the *T. thermophilus* 70S ribosome (continued)

left: correct model found in the molecule 1 of 4v6f and other high-resolution structures of the *T. thermophilus* 70S ribosome.

right: incorrect model found in the molecule 2 of the 4v6f structure. Lys 47 has been fitted into the density peak of phe 48 that becomes extruded out of density.

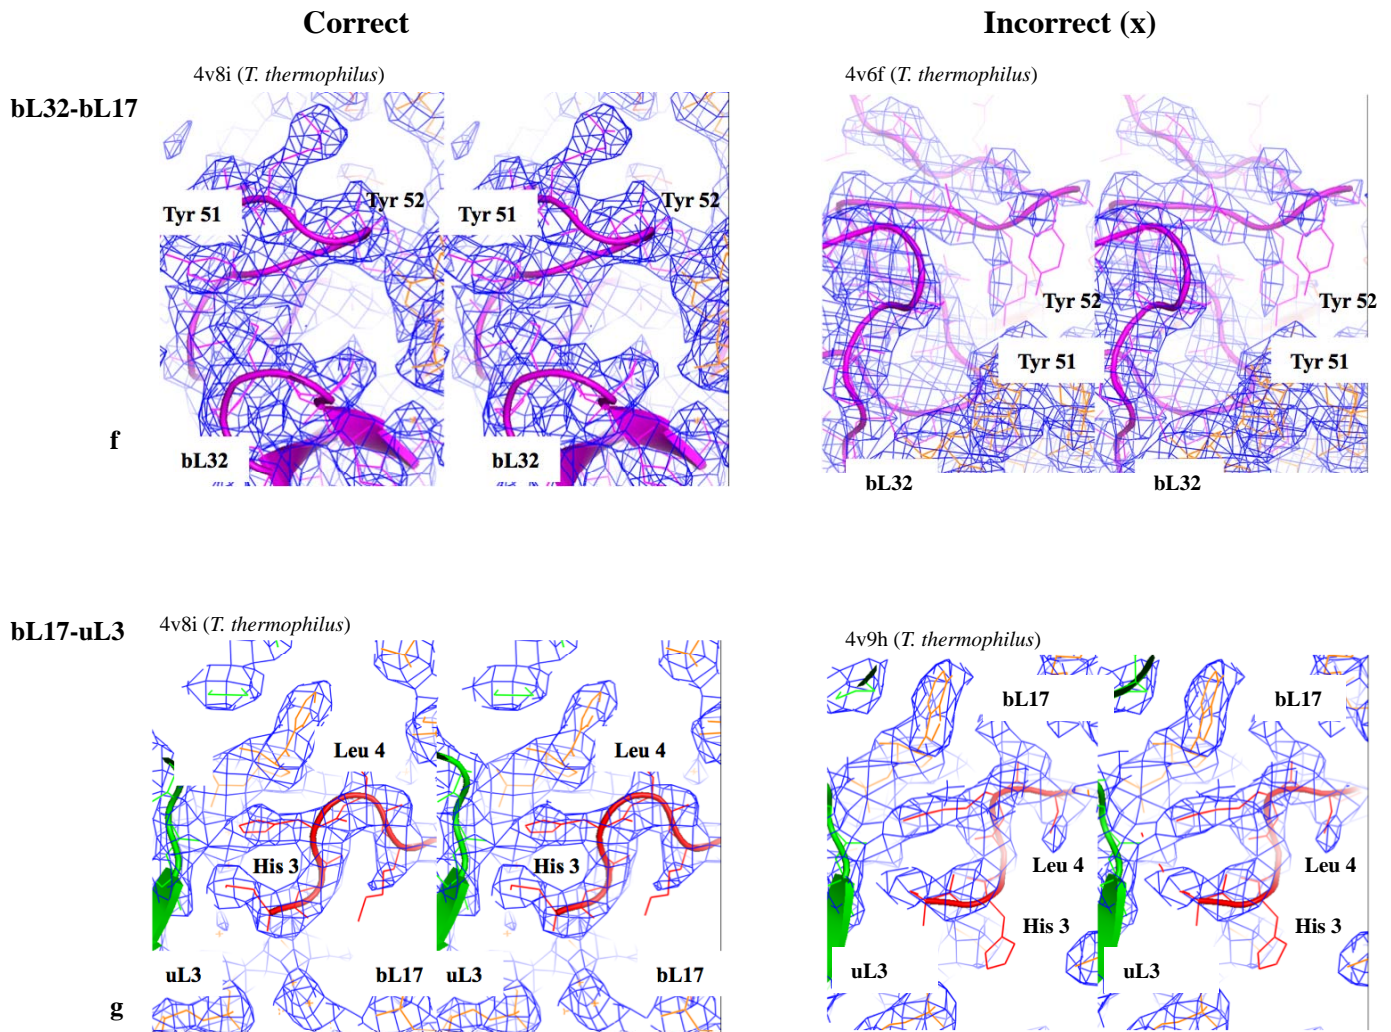

**Figure S11 (continued)**

g: bL17-bL32 interface in the *T. thermophilus* 70S ribosome

left: correct model found in 4v8i

right: incorrect model found in the structure of 4v6f. The tyrosines 51 and 52 of bL32 have been incorrectly fitted due to an interpretable map in this region.

h: bL17-uL3 interface in the *T. thermophilus* 70S ribosome

left: correct model found in 4v8i and other high-resolution structures of the *T. thermophilus* 70S ribosome.

right: incorrect model found in the structure of 4v9h. His 3 and leu 4 of bL17 have been incorrectly fitted due to an interpretable map in this region.
